# Supplementary material for: Tissue-specific shaping of the TCR repertoire and antigen specificity of iNKT cells
Source: eLife. 2019 Dec 16;8:e51663. doi: 10.7554/eLife.51663 (PMC6930077; doi:10.7554/eLife.51663)
Supplement: Figure 1—figure supplement 1—source data 1. [file elife-51663-fig1-figsupp1-data1.xlsx]

## Sheet: Sup1B
		Figure 1 -figure supplement 1B
		Frequency of Vb+ iNKT cells obtained from Flow-cytometry data
		Frequency of Vb7+ NKT cells					Frequency of Vb8+ NKT cells					Frequency of Vbother+ NKT cells
		Liver	Lung	SI-LP			Liver	Lung	SI-LP			Liver	Lung	SI-LP
		9.09	7.36	8.75			64.7	60.7	42.5			26.21	31.94	51
		7.65	8	6.34			63.1	53.7	35.6			29.25	38.3	37.4
		3.47	10.1	8.11			66.3	60.1	41.9			30.23	29.8	41.3
		6.73	10.1	13.1			72.6	61.6	46.6			20.67	28.3	28.8
		7.82	7.61	12.1			63.1	54.8	58.1			29.08	37.59	39.47
		8.05	8.95	9.13			65.5	59.4	51.4			24	26.9	44.9
		7.63	8	20.7			66.6	57.2	53.7			23.6	23.6	37.6

## Sheet: Sup1C
		Figure 1 -figure supplement 1C
		Frequency of Vb+ iNKT cells 12 days after adoptive transfer
		Frequency of Vb7+ NKT cells							Frequency of Vb8+ NKT cells
		Spleen		mLN		iLN			Spleen		mLN		iLN
		Recipient	Donor	Recipient	Donor	Recipient	Donor		Recipient	Donor	Recipient	Donor	Recipient	Donor
		4.3	7.8	11.4	9.1	9.7	0		65.2	66.2	56.9	54.5	60.5	45.5
		8.5	6.4	16.5	15.9	18.4	20		60	65.6	43.3	45.5	53.9	40
		11.2	10.7	15.5	14	17.3	11.1		59.4	60.7	45.3	42.1	48.9	44.1
		12.4	6	13.9	21.9	17.6	8.3		55.5	59.5	51.3	37	47.6	50
		13.3	6.6	12.8	8	15.6	9.5		57.1	60.4	49.4	40	52.2	57.1
