# Supplementary material for: Tissue-specific shaping of the TCR repertoire and antigen specificity of iNKT cells
Source: eLife. 2019 Dec 16;8:e51663. doi: 10.7554/eLife.51663 (PMC6930077; doi:10.7554/eLife.51663)
Supplement: Figure 1—figure supplement 2—source data 1. [file elife-51663-fig1-figsupp2-data1.xlsx]

## Sheet: Sheet1
		Figure 1- figure supplement 2
		Frequency of TRAV, TRAJ, TRBV and TRBJ sequences amongst total sequences (data obtained from RNAseq and pooled from 4 samples per tissue)
			thymus	spleen	mLN	iLN			thymus	spleen	mLN	iLN			thymus	spleen	mLN	iLN			thymus	spleen	mLN	iLN
		TRAV1	0.01	0.01	0.71	0		TRAJ11	0	0.04	0.18	0.06		TRBV1	13.8	16.03	13.97	17.84		TRBJ1-1	8.25	11.66	11.08	11.26
		TRAV10	0	0.05	0.07	0.03		TRAJ12	0.05	0.04	0.03	0.09		TRBV12-1	0.06	0.35	0	0		TRBJ1-2	6.89	6.24	6.16	12.08
		TRAV11	98.51	97.56	96.7	96.2		TRAJ13	0.03	0.03	0.01	0.17		TRBV12-2	0	0.06	0	0.07		TRBJ1-3	4.66	3.93	4.97	4.95
		TRAV12	0.17	0.09	0.09	0.07		TRAJ15	0.02	0.08	0.02	0		TRBV13-1	9.24	11.27	14.01	14.09		TRBJ1-4	4.48	3.64	4.62	6.92
		TRAV13	0.38	0.58	0.47	2.07		TRAJ16	0.08	0.09	0.09	0.09		TRBV13-2	36.08	37.98	29.18	30.57		TRBJ1-5	3.95	6.12	3.97	2.71
		TRAV14	0.04	0.11	0.08	0.25		TRAJ17	0.04	0.06	0.31	0.17		TRBV13-3	11.49	7.38	12.57	12.59		TRBJ1-6	1.3	2.48	2.09	2.31
		TRAV15	0.36	0.37	0.12	0.25		TRAJ18	98.35	96.3	96.69	95.91		TRBV14	0.12	0.17	0	0.07		TRBJ2-1	10.9	13.05	12.42	14.31
		TRAV16	0.01	0.09	0.09	0.07		TRAJ2	0.02	0.05	0.01	1.55		TRBV15	0.89	0.75	0.65	0.54		TRBJ2-2	3.3	2.89	3.18	0.75
		TRAV19	0	0	0.03	0		TRAJ21	0.07	0.31	0.03	0.19		TRBV16	0.18	0.75	0.35	1.09		TRBJ2-3	8.6	8.37	7.65	7.67
		TRAV20	0	0	0.08	0		TRAJ22	0.05	0.11	0.11	0.04		TRBV17	1.54	2.03	1.8	1.02		TRBJ2-4	13.61	12.07	9.84	6.17
		TRAV21	0	0.1	0.01	0		TRAJ23	0.01	0.04	0.21	0.06		TRBV19	0.77	0.64	1.2	0.07		TRBJ2-5	10.43	11.37	11.08	8.89
		TRAV3	0	0.03	0	0.03		TRAJ24	0.03	0.03	0.03	0.04		TRBV2	0.36	0.35	0	0		TRBJ2-7	23.63	18.19	22.95	21.98
		TRAV4	0.03	0.06	0.66	0.03		TRAJ26	0.09	0.13	0	0.04		TRBV20	0.12	0.12	0.55	1.36
		TRAV5	0.01	0.06	0.02	0.04		TRAJ27	0.11	1.15	0.85	0.07		TRBV21	0.06	0.06	0.3	0
		TRAV6	0.15	0.31	0.47	0.23		TRAJ28	0.22	0.11	0.17	0.27		TRBV22	0	0	0	0
		TRAV7	0.18	0.42	0.23	0.56		TRAJ30	0	0.14	0.08	0.04		TRBV23	0	0.06	0	0
		TRAV8	0.01	0.02	0	0.02		TRAJ31	0.03	0.16	0.12	0.22		TRBV24	0.18	0	0	0
		TRAV9	0.13	0.14	0.17	0.15		TRAJ32	0.09	0.5	0.22	0.01		TRBV26	0.06	0.06	0.2	0
								TRAJ33	0.02	0.01	0.02	0.24		TRBV29	22.27	18.76	20.5	17.02
								TRAJ34	0.13	0.08	0.29	0		TRBV3	0.53	0.52	0.15	0.2
								TRAJ35	0.09	0.03	0.02	0.06		TRBV30	0.06	0	0	0
								TRAJ37	0.01	0.01	0.02	0.01		TRBV31	0.18	0.7	1.5	0.61
								TRAJ38	0.02	0.02	0.09	0		TRBV4	0.65	0.93	0.5	0.82
								TRAJ39	0.01	0.14	0	0		TRBV5	1.36	1.05	2.59	2.04
								TRAJ4	0.16	0.05	0.08	0.12		TRBV8	0	0	0	0
								TRAJ40	0	0.01	0.03	0.07
								TRAJ42	0.03	0	0.09	0.01
								TRAJ43	0	0.01	0	0
								TRAJ44	0	0	0	0.02
								TRAJ45	0	0	0	0
								TRAJ47	0	0	0	0
								TRAJ48	0	0.01	0.03	0
								TRAJ49	0	0.01	0.06	0
								TRAJ5	0.01	0	0	0.14
								TRAJ50	0	0	0.01	0
								TRAJ52	0.03	0	0	0
								TRAJ53	0	0	0	0
								TRAJ56	0	0.01	0	0
								TRAJ57	0	0.1	0	0
								TRAJ58	0	0	0.01	0.03
								TRAJ6	0.06	0.01	0.01	0.15
								TRAJ7	0.03	0.04	0.01	0.03
								TRAJ8	0	0	0.02	0
								TRAJ9	0.11	0.08	0.07	0.09
