# Supplementary material for: Tissue-specific shaping of the TCR repertoire and antigen specificity of iNKT cells
Source: eLife. 2019 Dec 16;8:e51663. doi: 10.7554/eLife.51663 (PMC6930077; doi:10.7554/eLife.51663)
Supplement: Figure 1—figure supplement 3—source data 1. [file elife-51663-fig1-figsupp3-data1.xlsx]

## Sheet: Fig1-Sup3
	Figure 1- figure supplement 3
	Properties (as indicated) for each unique CDR3b sequence obtainted by RNAseq (sequences pooled from 4 samples per tissue)
	aa Length					Hydrophobicity					pI					Polar aa frequency					Aromatic aa frequency					Aliphatic aa frequency
	thymus	spleen	mLN	iLN		thymus	spleen	mLN	iLN		thymus	spleen	mLN	iLN		thymus	spleen	mLN	iLN		thymus	spleen	mLN	iLN		thymus	spleen	mLN	iLN
	18	16	16	15		-0.1611	-0.525	-0.475	-0.0933		4.10653	3.74997	3.55005	3.55005		0.6429	0.4706	0.4615	0.3571		0.2143	0.1176	0.2308	0.2857		0.0714	0.2353	0.1538	0.0714
	16	16	15	14		0.2937	0.2812	-0.1067	-0.3786		3.42471	3.55005	3.84995	3.55005		0.4	0.5333	0.3846	0.4615		0.1333	0.1333	0.1538	0.1538		0.2	0.2	0.1538	0.2308
	16	15	15	12		0.1187	-0.0333	-0.3067	0.325		3.49189	6.06264	6.22134	3.42471		0.4444	0.4375	0.5333	0.5		0.1667	0.125	0.1333	0.1429		0.1667	0.25	0.1333	0.1429
	15	14	15	17		-0.3667	0.2286	-0.6933	-0.4765		6.13573	4.18436	3.61368	3.29496		0.4667	0.5333	0.3571	0.5333		0.1333	0.1333	0.2143	0.2		0.1333	0.1333	0.1429	0.1333
	14	14	14	15		0.45	0.15	0.0286	0.72		3.84995	3.49189	3.49189	4.18435		0.2857	0.5	0.6	0.5714		0.2143	0.1429	0.1333	0.1429		0.0714	0.0714	0.1333	0.0714
	14	14	13	14		-0.1714	0.1286	0.0846	0.5571		5.28746	3.74997	4.10918	6.22134		0.5625	0.5	0.5333	0.5333		0.1875	0.125	0.1333	0.1333		0.125	0.125		0.2
	14	14	16	12		-0.2929	-0.4929	-0.2563	0.5667		3.29496	3.74997	3.84994	4.18434		0.5	0.4	0.4667	0.3571		0.1875	0.2	0.1333	0.2857		0.125	0.2	0.1333	0.0714
	14	12	15	16		0.2214	-0.375	-0.1867	0.1812		3.38003	4.18436	3.55005	3.55005		0.5625	0.5	0.3846	0.5		0.125	0.1429	0.2308	0.1667		0.0625	0.2143		0.1667
	14	16	15	15		-1.1357	-0.4938	0.8533	-0.2467		3.84994	3.84995	4.18434	3.84994		0.3333	0.3571	0.5625	0.2857		0.2	0.1429	0.1875	0.1429		0.3333	0.2143	0.125	0.2857
	13	15	15	15		-0.0769	0.8067	-0.2133	-0.48		3.55005	3.84995	3.55005	3.74997		0.5333	0.5385	0.4667	0.4615		0.2	0.1538	0.1333	0.1538		0.0667	0.0769	0.1333	0.1538
	16	15	15	15		-0.4062	-0.2133	-0.8467	-0.0067		3.55005	7.25228	5.44937	3.55005		0.4286	0.625	0.5333	0.5		0.2143	0.1875	0.2	0.1667		0.1429	0.125	0.1333	0.0833
	16	14	14	14		-0.2563	-0.3	0.2214	0.05		3.55005	6.1334	3.55005	3.84995		0.4615	0.375	0.6	0.4667		0.1538	0.125	0.1333	0.1333		0.0769	0.1875	0.1333	0.2
	15	13	14	14		0.0933	-0.3	0.1929	0.25		3.55005	3.55005	8.22118	6.06456		0.3846	0.4	0.4286	0.4615		0.2308	0.2	0.1429	0.0769		0.0769	0.2	0.2143	0.2308
	15	13	18	14		0	0.7231	-0.05	-0.6429		3.49189	3.92752	3.55005	7.25273		0.4444	0.6	0.3846	0.5		0.1667	0.1333	0.2308	0.25		0.1667	0.1333	0.1538	0.125
	15	12	17	14		0.06	0.4083	-0.7824	-0.4071		5.82405	3.74997	3.49189	3.49189		0.4375	0.4286	0.5333	0.4667		0.125	0.1429	0.2	0.1333		0.1875	0.2143	0.0667	0.1333
	15	12	16	13		-0.2933	-0.625	-0.1813	-0.3538		3.55005	3.55005	3.87598	6.13377		0.3125	0.4615	0.5385	0.3846		0.125	0.1538	0.2308	0.1538		0.1875	0.0769	0.0769	0.1538
	14	17	15	13		-0.6	-0.4235	-0.54	-0.1615		5.82405	3.42471	6.06264	3.55005		0.4667	0.375	0.6	0.4706		0.1333	0.25	0.1333	0.1176		0.0667	0.125	0.0667	0.1176
	13	16	15	13		0.5923	0.2312	-0.18	0.1615		5.82405	3.84994	3.74997	3.84994		0.3571	0.4375	0.4	0.3333		0.1429	0.125	0.1333	0.1333		0.2143	0.25	0.1333	0.2667
	13	16	15	12		-0.6538	0.0187	-0.76	-0.4583		8.22281	6.13377	4.10653	3.84998		0.4286	0.3333	0.5333	0.2857		0.1429	0.2	0.2	0.2143		0.1429	0.1333	0.0667	0.2857
	13	16	15	12		-0.4462	0.2375	0.3467	-0.0833		3.49189	3.74997	3.49189	3.84995		0.5	0.4286	0.5833	0.4167		0.1429	0.1429	0.1667	0.1667		0.1429	0.2143	0.0833	0.1667
	13	16	15	12		-0.0538	-0.2188	-0.1667	-0.4667		3.55005	4.18435	4.18435	3.74997		0.4286	0.4286	0.4286	0.4		0.1429	0.1429	0.1429	0.0667		0.1429	0.1429	0.1429	0.2667
	13	16	15	13		0.1308	-0.0063	0.2067	0.5154		4.10918	3.84994	3.74997	3.84994		0.6429	0.3571	0.4615	0.5		0.1429	0.1429	0.1538	0.1429		0.0714	0.2143	0.1538	0.1429
	13	16	15	12		-0.5538	0.2812	0.02	0.325		4.18435	6.06224	6.13573	3.49189		0.5385	0.5	0.3333	0.4286		0.1538	0.1429	0.1667	0.1429		0.1538	0.1429	0.1667	0.1429
	12	16	15	14		0.2667	0.2875	-0.14	0.2286		5.28746	3.61368	3.74997	6.22134		0.4118	0.4167	0.3333	0.5		0.2353	0.1667	0.1667	0.1429		0.1765	0.0833	0.1667	0.1429
	5	16	15	12		0.56	-0.0563	-0.1867	-1.2667		3.55005	3.55005	6.13573	3.55005		0.4667	0.3571	0.4	0.4667		0.2667	0.1429	0.1333	0.2		0.0667	0.2143	0.2	0.0667
	18	16	14	15		-0.1278	-0.2812	1.0429	0.0333		3.38003	3.84995	3.55005	3.84995		0.6	0.3333	0.6	0.4167		0.1333	0.1667	0.1333	0.1667		0.1333	0.1667	0.1333	0.1667
	17	16	14	15		-0.4118	0.0125	-0.2429	-0.8867		3.61368	3.84995	3.74997	3.49189		0.4375	0.3636	0.5	0.5		0.1875	0.2727	0.125	0.1429		0.125	0.1818	0.125	0.1429
	16	15	14	14		-0.0938	-0.28	0.1286	0.8857		6.22134	6.13573	8.23143	4.18436		0.4667	0.4375	0.5333	0.4286		0.1333	0.0625	0.2	0.1429		0.0667	0.1875	0.1333	0.1429
	16	15	14	14		-0.6125	0.5533	-0.1	-0.1929		3.61368	8.22281	5.82405	3.42471		0.3846	0.4286	0.3333	0.5		0.3077	0.1429	0.1333	0.2143		0.1538	0.1429	0.2667	0.0714
	16	15	13	13		0.1312	0.0533	0.4308	-0.9231		6.06264	3.84995	6.06264	3.55005		0.4118	0.3077	0.4667	0.4167		0.1765	0.1538	0.1333	0.3333		0.1765	0.0769	0.1333	0.0833
	16	15	13	12		-0.0438	-0.3467	0.1385	-0.2		3.74997	3.84995	3.49189	3.55005		0.3571	0.4667	0.5333	0.4		0.1429	0.2	0.2	0.1333		0.2143	0.1333	0.0667	0.2
	15	15	13	16		-0.9467	-0.1067	-0.2846	-0.5875		5.35866	3.74997	3.55005	4.18436		0.4615	0.5	0.5	0.4667		0.2308	0.1429	0.1429	0.1333		0.2308	0.1429	0.2143	0.2667
	15	15	12	15		-0.0933	-0.0533	-0.1333	-0.5067		3.84994	3.61368	8.22281	3.55005		0.3846	0.5	0.3571	0.4286		0.1538	0.25	0.1429	0.2857		0.1538		0.1429	0.0714
	14	15	12	14		0.4429	-0.4133	-0.4833	0.05		3.49189	3.74996	3.42471	3.55005		0.4667	0.4375	0.4286	0.4286		0.1333	0.25	0.1429	0.1429		0.1333	0.0625	0.2143	0.2143
	14	15	12	14		-0.0143	-0.2867	-0.0333	-0.2		3.61368	3.84994	6.13573	5.82405		0.5	0.3333	0.4545	0.3571		0.2143	0.1333	0.1818	0.1429		0.0714	0.2667	0.1818	0.2143
	14	15	18	14		-0.0429	-0.5133	-0.5222	-0.05		8.22118	6.06264	5.40326	4.18436		0.4286	0.4667	0.5556	0.4286		0.1429	0.1333	0.1667	0.1429		0.2143	0.1333	0.0556	0.2143
	14	15	17	13		-0.1286	-0.2267	0.5412	-0.4615		3.55005	6.22134	4.25807	5.82405		0.3846	0.5	0.4375	0.4375		0.2308	0.1429	0.125	0.125		0.1538	0.0714	0.25	0.125
	14	15	16	15		-0.1286	-0.2133	0.3812	-0.5333		3.61368	3.61368	5.82405	6.22134		0.5	0.4615	0.4375	0.5333		0.25	0.2308	0.125	0.1333		0.0833	0.1538	0.1875	0.2
	14	15	16	14		-0.3071	0.6333	-0.3062	0.0929		3.84994	3.84995	3.84994	3.49189		0.3846	0.3846	0.4	0.5333		0.1538	0.1538	0.1333	0.1333		0.1538	0.1538	0.1333	0.1333
	14	14	16	13		-0.2286	-0.5	-0.775	-0.1385		3.55005	5.826	3.55005	3.98003		0.3846	0.3333	0.4286	0.5333		0.3077	0.1667	0.2143	0.1333			0.1667	0.2143	0.2
	13	14	15	13		0.2846	-1.05	0.7467	-1.4		3.61368	6.1334	4.10918	3.74997		0.5	0.5	0.5714	0.5714		0.1667	0.25	0.1429	0.1429		0.0833	0.0833	0.0714	0.1429
	13	14	15	12		0.1769	-0.1857	-0.02	0.1917		3.55005	4.18436	4.10918	5.82405		0.4375	0.5	0.5625	0.4286		0.125	0.125	0.125	0.1429		0.125	0.125	0.1875	0.2143
	12	14	15	12		0.2417	-0.3714	-0.58	-0.9083		6.13377	4.10921	9.4987	3.55005		0.4375	0.4667	0.6923	0.5714		0.125	0.1333	0.1538	0.1429		0.1875	0.1333	0.0769	0.0714
	18	14	15	12		-0.0222	0.55	-0.9733	-0.2667		8.22971	3.61368	7.41966	4.25809		0.4667	0.3333	0.3889	0.4286		0.1333	0.2	0.2778	0.2143		0.2	0.1333	0.2222	0.1429
	17	14	15	10		-0.5882	-0.1786	0.1267	-0.04		3.49189	4.10918	3.55005	4.18436		0.4667	0.5294	0.5294	0.4615		0.1333	0.1176	0.1176	0.1538		0.2	0.1765	0.0588	0.2308
	16	14	14	15		-0.5	0.3357	-0.6143	-0.06		3.74997	6.13573	3.74997	3.55005		0.4	0.4	0.5	0.4615		0.1333	0.1333	0.125	0.2308		0.1333	0.3333	0.125	0.0769
	16	14	14	11		0.1562	-0.2071	0.1286	0.3273		3.55004	3.74997	6.22134	3.55005		0.4667	0.4	0.4667	0.3846		0.2	0.2	0.2	0.1538		0.0667	0.2	0.1333	0.1538
	16	14	14	14		0.05	-0.5143	0.6	0.0571		6.06264	3.84994	6.06264	3.55006		0.6429	0.3333	0.4667	0.5		0.1429	0.1333	0.2	0.3333		0.0714	0.2	0.1333	0.0833
	16	14	14	14		-0.3062	-0.1286	0.2286	-0.7214		3.61368	6.13573	4.10918	6.06224		0.4615	0.5	0.6	0.5		0.1538	0.1429	0.1333	0.1667		0.2308	0.1429	0.1333	0.1667
	16	14	13	12		-0.3375	-0.5357	-0.1077	-1.0083		3.55005	3.55005	4.18108	6.06224		0.4615	0.5714	0.4	0.5833		0.2308	0.1429	0.2	0.1667		0.0769		0.2	0.0833
	16	13	12	17		-0.1562	0.1462	0.325	-0.3118		3.55005	3.61368	3.74997	4.18435		0.3846	0.4615	0.5333	0.6		0.2308	0.1538	0.1333	0.1333		0.0769	0.0769	0.1333	0.1333
	16	13	12	16		-0.8688	0.3846	-0.7917	-0.625		3.92752	3.61368	3.55005	3.74997		0.4615	0.3846	0.4	0.4		0.1538	0.2308	0.1333	0.1333		0.1538	0.1538	0.2	0.2
	15	13	11	16		0.3867	-0.7154	-0.7909	-0.925		3.55005	3.84995	4.18435	4.18435		0.4615	0.5385	0.4667	0.5333		0.1538	0.2308	0.1333	0.1333		0.1538		0.2	0.1333
	15	13	16	15		0.84	0.0385	-0.5875	-0.7333		4.18435	3.61368	3.61368	6.22134		0.5385	0.4167	0.4667	0.5		0.1538	0.1667	0.1333	0.125		0.0769	0.1667	0.1333	0.25
	15	13	16	15		-0.6933	-1.0462	-0.6312	-0.0467		3.84994	4.10918	4.18436	5.82405		0.3333	0.4706	0.4	0.5333		0.1667	0.1176	0.1333	0.1333		0.1667	0.1765	0.1333	0.0667
	15	13	16	15		0.2067	-0.8615	-0.8562	-0.5067		5.826	3.84995	3.84995	3.55005		0.6	0.375	0.3571	0.375			0.1875	0.1429	0.1875			0.1875	0.2857	0.1875
	15	13	15	15		-0.36	-1.2615	-0.3333	0.1667		3.55005	3.84994	3.49189	8.77187		0.5385	0.3125	0.4286	0.4667		0.1538	0.1875	0.1429	0.2		0.1538	0.1875	0.1429	0.1333
	15	13	15	14		0.3067	-0.0846	-0.5867	-0.1571		3.49189	3.55005	6.06264	3.61368		0.5625	0.5	0.4286	0.4667		0.125	0.125	0.1429	0.1333		0.0625	0.1875	0.2143	0.2667
	15	12	15	14		-0.0267	0.15	-0.5533	0.2357		4.18436	3.74997	5.82405	6.22134		0.4286	0.5	0.2857	0.5		0.1429	0.125	0.1429	0.1429		0.2143	0.1875	0.0714	0.1429
	15	12	14	14		-0.02	0.4083	-0.6429	0		3.84994	4.18435	3.61368	3.84994		0.4444	0.4375	0.3846	0.5		0.1111	0.125	0.1538	0.1429		0.1667	0.1875	0.2308	0.1429
	15	12	13	14		-0.2467	0.325	-0.7	-0.6286		3.74997	4.18435	3.61368	3.84994		0.5294	0.5	0.4615	0.4615		0.1765	0.125	0.1538	0.1538		0.1176	0.25	0.1538	0.2308
	15	12	12	13		-0.3533	-0.4333	-0.1417	-0.2846		6.22134	3.55005	3.61368	3.55005		0.5	0.4375	0.4615	0.5		0.125	0.125	0.2308	0.1667		0.1875	0.25	0.0769	0.1667
	15	12	11	13		0.16	-0.675	0.0545	-0.6769		6.06264	3.55005	4.10918	7.35552		0.5625	0.375	0.5	0.3571		0.125	0.1875	0.1667	0.2143		0.125	0.1875	0.1667	0.2143
	15	11	14	12		-0.2533	0.3545	-0.6714	-0.3		3.55005	4.18436	3.61368	3.38003		0.5	0.5	0.5	0.5385		0.125	0.125	0.25	0.1538		0.1875	0.1875	0.0833	0.1538
	15	11	17	11		-0.2733	0.2909	-0.6235	-0.6727		3.74997	5.82405	5.82405	3.92755		0.5	0.4375	0.5833	0.5333		0.125	0.125	0.1667	0.1333		0.1875	0.125	0.0833	0.1333
	15	11	16	10		-0.1067	-0.7455	-1.15	-0.69		3.92752	3.55005	6.06456	3.92755		0.5333	0.3333	0.5714	0.5833		0.2	0.2667	0.0714	0.25		0.0667	0.0667	0.1429	0.0833
	15	11	16	17		-0.4933	-0.4364	-0.5	-0.0765		3.55005	5.82405	3.38003	3.87599		0.4667	0.3333	0.4375	0.5385		0.1333	0.1333	0.1875	0.1538		0.1333	0.2	0.125	0.2308
	14	18	15	15		0.8214	-0.3111	0.2733	-0.0067		5.82405	3.84994	5.82405	3.55006		0.4286	0.4	0.4	0.3529		0.1429	0.2	0.2	0.2353		0.2143	0.2	0.1333	0.2353
	14	17	15	15		-0.1429	0.1118	-0.16	-1.1533		3.55005	3.74997	3.42471	3.33853		0.4286	0.5333	0.4	0.4375		0.2143	0.1333	0.2667	0.125		0.1429	0.0667	0.1333	0.1875
	14	16	15	15		-0.0714	0.1062	-0.14	0.3133		4.18436	5.44939	5.82405	3.74999		0.5	0.4667	0.3333	0.4286		0.1429	0.2667	0.1333	0.1429		0.2143	0.2	0.1333	0.1429
	14	16	15	15		0.0643	-0.175	0.4733	-0.5133		6.06224	4.18435	3.84995	3.82608		0.4286	0.4667	0.3846	0.6923		0.1429	0.1333	0.2308	0.1538		0.1429	0.1333	0.1538	0.0769
	14	16	15	15		0.8357	0.4375	-0.2267	-0.56		3.84994	3.49189	4.10918	3.55006		0.5	0.5333	0.5625	0.4286		0.1429	0.0667	0.125	0.1429		0.1429	0.2	0.0625	0.1429
	14	16	15	14		-0.05	0.5688	-0.5133	-0.0143		6.22134	3.87598	4.18435	4.18438		0.4286	0.4667	0.4667	0.4667		0.1429	0.2667	0.1333	0.1333		0.0714	0.1333	0.2	0.2667
	14	16	15	14		0.55	-0.3688	0.1067	0.0429		4.18435	4.10921	4.18436	3.61369		0.5	0.5333	0.5333	0.4		0.1429	0.1333	0.1333	0.1333		0.0714	0.1333	0.0667	0.2
	13	16	15	14		0.0385	-0.45	-0.1733	0.15		3.84995	3.55005	6.22134	5.92254		0.5385	0.4	0.5625	0.4167		0.1538	0.2	0.125	0.0833		0.0769	0.1333	0.125	0.25
	13	16	15	14		-0.1231	-0.3562	-0.6333	-0.3357		3.61368	6.06264	4.18436	3.55006		0.4615	0.4667	0.5333	0.5		0.1538	0.1333	0.1333	0.1667		0.1538	0.1333	0.0667	0.1667
	13	16	14	14		0.3308	-0.3313	0.2643	0.0214		6.13573	3.61368	3.42471	3.84995		0.5	0.4	0.4	0.3333		0.1667	0.1333	0.2	0.1333		0.1667	0.2667	0.0667	0.2
	12	16	14	13		-0.2917	-0.2563	-0.9357	0.4		3.74997	6.13377	3.84995	4.18438		0.4375	0.5	0.2857	0.6		0.125	0.1429	0.2143	0.2		0.1875	0.0714	0.2143	0.1333
	12	16	14	13		-0.1083	0.2937	-0.2929	-0.4923		3.33852	7.25157	5.35863	3.84994		0.6	0.5714	0.4615	0.4286		0.1333	0.2143	0.2308	0.1429		0.0667		0.2308	0.2857
	12	15	14	13		-0.1917	-0.3133	-0.1857	0.0385		4.25421	5.826	3.74997	3.55006		0.5455	0.5	0.3529	0.4286		0.2727	0.0714	0.1176	0.2857		0.0909	0.2143	0.1765	0.2143
	12	15	14	11		-0.6333	0.8	-0.5643	-0.0091		3.49189	4.18436	6.22134	3.38003		0.5333	0.4286	0.5	0.6923		0.1333	0.1429	0.125	0.1538		0.2	0.1429	0.25	0.0769
	12	15	14	10		-0.325	0.3733	-0.4	0.41		3.55005	3.84995	8.23143	4.18436		0.4286	0.3571	0.5333	0.5		0.1429	0.1429	0.1333	0.1667		0.1429	0.1429	0.1333	0.25
	11	15	14	17		-0.2091	0.5933	-0.3714	-0.5294		3.74997	3.84995	4.10918	3.55006		0.5	0.3571	0.5333	0.3571		0.1429	0.2143	0.1333	0.2143		0.0714	0.1429	0.1333	0.2143
	11	15	14	15		0.2	-0.12	-0.4286	-1.0733		3.55005	6.13377	4.10653	3.84998		0.4615	0.4286	0.6667	0.3846		0.2308	0.1429	0.2	0.3077		0.0769	0.2857	0.0667	0.0769
	15	15	14	15		-0.08	-0.5733	-0.3571	-0.1733		3.55005	3.49189	3.60603	3.55006		0.4615	0.4286	0.6	0.4		0.1538	0.1429	0.1333	0.2		0.1538	0.0714	0.0667	0.1333
	16	15	14	14		-0.5188	0.0533	-0.4	-0.5929		3.84994	4.18436	8.22281	3.84994		0.4167	0.4286	0.4667	0.3846		0.1667	0.1429	0.1333	0.1538		0.1667	0.1429	0.1333	0.2308
	15	15	13	14		-1.0067	-0.3133	0.4231	-0.5		3.55005	3.74997	3.74997	3.84998		0.3333	0.5	0.5333	0.4444		0.1667	0.1429	0.1333	0.3333		0.1667	0.1429	0.0667	0.1111
	14	14	13	14		-0.8429	0.4714	-0.2154	-0.35		4.18436	4.18434	5.35863	4.18436		0.4118	0.5	0.5714	0.4		0.1765	0.2857	0.2143	0.2		0.1176	0.0714	0.0714	0.2
	14	14	13	14		-0.75	0.25	-0.5231	-0.2143		3.74997	3.74997	4.18435	3.49189		0.5	0.3077	0.5	0.5		0.1875	0.0769	0.1667	0.1429		0.0625	0.2308	0.1667	0.2143
	11	14	13	14		-0.4455	0.4357	-0.3077	0.0786		3.74997	4.18435	4.25807	3.74999		0.4375	0.3846	0.4545	0.5		0.125	0.1538	0.1818	0.1429		0.1875	0.2308	0.0909	0.1429
	15	14	13	14		0.0733	-0.3714	-0.3538	0.0786		3.42471	4.18434	4.10921	3.55006		0.375	0.4615	0.4444	0.5385		0.1875	0.2308	0.1111	0.1538		0.1875	0.0769	0.1667	0.1538
	15	14	13	14		-0.0467	0.3	-0.8385	-0.3786		3.49189	6.06264	5.82405	4.10922		0.4375	0.3846	0.3529	0.6667		0.125	0.1538	0.1176	0.1667		0.125	0.2308	0.2353	0.0833
	15	14	12	14		-0.7267	0.2	-0.2583	-0.9		4.18105	3.49189	3.55005	8.5348		0.5	0.6154	0.5	0.5		0.1875	0.1538	0.125	0.1875		0.125		0.25	0.125
	14	14	12	14		-0.3571	-0.9143	-0.0083	-0.2357		3.49189	6.13377	4.42138	3.55006		0.5625	0.4615	0.5625	0.4		0.125	0.1538	0.1875	0.2		0.125		0.125	0.1333
	14	14	12	14		-0.8786	-0.2143	0.7	-0.9429		4.10918	3.87598	4.10918	5.91951		0.5625	0.5385	0.5625	0.4286		0.125	0.2308	0.125	0.1429		0.0625		0.0625	0.2143
	14	14	12	14		-0.6071	-0.0286	-0.6917	-0.2357		6.13573	4.18435	3.84994	3.55006		0.4667	0.5385	0.2667	0.3571		0.1333	0.1538	0.1333	0.2143		0.2	0.1538	0.2667	0.2143
	14	13	16	13		-0.5786	0.8308	-0.5688	-0.4154		3.84994	3.55005	3.49189	3.38003		0.3333	0.4167	0.4667	0.5		0.1333	0.1667	0.1333	0.2143		0.3333	0.1667	0.2	0.1429
	13	13	16	16		-0.9385	0.3692	-0.1125	0.1125		3.49189	3.84995	4.3703	3.84998		0.5333	0.3333	0.5333	0.3846		0.2	0.1667	0.1333	0.2308		0.0667	0.1667	0.1333	0.0769
	13	13	15	13		-0.2154	1	-0.4067	1.1462		3.74997	3.61368	4.3119	4.25813		0.4	0.5	0.6	0.6		0.1333	0.1667	0.1333	0.1333		0.2	0.1667	0.0667	0.1333
	11	13	15	12		-0.8364	-0.4769	-0.4933	-1		8.22282	3.73793	3.84995	3.38003		0.5333	0.5833	0.4667	0.5		0.1333	0.1667	0.2	0.1667		0.2	0.0833	0.1333	0.0833
	16	13	15	12		0.125	-0.4538	-0.6533	0.2417		3.55005	4.18436	6.21902	3.74999		0.4667	0.5	0.5714	0.3125		0.1333	0.25	0.1429	0.1875		0.2	0.0833	0.1429	0.25
	16	13	15	15		-0.55	0.2462	-0.7267	-0.3067		3.49189	7.25385	6.06264	5.91951		0.5333	0.4545	0.4286	0.4375		0.1333	0.2727	0.1429	0.125		0.2	0.1818	0.2143	0.1875
	15	13	15	13		-0.2267	0.4385	-0.7067	-0.7		3.42471	3.55005	3.61368	8.5272		0.5333	0.4545	0.3571	0.5333		0.1333	0.2727	0.1429	0.1333		0.2	0.0909	0.2143	0.1333
	15	12	15	15		-0.7067	0.4083	-0.4467	-0.5333		6.06067	4.25805	3.61368	6.31497		0.4	0.5455	0.5	0.5333		0.2	0.1818	0.1429	0.1333		0.1333	0.0909	0.2143	0.2
	15	12	15	15		0.44	-0.0167	0.4333	-0.5333		3.55005	3.84995	3.74997	6.23245		0.4	0.5455	0.5385	0.4286		0.2667	0.2727	0.1538	0.1429		0.1333		0.1538	0.2143
	15	15	14	14		-0.5	0.2	-0.3929	-0.1571		4.25807	4.10919	3.55005	3.84995		0.5333	0.5	0.5	0.3077		0.1333	0.0625	0.1667	0.1538		0.2	0.1875	0.1667	0.1538
	15	12	14	13		-0.5867	0.4583	0.4643	-1.0538		6.25903	3.84994	4.25809	3.73789		0.5333	0.3333	0.5	0.6154		0.1333	0.1667	0.25	0.1538		0.2		0.0833	0.0769
	14	15	14	13		0.3	-0.4733	0.0929	-1.0231		6.13377	4.25805	8.22282	5.91951		0.5333	0.4118	0.5455	0.4167		0.1333	0.1176	0.1818	0.1667		0.2	0.2353		0.1667
	14	16	14	16		-0.9	-1.0375	-0.2786	-0.6938		5.82405	3.87598	5.40566	3.49189		0.4667	0.625	0.7143	0.5833		0.1333	0.125	0.2143	0.1667		0.0667	0.0625	0.0714	0.0833
	14	15	13	15		-0.6286	0.1067	-0.1154	-0.7267		6.13377	3.49189	8.52295	4.18438		0.3333	0.4375	0.5	0.5833		0.2	0.125	0.1429	0.1667		0.0667	0.125	0.2143	0.1667
	14	14	13	14		-0.8	-0.3429	-0.2538	-0.1571		3.84995	4.18435	3.87599	3.55006		0.3571	0.4667	0.5	0.5		0.2143	0.1333	0.2857	0.2		0.2143	0.2667	0.0714	0.2
	13	13	13	15		-0.3769	-0.6846	-0.3154	-0.0867		3.55005	4.18435	3.84998	6.16057		0.4286	0.4667	0.5	0.4		0.2143	0.1333	0.2143	0.1333		0.1429	0.2	0.0714	0.2
	13	13	12	17		-0.4769	-0.5846	-0.1167	-0.4353		3.55005	3.55005	3.42471	6.23182		0.4286	0.5	0.5333	0.5455		0.1429	0.2143	0.1333	0.1818		0.1429	0.0714	0.0667	0.1818
	13	12	12	15		-0.2	-0.2417	-0.9583	-0.32		3.74997	5.82405	5.91951	3.61369		0.5	0.2857	0.5	0.375		0.1429	0.1429	0.1429	0.1875		0.1429	0.1429	0.1429	0.125
	12	17	12	13		0.1417	0.3471	-0.8167	0.0154		3.84995	4.18435	5.45185	3.84998		0.3571	0.5385	0.5625	0.4615		0.1429	0.1538	0.25	0.2308		0.1429	0.1538	0.1875	0.0769
	12	16	12	15		0.025	-0.2062	-0.8083	-0.28		4.25807	3.55005	3.74999	3.84995		0.5714	0.4167	0.5	0.3333		0.1429	0.25	0.0625	0.1333		0.0714	0.1667	0.25	0.2
	11	15	11	13		-0.9273	-0.7267	-0.4455	-1.2615		3.84995	3.84995	3.38003	3.55006		0.3571	0.3333	0.5625	0.5		0.2857	0.25	0.125	0.2143		0.2143	0.25	0.125	0.0714
	11	15	14	12		-0.9909	-0.36	-0.0143	0.025		3.55005	3.61368	6.22636	3.84995		0.4615	0.4167	0.3333	0.4375		0.1538	0.25	0.2	0.1875		0.1538	0.0833	0.2	0.1875
	11	15	14	16		-0.1636	-0.54	-0.4786	-0.7812		3.55005	6.06264	3.55006	6.15812		0.3846	0.5	0.4	0.4375		0.2308	0.1111	0.2	0.125		0.1538	0.1667	0.1333	0.25
	17	15	16	13		-0.2353	-0.6867	-0.6625	-1		3.61368	5.826	6.15754	3.38003		0.3846	0.4118	0.4667	0.5714		0.1538	0.0588	0.1333	0.1429		0.2308	0.2353	0.1333	0.0714
	17	17	15	15		0.0235	-0.4471	-0.7	-0.02		3.84994	8.22971	4.18438	4.18436		0.3333	0.5	0.5	0.3125		0.1667	0.125	0.2143	0.125			0.1875	0.1429	0.25
	16	16	15	15		-0.8375	0.025	-0.84	-0.74		3.84994	3.84995	3.55006	4.18438		0.4167	0.4375	0.4615	0.4286		0.25	0.1875	0.2308	0.1429		0.0833	0.125	0.0769	0.2143
	15	16	15	14		0.2	-0.5	-1.1133	-0.1857		3.84995	3.38003	7.35657	4.25811		0.3333	0.4375	0.5	0.3571		0.25	0.1875	0.25	0.1429		0.0833	0.25	0.25	0.2143
	15	15	14	13		0.2733	-0.0667	-0.3429	-0.3692		3.61368	3.55005	4.25811	3.49189		0.5	0.375	0.4545	0.3846		0.1667	0.125	0.1818	0.1538		0.0833	0.3125	0.1818	0.1538
	15	15	14	13		0.06	-1.0533	-0.05	0.0077		3.84994	5.28746	3.42471	6.31138		0.4167	0.5	0.5	0.4615		0.1667	0.25	0.1429	0.2308			0.125	0.2143	0.1538
	15	15	14	16		0.1867	-0.1667	-0.2714	-0.1438		3.84995	3.74997	3.49189	6.22636		0.4545	0.5625	0.6429	0.4615		0.2727	0.125	0.1429	0.2308		0.0909	0.125	0.0714	0.0769
	15	15	14	14		-0.4867	-0.4333	-0.4429	-0.5071		3.61368	3.74997	4.18436	3.84995		0.4545	0.5	0.4375	0.3333		0.1818	0.125	0.125	0.1333		0.1818	0.125	0.125	0.2
	15	15	13	14		-0.6067	-0.9067	-0.5692	-0.1429		3.55006	3.92752	3.55006	3.38003		0.3333	0.4375	0.5714	0.4286		0.2	0.1875	0.1429	0.1429		0.2	0.1875	0.0714	0.1429
	15	15	13	14		-0.48	-1.4133	-0.1	0.0643		3.42471	3.42471	4.18438	3.55006		0.4375	0.4375	0.375	0.2857		0.1875	0.1875	0.1875	0.2143		0.1875	0.125	0.25	0.2143
	15	15	12	13		-0.3133	-0.4933	-0.9917	-0.1462		3.61369	3.61368	3.55006	4.18436		0.5833	0.5	0.4667	0.4286		0.1667	0.125	0.1333	0.1429		0.1667	0.1875	0.3333	0.1429
	14	15	17	13		-0.7071	-0.8533	-0.3882	-0.3692		6.15812	3.74997	3.84998	4.18438		0.5	0.5333	0.4286	0.4167		0.1429	0.1333	0.2143	0.25		0.1429	0.0667	0.0714	0.0833
	14	14	16	13		0	-0.2571	-0.0375	0.3846		4.18114	3.84995	3.38003	3.61369		0.5	0.3333	0.5833	0.3571		0.2143	0.1333	0.1667	0.2143		0.2143	0.2	0.1667	0.1429
	14	14	16	13		-0.6786	-1.1929	-0.175	-0.0923		4.18438	5.82213	3.84998	3.84995		0.4286	0.2667	0.4286	0.4286		0.2143	0.2	0.2143	0.2143		0.1429	0.2	0.0714	0.1429
	14	13	16	12		-0.2571	0.3692	0.225	-0.0833		6.22936	3.84995	3.33853	4.36604		0.375	0.4	0.5714	0.5714		0.1875	0.1333	0.1429	0.2143		0.1875	0.2	0.2143	0.1429
	13	13	15	12		0.6154	-0.1077	-0.3067	-0.8		6.31803	5.82405	4.18436	3.87599		0.4667	0.4	0.5	0.4667		0.2	0.1333	0.125	0.2		0.1333	0.1333	0.25	0.1333
	13	13	15	11		0.3077	0.2	-0.8733	0.1364		3.92755	3.55005	3.74999	3.74999		0.5333	0.5333	0.5333	0.4615		0.2	0.2667	0.1333	0.1538		0.0667	0.0667	0.2	0.1538
	13	13	15	11		0.0692	0.0308	-0.1133	0.6		3.49189	4.18435	3.55006	4.18438		0.4375	0.4667	0.3333	0.3846		0.125	0.1333	0.1333	0.1538		0.125	0.2	0.2667	0.2308
	13	13	14	15		-0.5385	-0.5538	0.25	-0.7133		3.61369	8.24295	4.18438	9.44787		0.4	0.5333	0.5333	0.4167		0.2	0.2667	0.1333	0.1667		0.0667	0.0667	0.2667	0.1667
	12	13	14	14		-0.7167	-0.5231	-0.6786	0.6857		3.49189	8.23142	4.18436	4.18438		0.5714	0.3571	0.5	0.5		0.1429	0.0714	0.2143	0.125		0.0714	0.3571	0.2143	0.125
	12	12	14	15		-0.2917	-0.1583	-0.1071	-0.0467		4.18438	5.82405	4.36603	3.42471		0.5	0.4286	0.6429	0.3571		0.2857	0.1429	0.2143	0.1429		0.0714	0.2143	0.0714	0.2143
	12	12	14	14		-0.5167	-0.5167	-0.3571	0.2643		3.55006	3.84994	3.49189	3.84995		0.4545	0.3571	0.6667	0.3333		0.1818	0.1429	0.1667	0.2		0.1818	0.2857	0.0833	0.1333
	12	12	13	14		-1.3333	-1.3	0.0462	0.0357		3.55006	6.22134	3.73789	3.92755		0.5	0.5	0.625	0.4286		0.2143	0.1429	0.1875	0.1429		0.1429	0.1429	0.125	0.2143
	11	12	13	14		-0.4455	-0.1917	-0.2692	-0.3786		6.31497	3.74997	3.84995	4.18438		0.4	0.2857	0.3333	0.3571		0.2667	0.1429	0.2	0.1429		0.2	0.2143	0.2	0.2857
	15	12	12	15		0.1733	0.2167	-1.1333	-0.1533		3.55006	3.55005	3.55006	3.74999		0.4	0.5	0.4	0.4286		0.1333	0.1429	0.2	0.1429		0.2	0.1429	0.2	0.2143
	12	12	11	14		-0.5667	-0.2667	0.1909	-1.3071		3.84995	4.10918	4.18436	3.55006		0.3571	0.5714	0.4667	0.3077		0.1429	0.1429	0.2	0.1538		0.2143	0.0714	0.2	0.2308
	14	12	10	13		-0.5071	-0.5	0.14	-0.3077		3.84998	3.55005	8.54983	6.26879		0.5	0.4286	0.5	0.5		0.2143	0.2143	0.1429	0.125		0.0714	0.1429	0.1429	0.125
	17	11	17	13		0.4	-0.5273	-0.6824	-0.5154		8.50655	8.79811	3.55006	3.49189		0.4615	0.3571	0.4286	0.4375		0.2308	0.1429	0.2143	0.1875		0.2308	0.1429	0.2143	0.125
	17	16	17	15		0.0176	-0.4625	-0.0765	-0.1467		3.84994	3.84995	5.91951	3.55006		0.3571	0.3846	0.5385	0.4		0.1429	0.1538	0.1538	0.1333		0.1429	0.2308	0.1538	0.2667
	17	16	17	13		-0.2471	-0.3062	-0.2706	-0.1308		3.92755	5.82405	4.37037	3.49189		0.5	0.3846	0.4706	0.5714		0.1429	0.1538	0.1765	0.1429		0.2143	0.1538	0.2353	0.0714
	16	16	17	15		-0.55	0.075	0.1	0.0267		3.84998	3.84995	3.73789	3.42471		0.3846	0.3846	0.5625	0.3571		0.2308	0.1538	0.1875	0.2143		0.0769	0.3077	0.125	0.1429
	16	16	17	15		-0.4625	-0.125	-0.2647	0.08		3.55006	3.55005	4.25811	3.47281		0.4615	0.4615	0.375	0.5		0.1538	0.2308	0.125	0.2143		0.2308	0.0769	0.1875	0.0714
	15	16	16	14		-0.1933	-0.1375	-0.4625	-0.5071		4.1811	3.49189	3.84995	3.42471		0.5333	0.6154	0.3333	0.3529		0.2	0.1538	0.2	0.1765		0.2	0.0769	0.2	0.1765
	15	16	16	14		-0.78	-0.275	0.0625	0.25		3.74999	3.55005	3.74999	4.37037		0.4	0.5385	0.5333	0.5		0.0667	0.1538	0.2	0.125		0.2667	0.1538	0.1333	0.125
	15	16	16	14		-0.2933	-0.45	-0.1625	0.3857		4.25811	3.61368	4.10922	4.25812		0.5333	0.3077	0.4667	0.5		0.2	0.1538	0.1333	0.1875		0.1333	0.1538	0.2667	0.0625
	15	15	16	14		-0.36	-0.1333	0.1125	-0.0143		3.84998	3.84995	3.55006	4.18436		0.5	0.3333	0.3333	0.4667		0.2143	0.1667	0.1333	0.2		0.1429	0.1667	0.4	0.2
	15	15	16	15		-0.52	-0.2667	-0.4625	0.3333		3.84998	4.18435	3.49189	3.55006		0.4286	0.4167	0.5333	0.3333		0.2143	0.1667	0.1333	0.1333		0.0714	0.0833	0.2	0.2667
	15	14	16	14		0.1333	0.5571	-0.2063	-0.3714		3.38003	4.18436	3.55006	8.54983		0.5	0.4286	0.4	0.4		0.2143	0.1429	0.2	0.0667		0.1429	0.2143	0.1333	0.2
	15	14	16	14		-0.3133	-0.9357	-0.175	0.0714		5.36107	5.91651	3.74999	5.91951		0.5	0.3333	0.4667	0.2667		0.1429	0.2	0.1333	0.1333		0.2143	0.2	0.2667	0.2
	14	14	16	15		0.5857	-0.6357	-0.3625	0.2067		3.38003	5.91951	4.2581	3.55006		0.6154	0.3333	0.4	0.4286		0.2308	0.1667	0.2	0.1429		0.0769	0.25	0.2	0.2143
	14	14	15	15		0.2929	-0.6357	0.2533	-0.1733		3.55006	4.18436	3.84995	3.74999		0.4615	0.5333	0.5333	0.2857		0.2308	0.1333	0.1333	0.1429		0.1538	0.2	0.1333	0.2143
	14	14	15	12		-0.2714	0.3857	0.0067	-0.1167		3.55006	4.1811	3.55006	3.55006		0.4545	0.4167	0.4286	0.2857		0.2727	0.25	0.2143	0.2143		0.0909	0.25	0.2143	0.2143
	14	14	15	12		-0.9714	0.0357	-0.7533	-0.2417		3.74999	4.18438	4.10922	3.49189		0.4	0.5385	0.5714	0.4286		0.2	0.1538	0.1429	0.1429		0.1	0.1538	0.0714	0.1429
	14	13	15	15		-0.8214	0.3	-1.2733	0		4.18438	6.23182	3.49189	5.91951		0.4	0.5	0.5	0.3077		0.2667	0.1667	0.1429	0.1538		0.1333	0.1667	0.1429	0.1538
	14	13	15	14		-0.5143	-0.0385	-0.78	-0.3286		3.55006	4.18436	3.49189	3.61369		0.3333	0.4286	0.5	0.3846		0.2	0.1429	0.1429	0.2308		0.3333	0.1429	0.2143	0.0769
	14	13	15	14		-0.5071	-0.2615	-0.0133	-0.3429		3.49189	8.53472	4.18438	9.44787		0.6154	0.625	0.4286	0.4167		0.1538	0.1875	0.2857	0.0833		0.0769	0.125	0.1429	0.25
	14	13	15	13		-0.5071	-0.5846	-0.2933	0.0154		3.38003	5.91951	3.55006	3.55006		0.5833	0.4	0.4286	0.5455		0.25	0.2	0.2143	0.1818		0.0833	0.2	0.1429	0.0909
	14	13	15	12		-0.4286	0.1692	-0.8733	-1.475		4.10922	4.10922	3.87599	5.36095		0.6	0.5	0.5	0.4		0.1333	0.0714	0.1429	0.4		0.1333	0.2857	0.1429	0.1
	13	12	15	15		-0.0385	-0.7333	0.28	-0.62		3.74999	3.55006	3.74999	3.92755		0.5385	0.6154	0.5	0.4286		0.0769	0.1538	0.1429	0.2857		0.2308	0.0769	0.1429	0.0714
	13	12	15	15		-0.4	-0.9583	-0.54	0.22		6.15754	3.55006	3.74999	3.87599		0.5833	0.5385	0.4286	0.5333		0.1667	0.1538	0.0714	0.2667		0.0833	0.1538	0.2143	0.0667
	13	12	15	14		-0.4615	0.475	-0.78	-0.65		4.18436	3.55006	5.91951	3.74999		0.5833	0.5	0.5714	0.3333		0.1667	0.1667	0.2143	0.0667		0.1667	0.1667	0.1429	0.2667
	13	11	15	16		-0.2154	-0.1545	-0.5867	-0.925		8.55277	3.84994	3.55006	3.87494		0.5	0.5	0.4615	0.5385		0.1667	0.0714	0.1538	0.3077		0.25	0.2143	0.2308	0.0769
	12	11	15	16		0.3333	-0.8182	-0.32	-0.6938		3.74999	3.42471	3.84998	3.42471		0.375	0.4375	0.3846	0.4545		0.125	0.1875	0.3077	0.1818		0.25	0.125	0.0769	0.0909
	11	14	15	15		-0.2273	0.3643	-1.0133	0.28		3.29496	3.55006	5.45185	3.61369		0.5	0.4286	0.6154	0.3529		0.1875	0.0714	0.2308	0.1765		0.1875	0.2857	0.1538	0.1765
	16	16	15	14		-0.7313	-1.1062	-1.08	-1.05		4.18438	4.10922	3.74999	4.18436		0.4667	0.5833	0.4615	0.3125		0.1333	0.1667	0.1538	0.1875		0.2	0.1667	0.1538	0.25
	16	11	15	14		-0.1125	0.0273	-0.54	-0.3857		3.49189	3.38003	6.31803	4.31192		0.6	0.5	0.5385	0.4375		0.1333	0.25	0.1538	0.125		0.1333	0.125	0.1538	0.1875
	16	17	15	14		-0.85	-1.1059	0.0467	-0.9		3.55006	3.74999	6.31803	3.42471		0.3333	0.375	0.6154	0.4667		0.1333	0.1875	0.1538	0.2		0.3333	0.125	0.1538	0.2
	15	17	15	13		-0.16	-0.5471	-1.0133	-1.0615		3.49189	3.55006	4.18438	3.87599		0.5333	0.4667	0.5	0.4286		0.1333	0.2	0.1667	0.1429		0.1333	0.2	0.25	0.2143
	15	16	15	12		-0.5667	-1.0813	-1.02	-0.4833		3.55006	3.74999	3.84995	3.55006		0.5333	0.4444	0.4167	0.5		0.2	0.1667	0.1667	0.1429		0.1333	0.1667	0.1667	0.1429
	15	16	14	10		-0.36	-0.2062	0.5786	-0.39		3.55006	4.18438	3.55006	3.61369		0.5	0.4375	0.4167	0.4167		0.1429	0.1875	0.1667	0.1667		0.2857	0.25	0.3333	0.0833
	15	15	14	15		-0.9	0.1333	0.1571	-0.5533		3.55006	3.87599	9.49998	4.10922		0.5	0.5385	0.5	0.6154		0.2143	0.1538	0.1667	0.1538		0.0714	0.1538	0.1667	0.0769
	15	15	14	15		-0.5667	0.66	-1.3	-1.1533		3.49189	3.61369	3.84995	3.55006		0.5714	0.5	0.3077	0.3333		0.0714	0.25	0.2308	0.25		0.2143	0.0833	0.2308	0.1667
	15	15	14	14		0.0267	-0.3867	-0.7143	0.0214		4.10922	3.55006	3.55006	3.49189		0.6429	0.3529	0.4615	0.5		0.1429	0.1176	0.2308	0.2		0.1429	0.3529	0.2308	0.1
	15	15	14	12		-0.4	-0.6067	-0.2714	-0.5		3.61369	3.84998	3.87599	3.49189		0.3846	0.4375	0.6154	0.2941		0.1538	0.1875	0.2308	0.1765		0.1538	0.125	0.0769	0.2353
	15	14	14	14		-1.0533	-0.1786	-0.1714	-0.6857		3.74999	3.49189	3.49189	5.91951		0.6154	0.6	0.4667	0.3333		0.1538	0.1333	0.1333	0.1333		0.0769	0.1333	0.1333	0.1333
	15	14	14	13		-0.94	-0.7643	-0.3286	-0.6846		3.42471	3.55006	3.55006	3.92755		0.5385	0.4	0.4286	0.4667		0.1538	0.2	0.2143	0.2667		0.1538	0.2	0.1429	0.0667
	15	14	14	12		-0.5267	0.2357	-1.3929	-0.4333		3.74999	3.38003	4.18436	4.18438		0.3333	0.5333	0.5714	0.4		0.25	0.1333	0.1429	0.1333		0.0833	0.2	0.2143	0.2667
	15	14	14	16		-0.48	-0.4357	-0.6143	-0.2313		6.22936	3.55006	3.49189	3.49189		0.3333	0.4667	0.3571	0.4667		0.1667	0.2	0.1429	0.1333		0.25	0.0667	0.3571	0.2
	15	14	14	14		-0.62	-0.2714	0.0429	0.0643		3.55006	4.18438	3.84995	5.45185		0.5455	0.5	0.375	0.4667		0.1818	0.125	0.1875	0.2		0.0909	0.3125	0.1875	0.1333
	15	14	14	13		-1.3867	-0.3786	-0.7357	0.0308		4.18438	3.55006	3.49189	3.74999		0.6364	0.5	0.5714	0.4286		0.1818	0.1875	0.1429	0.1429		0.0909	0.1875	0.0714	0.2143
	14	13	14	12		-0.1857	-0.6	-0.2429	-0.0833		6.23182	3.84994	3.84995	4.18438		0.5455	0.4	0.3125	0.4286		0.1818	0.1333	0.25	0.1429		0.1818	0.2	0.125	0.2143
	14	13	13	16		-1.05	-0.1385	-0.3077	-0.375		3.74999	6.16118	3.55006	3.84995		0.4667	0.4667	0.4667	0.2857		0.1333	0.0667	0.2667	0.1429		0.1333	0.2667	0.2	0.2143
	14	13	13	15		-0.5643	-0.6538	-0.2385	-0.6533		3.38003	7.35618	3.74999	3.55006		0.4	0.5333	0.3333	0.5		0.2	0.2	0.1333	0.1429		0.2667	0.2667	0.2667	0.1429
	14	13	13	14		0.0143	-0.8385	-1.1308	-0.4857		3.55006	3.55006	4.18438	5.91951		0.4615	0.5	0.5333	0.3571		0.1538	0.1429	0.2	0.1429		0.1538	0.2143	0.2	0.1429
	14	12	13	12		-0.3071	-1.1333	0.0923	-0.4333		3.38003	3.61369	3.42471	3.55006		0.4118	0.5	0.4286	0.4615		0.2353	0.25	0.2143	0.1538		0.2353	0.0833	0.2143	0.2308
	14	11	13	12		-0.6357	-0.1909	-0.3462	-0.125		3.74999	3.74999	3.92755	4.37037		0.4118	0.5294	0.6429	0.4615		0.1176	0.1176	0.1429	0.1538		0.2353	0.1765	0.1429	0.1538
	13	11	12	16		-0.4385	-0.6455	-0.7667	0.0437		3.38003	3.84995	4.10922	3.84994		0.5	0.4375	0.5714	0.4615		0.125	0.125	0.1429	0.1538		0.125	0.25	0.1429	0.1538
	13	10	12	15		0.1308	0.11	-1.2667	-0.2867		8.5272	3.61369	3.87599	5.91951		0.3333	0.375	0.5385	0.4545		0.1333	0.1875	0.1538	0.1818		0.2667	0.125	0.0769	0.1818
	12	16	12	11		-0.325	-0.05	0.1083	0.4636		5.36102	5.91951	3.84994	3.74999		0.4	0.4667	0.4167	0.2		0.2	0.1333	0.1667	0.2		0.2667	0.2	0.1667	0.2
	12	16	12	16		0.575	-0.1125	-0.0583	0.0687		6.23245	3.26049	3.55006	5.91651		0.4	0.5333	0.4167	0.2857		0.1333	0.2	0.1667	0.2143		0.2	0.0667	0.1667	0.1429
	12	16	12	14		-0.4417	-0.1438	-0.7083	0.7071		3.55006	4.18438	3.42471	5.91951		0.4667	0.4	0.5625	0.2857		0.1333	0.1333	0.1875	0.1429		0.2	0.1333	0.1875	0.3571
	12	16	11	15		-0.3667	-0.3188	-1.3545	-0.44		3.26049	6.15754	3.74999	3.55006		0.4667	0.5333	0.5	0.4286		0.2	0.1333	0.125	0.1429		0.2	0.2	0.1875	0.1429
	17	15	16	14		-0.7235	-0.4	-0.0625	-0.1429		3.49189	3.73789	3.49189	3.74999		0.5333	0.5333	0.5333	0.4286		0.0667	0.2	0.1333	0.1429		0.2	0.1333	0.2	0.1429
	16	15	16	14		-0.2062	0.0867	-1.0375	0.4643		3.49189	6.34967	3.55006	3.84995		0.4667	0.6	0.4	0.3333		0.1333	0.2	0.1333	0.2		0.1333	0.0667	0.2	0.2667
	16	15	16	14		-0.0563	-0.1333	-0.2062	-0.35		6.22936	3.84998	4.10922	4.10922		0.4667	0.4667	0.5333	0.5		0.1333	0.2	0.1333	0.1429		0.2	0.1333	0.2	0.2143
	16	15	16	12		-0.55	0.2267	-0.3813	-0.1833		8.55747	4.18438	3.49189	3.49189		0.4286	0.5333	0.6	0.4667		0.1429	0.0667	0.1333	0.1333		0.2143	0.2	0.1333	0.1333
	16	15	16	16		0.0125	-0.8533	-0.8875	0.3188		3.55006	3.87494	3.49189	3.61369		0.4286	0.5714	0.6	0.2857		0.1429	0.2857	0.1333	0.2143		0.2857	0.1429	0.1333	0.2143
	16	15	15	15		-0.1438	0.3	-0.02	-0.3		3.55006	3.87599	3.61369	4.18438		0.4286	0.5714	0.4667	0.3846		0.2143	0.2143	0.2	0.2308		0.0714	0.0714	0.1333	0.1538
	16	15	15	14		-0.35	0.4667	0.4533	0.0071		6.31803	3.84995	6.2288	6.15754		0.5714	0.3077	0.3333	0.4667		0.1429	0.2308	0.1333	0.1333		0.2143	0.2308	0.3333	0.1333
	16	15	15	13		-0.5375	0.3	-0.2667	0.4462		3.84994	4.18438	3.55006	4.18438		0.3077	0.5385	0.4286	0.4667		0.1538	0.1538	0.2857	0.2667		0.3077	0.2308	0.1429	0.0667
	16	15	15	9		-1.0688	-1.0867	-0.5067	-0.4556		5.91951	3.49189	3.55006	3.84994		0.3846	0.3846	0.4286	0.3571		0.1538	0.0769	0.1429	0.1429		0.2308	0.3846	0.2857	0.2143
	16	15	15	16		-0.375	-0.72	-0.1333	0.3		3.74999	3.55006	3.42471	3.55006		0.4615	0.4615	0.4286	0.4706		0.1538	0.1538	0.1429	0.1176		0.2308	0.1538	0.2857	0.1176
	16	15	15	14		-1.4875	0	-0.42	-0.1929		7.36075	3.55006	6.23245	4.25811		0.5385	0.5385	0.5	0.4667		0.2308	0.1538	0.1429	0.2		0.1538	0.0769	0.1429	0.0667
	15	15	15	13		-0.2867	-0.58	-0.6867	-0.2231		3.84998	3.47281	3.84998	3.84995		0.5	0.4615	0.3077	0.4		0.25	0.2308	0.2308	0.1333		0.0833	0.1538	0.1538	0.2
	15	14	15	13		0.0933	0.25	0.0867	-0.9077		3.55006	5.92254	4.18436	4.10922		0.4167	0.4167	0.4615	0.5		0.25	0.0833	0.2308	0.1429		0.1667	0.3333	0.2308	0.2143
	15	14	15	13		-0.52	0.0286	-0.74	-0.7846		3.55006	3.55006	8.54983	3.55006		0.4167	0.4167	0.3846	0.5		0.25	0.25	0.1538	0.1429		0.1667	0.1667	0.2308	0.1429
	15	14	14	14		0.0333	0.2	-0.4286	0.1929		6.26937	4.18438	3.55006	3.49189		0.6667	0.5833	0.5	0.4286		0.1667	0.25	0.1667	0.1429		0.0833	0.0833	0.25	0.2143
	15	14	14	14		-0.5933	-1.05	-0.2	-0.1		3.55006	3.74999	3.42471	5.91951		0.4545	0.4167	0.5	0.3571		0.1818	0.1667	0.25	0.1429		0.1818	0.25	0.0833	0.2143
	15	14	14	13		-0.88	-1.2	-0.3357	-0.0846		3.55006	3.84995	6.22636	3.74999		0.4667	0.3333	0.5	0.4286		0.1333	0.1667	0.25	0.1429		0.2667	0.1667	0.0833	0.1429
	15	14	14	17		-0.48	-0.7	-0.9714	-0.4059		3.84998	3.92755	6.22636	5.91951		0.4167	0.5833	0.5	0.4286		0.25	0.1667	0.25	0.1429		0.0833	0.1667	0.0833	0.1429
	15	14	14	16		0.2067	-0.6786	-0.35	-0.1188		3.49189	5.2898	3.61369	3.49189		0.5714	0.5	0.4545	0.5		0.1429	0.25	0.1818	0.1429		0.0714	0.0833	0.1818	0.2143
	15	14	14	16		-0.0467	-0.2857	-0.5143	-0.9		3.55006	3.55006	4.25811	3.42471		0.25	0.4545	0.3571	0.5714		0.1875	0.2727	0.2143	0.1429		0.25	0.1818	0.2857	0.1429
	15	13	14	15		-0.3933	0.4769	-1.2714	-0.6667		3.84998	4.18439	6.15812	6.35572		0.4	0.5714	0.4286	0.5		0.2667	0.1429	0.1429	0.1429		0.0667	0.2143	0.1429	0.2143
	15	13	14	14		-0.1467	-0.7231	-1.0714	-0.2786		8.54518	3.49189	3.55006	4.25812		0.4	0.6154	0.3125	0.4286		0.0667	0.1538	0.25	0.2143		0.2	0.0769	0.1875	0.0714
	15	13	14	14		-0.5133	-0.6538	-0.1214	-0.6786		3.84998	3.38003	3.42471	6.31803		0.3333	0.4118	0.5714	0.5		0.3333	0.1765	0.2143	0.1429		0.1111	0.2353	0.0714	0.2143
	15	13	14	12		-1.0267	-0.5615	-0.5429	-0.85		3.74999	3.61369	3.55006	3.55006		0.3125	0.4667	0.3333	0.4615		0.125	0.2	0.1667	0.1538		0.25	0.1333	0.1667	0.0769
	15	12	14	14		-0.5267	-0.7917	-0.8643	-0.1714		4.18436	3.38003	3.74999	3.74999		0.3125	0.4286	0.2941	0.5		0.125	0.2143	0.1765	0.1429		0.3125	0.2143	0.1176	0.0714
	15	12	14	13		-0.8733	-0.6917	0.1214	-0.7923		3.49189	8.52295	3.84995	3.74999		0.4	0.4167	0.3846	0.5		0.1333	0.1667	0.1538	0.1429		0.1333	0.0833	0.2308	0.1429
	15	18	14	14		-0.5867	0.1111	-0.15	-0.2357		6.16118	4.18438	5.91951	3.84995		0.3333	0.4667	0.2	0.4286		0.0667	0.1333	0.1333	0.2143		0.2667	0.2	0.2667	0.1429
	15	17	14	16		-0.4	-0.3824	-0.9286	-0.125		3.42471	4.18113	3.49189	3.55006		0.4286	0.5333	0.5	0.5		0.1429	0.2667	0.125	0.1667		0.1429	0.0667	0.1875	0.1667
	15	17	14	15		-0.8267	-0.2118	-0.0214	-0.5333		4.25811	3.84998	4.25812	3.84998		0.4286	0.5	0.4	0.3125		0.1429	0.2143	0.2	0.25		0.1429	0.0714	0.0667	0.25
	15	17	14	13		-1.04	-0.3471	-0.6643	-0.2923		3.84995	4.18114	3.38003	3.84994		0.2857	0.5714	0.4615	0.3846		0.1429	0.2143	0.1538	0.1538		0.2857	0.1429	0.1538	0.3846
	15	17	13	12		0.14	-0.6	-0.4308	-0.2417		3.49189	8.52295	3.84994	4.18436		0.375	0.3846	0.375	0.5833		0.1875	0.1538	0.125	0.1667		0.25	0.2308	0.125	0.0833
	14	16	13	16		0.1786	0.0437	-0.2462	0.1125		3.49189	3.49189	3.38003	3.84994		0.4375	0.5833	0.3333	0.3333		0.125	0.1667	0.2667	0.1667		0.1875	0.1667	0.1333	0.25
	14	16	13	15		-0.1857	0.1625	-0.7769	-1.14		3.74999	3.55006	3.84994	3.55006		0.3571	0.5	0.3571	0.4615		0.1429	0.25	0.1429	0.2308		0.1429	0.0833	0.1429	0.0769
	14	16	13	14		-0.35	-0.5812	-0.3769	-0.95		3.33853	4.18114	4.18436	3.84998		0.4286	0.4375	0.4167	0.3846		0.2857	0.25	0.1667	0.2308		0.0714	0.1875	0.1667	0.0769
	14	16	12	15		-0.5429	-0.5125	0.0833	-0.1933		3.49189	6.15812	3.74999	3.49189		0.5714	0.4375	0.25	0.5		0.2143	0.125	0.0833	0.0714		0.0714	0.25	0.25	0.2143
	14	16	12	16		0.2786	-0.0688	-0.2583	-0.6063		3.55006	3.55006	8.52295	6.16118		0.3077	0.3125	0.4444	0.5385		0.2308	0.3125	0.1111	0.0769		0.0769	0.1875	0.1111	0.2308
	14	16	12	14		-0.7	-0.1813	-0.5167	-0.3429		3.84995	4.18438	3.42471	3.38003		0.3333	0.5	0.375	0.4		0.1667	0.125	0.1875	0.2667		0.1667	0.25	0.125	0.1333
	14	16	12	12		0.0071	-0.925	-0.75	0.375		4.25811	4.18436	6.31803	3.55006		0.4167	0.4375	0.4	0.4615		0.1667	0.125	0.1333	0.2308		0.0833	0.25	0.1333	0.0769
	14	16	11	12		-0.3071	-0.2062	-0.0182	-0.55		6.15812	5.91951	3.42471	3.55006		0.3529	0.5	0.4375	0.4167		0.1176	0.125	0.125	0.1667		0.2353	0.125	0.1875	0.0833
	14	16	12	16		0.1643	-0.4438	0.05	-0.0125		3.74999	6.22936	4.10922	3.55006		0.3333	0.5625	0.4	0.4615		0.1333	0.125	0.0667	0.2308		0.2	0.125	0.2667	0.1538
	14	16	12	15		-0.2	-0.625	-0.7333	-0.72		3.55006	3.55006	3.38003	6.23245		0.4	0.3333	0.3333	0.4615		0.2667	0.2	0.2667	0.1538		0.0667	0.2	0.1333	0.2308
	14	16	19	14		-0.3786	-0.3188	-0.5474	-0.0071		3.55006	3.49189	3.49189	8.5272		0.4	0.6	0.5	0.3571		0.2	0.1333	0.125	0.1429		0.1333	0.2	0.125	0.2143
	14	15	16	14		-1.0714	-0.22	0.1	-1.0429		4.18438	3.84995	6.22636	3.55006		0.3333	0.2857	0.3333	0.4		0.2	0.1429	0.2	0.2		0.1333	0.2857	0.0667	0.2667
	14	15	14	13		-0.9429	-0.0867	-0.3714	0.4692		3.84995	4.10922	3.38003	5.2898		0.4	0.5714	0.4667	0.5714		0.2	0.1429	0.1333	0.2143		0.1333	0.0714	0.1333	0.0714
	14	15	14	15		-0.5571	0.5933	-0.1071	-0.46		3.84995	3.74999	3.92755	3.84995		0.4	0.5	0.4667	0.3846		0.2	0.1429	0.2	0.2308		0.1333	0.0714	0.0667	0.1538
	14	15	13	14		-0.3786	0.0733	-0.9615	-0.6286		6.23245	4.10922	3.38003	3.49189		0.4286	0.5714	0.5	0.4615		0.2143	0.1429	0.1429	0.1538		0.2143	0.1429	0.1429	0.2308
	14	15	12	16		-0.3643	0.22	0.15	-0.4312		3.84998	3.74999	3.61369	7.35657		0.2857	0.4286	0.3571	0.375		0.2143	0.1429	0.1429	0.25		0.2143	0.2857	0.1429	0.25
	13	15	16	14		-0.4846	0.1667	-0.7	-0.4643		3.84995	3.55006	7.35905	5.45179		0.3571	0.3571	0.5714	0.4667		0.1429	0.1429	0.1429	0.2667		0.2857	0.2143	0.1429	0.2
	13	15	15	14		-0.4615	0.0867	-0.8133	-0.5143		3.84994	3.84995	3.55006	3.84998		0.3571	0.3077	0.5	0.3846		0.1429	0.1538	0.1429	0.2308		0.1429	0.3077	0.0714	0.0769
	13	15	14	14		-1.3615	-0.0267	-0.4571	-0.8857		6.15754	4.18438	4.18436	4.18438		0.5	0.4615	0.3846	0.5		0.1429	0.1538	0.1538	0.1667		0.1429	0.1538	0.1538	0.1667
	13	15	14	16		-0.4692	-0.1267	-0.4929	0.2125		4.18438	3.55006	3.74999	3.55006		0.4615	0.3846	0.4615	0.5		0.1538	0.3077	0.1538	0.25		0.2308	0.1538	0.1538	0.1667
	13	15	14	15		-0.8385	0.1133	-0.5214	-0.1333		3.84995	6.22636	4.10922	5.45179		0.3636	0.3846	0.5833	0.4667		0.1818	0.2308	0.1667	0.2667		0.1818	0.1538	0.0833	0.2
	13	15	14	16		-0.0154	-0.0733	-0.9857	-0.3375		3.55006	6.22936	6.22636	5.45179		0.2941	0.4615	0.3333	0.4667		0.2353	0.1538	0.25	0.2667		0.2941	0.3077	0.0833	0.2
	13	15	14	14		-0.4154	-0.2	0.1214	-0.1214		3.49189	6.15812	3.84998	4.18438		0.3529	0.5	0.4	0.5714		0.1176	0.1667	0.2	0.1429		0.2941	0.0833	0.1333	0.2143
	13	15	14	13		0.0769	-0.54	-0.5929	-1.1692		4.18436	3.84998	3.92755	4.18438		0.2941	0.5	0.4	0.6154		0.1176	0.25	0.2	0.2308		0.2353	0.0833	0.1333	0.0769
	12	15	14	16		0.2583	-0.8933	-0.45	0.2625		6.16118	3.74999	3.84998	4.10922		0.375	0.3333	0.2308	0.6154		0.0625	0.25	0.2308	0.1538		0.25	0.1667	0.1538	0.0769
	12	15	14	15		0.2	-0.2933	-0.7214	-0.3733		6.15514	3.55006	5.91951	3.49189		0.4375	0.4545	0.4545	0.6429		0.1875	0.2727	0.1818	0.1429		0.125	0.1818	0.2727	0.0714
	12	15	14	14		-0.075	-1.0867	-0.1714	-0.1		3.74999	6.22636	3.74999	3.55006		0.4	0.4545	0.4	0.4667		0.1333	0.2727	0.0667	0.2		0.2	0.0909	0.2667	0.1333
	12	15	13	11		-0.075	-0.6733	-0.4462	-0.8909		3.49189	3.74999	3.92755	3.55006		0.4	0.4286	0.4	0.3125		0.1333	0.1429	0.1333	0.1875		0.0667	0.2857	0.1333	0.25
	12	15	13	13		-0.3583	-1.0667	-0.7923	0.0231		6.15812	5.40566	3.61369	3.42471		0.3333	0.5625	0.3571	0.5625		0.1333	0.25	0.2143	0.1875		0.2	0.125	0.0714	0.1875
	11	15	13	13		-0.2545	-0.88	-1.2154	-0.4154		3.55006	5.91951	3.84994	3.49189		0.4	0.4545	0.3333	0.6		0.2	0.1818	0.1667	0.1333		0.1333	0.1818	0.4167	0.1333
	11	15	13	13		-1.1727	-0.1933	-1.7077	-0.0692		3.49189	3.84994	3.69898	3.74999		0.5333	0.4	0.6	0.4286		0.1333	0.0667	0.1333	0.1429		0.1333	0.2	0.1333	0.2143
	11	14	13	12		-1.2636	-0.1357	-0.4308	-0.4583		3.55006	3.55006	3.74999	6.22936		0.3333	0.3333	0.3571	0.3333		0.1333	0.25	0.2143	0.2		0.2667	0.1667	0.1429	0.2
	11	14	12	14		-0.4091	-0.4286	-0.6167	-0.6143		3.55006	4.18438	3.84995	6.15812		0.4	0.4667	0.375	0.4667		0.1333	0.1333	0.125	0.1333		0.1333	0.2	0.1875	0.2
	11	14	12	15		-0.2909	0.2071	-0.2417	0.3867		3.84995	3.84995	4.18438	6.31497		0.3571	0.3333	0.5385	0.4706		0.1429	0.2	0.2308	0.1176		0.2857	0.1333	0.0769	0.2353
	10	14	15	14		-1.04	-0.1071	-0.2067	0.4571		5.91951	3.55006	4.18438	5.2898		0.2857	0.3333	0.4545	0.5		0.1429	0.1333	0.2727	0.2143		0.2143	0.3333	0.0909	0.1429
	10	14	15	14		-0.72	-0.1	-0.3133	-0.9429		3.55006	3.33853	4.18436	3.84998		0.4286	0.5714	0.4	0.3333		0.1429	0.1429	0.2	0.2667		0.1429	0.0714	0.2	0.0667
	9	14	15	13		-0.6556	0.4357	0.0133	-0.2231		5.40566	3.84998	5.2898	3.55006		0.5	0.3	0.4667	0.4615		0.2143	0.3	0.2667	0.1538		0.0714	0.2	0.1333	0.2308
	18	14	14	15		0.1556	-1.0143	-0.9929	-0.4933		4.18438	4.18436	3.74999	3.74999		0.5	0.3333	0.3571	0.6154		0.2143	0.2	0.0714	0.1538		0.1429	0.1333	0.2143	0.0769
	17	14	14	12		-0.1765	-0.0714	-0.5571	0.5833		4.18114	3.55006	3.61369	4.10922		0.5	0.2941	0.4167	0.6		0.2143	0.1765	0.1667	0.1333		0.1429	0.2353	0.1667	0.1333
	17	14	14	14		0.3412	-0.1286	-0.3643	0.0429		3.74999	3.74999	4.18438	3.84995		0.4286	0.25	0.4	0.4		0.1429	0.1875	0.2	0.2667		0.1429	0.25	0.2	0.1333
	16	14	14	16		-0.1375	-0.8286	-0.6714	-0.35		3.84995	6.23245	3.74999	6.22636		0.4286	0.3333	0.3125	0.4615		0.1429	0.1333	0.125	0.2308		0.1429	0.2667	0.25	0.1538
	16	14	14	14		-0.5	-0.0714	-1.1429	-0.1786		3.74999	7.35683	6.15812	9.4987		0.3571	0.4286	0.5	0.5		0.1429	0.2143	0.125	0.1429		0.1429	0.1429	0.1875	0.1429
	16	14	13	15		-0.3	-0.0286	-0.5923	0.16		3.49189	3.42471	3.47281	4.18438		0.3846	0.5	0.4375	0.6154		0.1538	0.1429	0.125	0.2308		0.1538	0.1429	0.125	0.0769
	16	14	13	13		-0.5062	0.35	-0.2923	-1.1308		3.55006	6.31742	3.84998	6.23245		0.3846	0.4	0.2667	0.4167		0.2308	0.2	0.2667	0.1667		0.1538	0.2	0.1333	0.1667
	16	14	13	15		-0.1625	-0.75	-0.0154	-0.7333		3.49189	6.22936	3.55006	6.31195		0.4615	0.3333	0.5333	0.3125		0.1538	0.2	0.1333	0.25		0.1538	0.1333	0.1333	0.1875
	16	14	13	14		-0.6812	0.1714	-1.0077	-0.3429		3.49189	3.55006	4.37037	6.31195		0.3846	0.3571	0.5333	0.3125		0.1538	0.2143	0.2	0.25		0.1538	0.1429	0.1333	0.125
	16	14	13	18		-0.875	-0.6929	-0.5385	-0.4833		3.55006	3.42471	5.92254	3.74999		0.4167	0.4286	0.3571	0.4615		0.1667	0.1429	0.0714	0.1538		0.1667	0.1429	0.2857
	16	14	13	15		-1.2	-0.4357	0.0615	-0.5533		4.18438	3.55006	3.42471	8.51418		0.4545	0.4286	0.5	0.4286		0.1818	0.2143	0.2143	0.2857		0.1818	0.0714	0.1429	0.1429
	16	14	13	15		-0.05	-0.6429	-0.3692	0.5133		3.55006	6.23245	3.55006	4.18436		0.4	0.3846	0.3529	0.5		0.2	0.1538	0.1765	0.2222		0.2	0.3077	0.1765	0.1667
	16	14	13	13		-0.5125	-0.6571	-0.7308	-1.0538		3.55006	3.55006	3.55006	6.23245		0.4167	0.4167	0.375	0.4		0.25	0.25	0.125	0.1333		0.1667	0.0833	0.1875	0.1333
	16	14	13	15		0.1375	-0.4357	-0.2846	-0.36		3.55006	3.74999	4.18438	3.55006		0.4286	0.3	0.4375	0.375		0.2143	0.3	0.125	0.25		0.2143	0.2	0.125	0.1875
	16	14	12	15		0.2937	-0.4143	0.5917	-0.18		3.49189	8.52286	3.84995	3.84995		0.5	0.5	0.375	0.4286		0.1429	0.125	0.125	0.2143		0.0714	0.1875	0.25	0.2143
	15	14	12	14		-0.2067	-0.1286	-1.1417	0		4.18436	4.18436	4.10655	3.84994		0.3846	0.3571	0.3333	0.3846		0.1538	0.1429	0.2667	0.2308		0.1538	0.2143	0.1333	0.1538
	15	14	12	15		0.0533	-0.8286	-0.8833	0.4933		3.84998	3.55006	3.29496	3.84995		0.4	0.5	0.4667	0.4167		0.2	0.1429	0.2	0.1667		0.2	0.1429	0.1333	0.1667
	15	14	14	14		-0.0067	-0.4214	0.8429	-0.3357		3.55006	4.10922	3.92755	4.10922		0.2857	0.6154	0.4	0.5		0.1429	0.1538	0.2	0.1429		0.2143	0.0769	0.2667	0.1429
	15	14	12	15		-0.8667	-0.4214	0.3083	-0.38		6.15754	3.42471	3.84995	3.84995		0.4286	0.4545	0.2857	0.4		0.1429	0.1818	0.1429	0.2		0.1429	0.1818	0.2857	0.2667
	15	14	15	12		0.0867	-0.4571	-0.3	-0.75		3.61369	4.10523	3.55006	6.23245		0.5	0.5294	0.4286	0.4667		0.1667	0.1765	0.2143	0.1333		0.1667	0.1176	0.0714	0.2
	15	13	11	16		-0.32	-0.2692	-0.8182	0.0937		3.49189	3.55006	5.2898	3.87599		0.4118	0.4118	0.3571	0.5385		0.2353	0.1765	0.2143	0.2308		0.1765	0.1765	0.2143	0.0769
	15	13	14	15		-0.8867	0.4077	0.0643	0.58		3.33853	3.49189	6.31803	6.15812		0.5	0.5	0.5	0.5		0.1875	0.125	0.2143	0.1667		0.125	0.125	0.1429	0.1667
	15	13	13	14		0.08	-0.1385	0.1769	-0.5929		8.52286	4.2581	3.61369	3.84998		0.4	0.375	0.4615	0.5		0.1333	0.125	0.1538	0.2143		0.1333	0.1875	0.1538	0.0714
	15	13	12	15		-0.26	-0.9077	0.0167	0.2133		3.82608	4.18438	4.25811	3.84995		0.6	0.4667	0.4615	0.3846		0.1333	0.1333	0.1538	0.1538		0.0667	0.2667	0.2308	0.3077
	15	13	15	14		-0.5867	-0.8385	-0.3867	-0.45		3.38003	3.55006	3.33853	3.74999		0.5	0.3333	0.5833	0.6667		0.25	0.0667	0.1667	0.1667		0.0833	0.4	0.0833	0.0833
	15	13	14	13		-0.1333	-0.4923	0.3143	-0.5615		3.55006	3.55006	5.91951	6.15812		0.3333	0.4	0.4545	0.5		0.2	0.2	0.1818	0.1667		0.2	0.1333	0.2727	0.25
	15	13	15	12		-0.9133	-1.1846	-0.0467	0.175		3.42471	3.38003	4.18438	6.23245		0.3333	0.4	0.4	0.4167		0.2667	0.2	0.2	0.1667		0.0667	0.1333	0.2	0.25
	15	13	13	13		-0.5267	0	-0.3	-0.1769		4.18439	5.91951	3.38003	8.54992		0.4615	0.3571	0.375	0.3846		0.1538	0.1429	0.125	0.0769		0.2308	0.1429	0.1875	0.3077
	15	13	15	12		0.0867	-0.4923	-0.6	-0.6333		3.38003	3.74999	3.42471	3.49189		0.4615	0.5	0.3125	0.5833		0.2308	0.1429	0.1875	0.1667		0.0769	0.1429	0.1875	0.0833
	15	13	15	15		-0.84	-0.4154	0.1333	-0.3		3.61369	6.23245	3.74999	8.51418		0.4167	0.4286	0.3571	0.4375		0.1667	0.1429	0.1429	0.25		0.1667	0.2143	0.1429	0.125
	15	13	15	15		-1.1333	-0.2769	-0.1667	-0.48		3.61369	3.74999	3.55006	3.49189		0.3333	0.5	0.3571	0.5		0.1667	0.1429	0.2857	0.1429		0.1667	0.0714	0.1429	0.1429
	15	13	16	12		-0.7867	-0.4846	-0.1625	-0.3833		6.23245	3.49189	3.87599	6.23245		0.3	0.3571	0.5	0.4167		0.2	0.1429	0.25	0.1667		0.3	0.2143	0.0833	0.25
	15	13	15	15		-0.2267	-0.6538	0.62	-1.18		3.74999	3.74999	4.30818	6.15754		0.3333	0.4286	0.4375	0.5833		0.1333	0.0714	0.125	0.1667		0.2667	0.2143	0.1875	0.1667
	15	12	14	15		-0.72	-0.2083	0.3929	-0.4467		4.18113	3.49189	6.15812	6.15812		0.4	0.3846	0.4667	0.5		0.3333	0.1538	0.1333	0.1875		0.1333	0.0769	0.2667	0.1875
	15	12	12	13		-0.18	-0.1667	-1.5583	-0.5538		3.84995	3.38003	6.15812	6.15812		0.4	0.4615	0.4	0.5333		0.1333	0.1538	0.1333	0.2		0.1333	0.2308	0.2	0.1333
	15	12	17	15		-0.1533	-0.5167	0.3647	-0.2467		3.55006	3.49189	8.52708	6.22936		0.3571	0.5385	0.4706	0.4286		0.2143	0.1538	0.1765	0.2143		0.0714	0.0769	0.1765	0.1429
	15	12	17	10		-0.52	-0.2667	-0.1118	-0.52		3.38003	3.55006	4.10922	4.18436		0.5385	0.4615	0.5	0.5		0.2308	0.1538	0.125	0.3333		0.0769	0.0769	0.125	0.0833
	15	12	16	14		-0.34	0.2917	0.3625	-1.0929		3.49189	3.49189	8.54518	3.84998		0.4118	0.5833	0.4	0.4167		0.1176	0.1667	0.0667	0.25		0.1765	0.0833	0.2	0.1667
	15	12	16	16		-0.4267	-0.875	-1	-0.1562		6.15812	3.49189	3.55006	3.74999		0.4118	0.4545	0.2667	0.4667		0.1176	0.1818	0.2	0.1333		0.1765	0.1818	0.2667	0.2
	15	12	15	14		-0.34	-0.7083	0.58	-0.8571		4.18438	4.10655	3.87599	9.49995		0.375	0.5455	0.5333	0.4667		0.125	0.2727	0.1333	0.2		0.1875	0.0909	0.2	0.2
	15	12	15	13		0.52	0.3667	-0.2067	-0.0846		4.18438	3.74999	4.18438	3.74999		0.3333	0.4	0.5333	0.5		0.2	0.2	0.1333	0.1429		0.2	0.2	0.1333	0.2143
	14	12	15	14		-0.0143	-1.1083	0.0867	-1.1357		3.74999	3.55006	3.74999	3.74999		0.3333	0.3125	0.4286	0.6154		0.1333	0.25	0.1429	0.1538		0.2667	0.1875	0.1429	0.1538
	14	11	15	14		-0.2214	-0.4818	0.1467	-0.0571		3.55006	3.74999	6.31497	3.84995		0.3333	0.3846	0.5	0.3846		0.1333	0.1538	0.1429	0.1538		0.2667	0.1538	0.0714	0.2308
	14	11	15	15		0.15	-0.9182	-0.2333	-0.2867		3.38003	3.61369	3.74999	3.49189		0.4	0.4286	0.3571	0.5333		0.1333	0.1429	0.1429	0.1333		0.2	0.1429	0.2143	0.1333
	14	11	14	14		0.2429	0.1545	0.5571	-0.5143		3.84995	3.55006	4.18438	6.23245		0.4667	0.3333	0.4286	0.4667		0.1333	0.2667	0.2857	0.1333		0.1333	0.2	0.0714	0.3333
	14	10	14	12		-0.8929	-0.21	0.1714	-0.475		3.74999	4.10922	3.49189	6.22636		0.5	0.5	0.5	0.6154		0.1429	0.1429	0.1429	0.2308		0.0714	0.0714	0.0714	0.0769
	14	17	14	12		-0.6214	-0.1765	-0.1214	0.025		5.92254	3.55006	3.61369	7.35618		0.4286	0.3077	0.3846	0.5714		0.0714	0.1538	0.1538	0.2143		0.2143	0.2308	0.1538	0.1429
	14	17	14	15		0.4214	-0.0059	0.15	-0.2067		6.15754	3.84995	5.91951	3.84995		0.2857	0.4118	0.4615	0.4375		0.1429	0.1765	0.1538	0.1875		0.2857	0.1765	0.1538	0.1875
	14	17	14	13		0	-0.7471	0.3643	-0.5077		3.42471	5.92254	3.55006	3.55006		0.3846	0.2857	0.4545	0.4375		0.1538	0.0714	0.1818	0.1875		0.1538	0.2857	0.0909	0.25
	14	17	14	16		-0.8714	-0.3647	-0.5857	-0.4125		3.87599	4.31192	6.15812	8.54983		0.375	0.5714	0.4118	0.5333		0.1875	0.1429	0.1176	0.1333		0.125	0.0714	0.1176	0.2
	14	16	14	14		-0.2429	0.2812	-0.5071	-0.2643		3.74999	3.55006	4.18436	3.84994		0.375	0.3846	0.3529	0.4545		0.125	0.1538	0.2353	0.2727		0.1875	0.3077	0.2353	0.1818
	14	16	13	13		-0.0786	-0.3125	0.1462	0.3		4.18436	3.84995	3.49189	6.23245		0.4375	0.5333	0.4118	0.4375		0.1875	0.1333	0.1176	0.125		0.125	0.1333	0.2353	0.1875
	14	16	13	15		0.3071	-0.3438	0.0154	0.0733		5.91651	3.74999	4.1811	6.22636		0.3333	0.4	0.3529	0.5714		0.2	0.0667	0.2353	0.2143		0.2	0.3333	0.2353	0.1429
	14	16	13	13		-0.65	-0.5938	-1.2462	-0.0923		6.31803	3.55006	3.92755	5.91951		0.5333	0.3571	0.5294	0.5		0.1333	0.2143	0.1176	0.1429		0.1333	0.2143	0.2353	0.1429
	14	16	13	14		-0.3786	-1.1438	0.2692	0.0071		6.15812	3.74999	6.22936	6.23245		0.3333	0.3846	0.5	0.4286		0.1333	0.1538	0.125	0.1429		0.1333	0.2308	0.1875	0.2143
	14	15	13	14		-0.1	0.0867	-0.1077	-0.7929		3.55006	3.55006	3.55006	3.84998		0.5333	0.375	0.4375	0.3846		0.2	0.1875	0.125	0.2308		0.0667	0.125	0.3125	0.1538
	14	15	13	13		-0.7	-0.9	-0.6077	0.4231		5.45185	4.10922	3.74999	6.15754		0.4667	0.4286	0.3125	0.5385		0.2	0.2143	0.125	0.1538		0.1333	0.1429	0.1875	0.1538
	14	15	13	14		-0.9857	0.62	-1.5846	-0.1214		4.18438	3.49189	3.74999	3.55006		0.4	0.5	0.3125	0.3846		0.1333	0.1429	0.125	0.1538		0.2667	0.1429	0.3125	0.3077
	14	15	12	14		-0.3357	-0.0667	0.65	-0.1		3.55006	3.55006	4.10922	6.23245		0.3333	0.5	0.5	0.5385		0.2	0.1429	0.125	0.1538		0.1333	0.1429	0.1875	0.1538
	14	15	12	17		-0.9286	-0.3733	-1.0583	0.1412		3.26049	3.55006	3.74999	7.36011		0.4667	0.5	0.375	0.5		0.2	0.1429	0.1875	0.25		0.0667	0.1429	0.125	0.1667
	14	15	12	13		-0.5214	-0.56	-1.0083	-0.4615		3.33853	3.55006	3.49189	3.84998		0.6	0.4615	0.4375	0.4167		0.1333	0.1538	0.125	0.25		0.1333	0.2308	0.25	0.0833
	14	15	11	14		-1.1714	-0.6	0.3091	-0.4286		3.92755	3.55006	5.2898	3.84994		0.5333	0.3846	0.4375	0.5455		0.1333	0.1538	0.1875	0.1818		0.1333	0.2308	0.1875	0.1818
	14	15	11	15		-0.4286	-0.4267	0.1545	0.1267		4.18438	3.49189	3.61369	3.84995		0.4	0.5833	0.3333	0.3636		0.1333	0.1667	0.1333	0.3636		0.1333	0.0833	0.2	0.1818
	14	15	18	13		-0.1786	-0.2467	0.2556	-0.5385		6.16057	3.84995	3.74999	6.23245		0.4	0.3333	0.4	0.5333		0.1333	0.2222	0.1333	0.1333		0.2	0.2222	0.2	0.1333
	14	15	17	15		0.35	-0.6333	-0.0294	-0.0467		4.47938	3.84995	3.87599	3.84995		0.5333	0.4375	0.4	0.5		0.2	0.125	0.2	0.2		0.0667	0.1875	0.1333	0.1
	13	15	16	13		0.1462	-0.04	0.1188	-1.1923		4.18438	3.73789	3.69898	3.74999		0.4286	0.5333	0.4667	0.6		0.1429	0.1333	0.2	0.2		0.2143	0.2	0.0667	0.1333
	13	15	16	12		-0.4308	-0.5333	0.0437	-0.1583		3.49189	3.49189	3.49189	3.87599		0.5714	0.4667	0.4667	0.4667		0.1429	0.1333	0.2	0.1333		0.0714	0.0667	0.0667	0.1333
	13	15	16	13		-0.0846	-0.2	-0.45	0.3		3.49189	6.26937	3.74999	3.38003		0.5714	0.4667	0.4	0.375		0.1429	0.1333	0.1333	0.1875		0.1429	0.1333	0.2	0.25
	13	15	16	12		-0.0923	-0.3067	0.3437	-0.625		3.61369	3.92755	4.18438	5.91951		0.3571	0.5333	0.3333	0.3571		0.1429	0.2	0.2	0.1429		0.2143	0.1333	0.2	0.2857
	13	15	16	14		-0.6615	0	0.3938	-0.3071		3.84995	3.38003	3.33853	3.49189		0.4286	0.3571	0.4667	0.6		0.2143	0.2143	0.2	0.1333		0.1429	0.1429	0.1333	0.1333
	13	15	16	14		-0.7	-0.0867	-0.1188	-0.2		3.49189	3.55006	3.55006	3.84995		0.5	0.3571	0.4	0.4286		0.1429	0.2143	0.1333	0.1429		0.0714	0.1429	0.2667	0.3571
	13	15	15	15		-0.6	-0.6333	-0.3733	0.22		3.74999	3.47281	3.42471	3.84998		0.5385	0.4286	0.4	0.3571		0.1538	0.2143	0.2	0.2143		0.0769	0.0714	0.1333	0.2143
	13	15	15	14		-0.9154	-0.4133	-0.0133	-1.2929		3.55006	3.84994	3.38003	3.74999		0.3077	0.3077	0.4667	0.3333		0.1538	0.1538	0.2	0.1333		0.2308	0.1538	0.0667	0.2
	13	15	15	15		-0.1	-0.42	-0.14	-0.88		3.55006	6.22936	6.22936	8.5272		0.4167	0.4118	0.4667	0.5333		0.25	0.1765	0.1333	0.1333		0.25	0.1176	0.1333	0.1333
	13	15	15	14		-0.3	-0.1867	0.08	-0.8571		3.84994	3.55006	3.61369	3.84995		0.25	0.4118	0.4	0.2857		0.1667	0.1765	0.1333	0.2143		0.25	0.1765	0.1333	0.2143
	12	15	14	14		-0.0583	-0.2533	0.6571	-0.3071		3.84998	3.55006	3.29496	3.74999		0.3333	0.375	0.5333	0.4		0.25	0.1875	0.1333	0.2		0.0833	0.125	0.0667	0.2667
	12	15	14	14		-1.2667	-0.76	0.7071	0.55		3.55006	3.84995	3.47281	5.91651		0.3333	0.375	0.5333	0.2857		0.3333	0.125	0.2	0.2857		0.0833	0.125	0.0667	0.2857
	12	15	14	15		-0.3	-0.46	0.9643	0.4667		3.49189	3.55006	3.98006	6.23245		0.4667	0.4667	0.4	0.3571		0.1333	0.1333	0.2	0.2143		0.1333	0.2	0.1333	0.2143
	12	15	14	13		0.0833	-0.3267	0.15	-0.3154		3.38003	4.10923	3.61369	3.84994		0.375	0.4667	0.3333	0.3571		0.1875	0.2	0.1333	0.1429		0.25	0.1333	0.2	0.2857
	12	15	14	14		-0.3083	-0.18	0.1857	-0.2214		3.55006	4.25813	3.29496	4.18438		0.3125	0.4	0.5333	0.5714		0.25	0.1333	0.1333	0.2857		0.1875	0.1333	0.0667	0.0714
	12	15	14	14		-0.2417	-0.68	-0.05	-0.5286		3.84995	4.18438	3.33853	3.84995		0.4	0.5455	0.4667	0.3846		0.1333	0.1818	0.2	0.1538		0.1333	0.0909	0.0667	0.2308
	12	15	14	16		-0.925	-1.26	-1.1714	-0.5688		4.10922	3.74999	3.84995	5.91951		0.5	0.375	0.2857	0.4286		0.1429	0.125	0.2143	0.1429		0.0714	0.25	0.2857	0.2143
	11	15	13	14		0.5091	-0.9733	-0.4308	0.8286		7.35552	6.15812	5.92254	8.55739		0.3571	0.375	0.3571	0.4286		0.2143	0.125	0.0714	0.2143		0.2143	0.25	0.3571	0.2143
	11	15	13	14		-0.9727	-0.1267	0.2077	-0.6857		3.74999	3.55006	6.31497	3.49189		0.4615	0.3125	0.5	0.5714		0.1538	0.25	0.0714	0.2143		0.1538	0.1875	0.1429	0.0714
	11	15	13	14		-0.6727	-0.3933	-0.0154	0.2643		3.49189	3.84995	3.38003	4.18438		0.4118	0.375	0.3571	0.5714		0.1176	0.125	0.1429	0.1429		0.1765	0.125	0.1429	0.2143
	11	15	13	13		0.0909	0.2467	-0.7	-0.7		6.22936	4.18436	3.55006	3.55006		0.375	0.4	0.4286	0.4		0.125	0.2667	0.2143	0.2		0.3125	0.2	0.2143	0.2
	11	15	13	16		-0.7273	-0.74	0.1231	-0.4188		3.55006	4.18438	3.55006	5.36102		0.3333	0.3333	0.2857	0.4667		0.2	0.1333	0.2143	0.2		0.2	0.2	0.2143	0.2
	11	14	13	13		-0.7636	0.1643	-1.1231	-0.7077		3.38003	5.91951	3.55006	4.18436		0.4667	0.4	0.2857	0.4286		0.2	0.1333	0.2143	0.2857		0.2	0.1333	0.1429	0.0714
	11	14	13	14		-0.7273	-0.2786	-0.2154	-0.8		3.84995	3.74999	3.87599	5.36102		0.2857	0.2	0.5714	0.4		0.2143	0.1333	0.2143	0.2		0.2857	0.2667	0.0714	0.2
	7	14	12	15		1.0857	0.3929	0.2417	-0.5333		3.84995	3.29496	3.87599	6.31195		0.3571	0.4	0.4286	0.5714		0.2143	0.2	0.2143	0.2143		0.1429	0.1333	0.1429	0.1429
	15	14	12	15		-0.5267	-0.4286	-0.55	-0.3267		3.55006	3.55006	3.55006	5.91951		0.3333	0.3333	0.3571	0.4615		0.25	0.1333	0.1429	0.1538		0.1667	0.2667	0.2143	0.1538
	14	14	12	13		-0.5714	-0.1214	0.5167	-0.4923		8.5187	3.74999	3.61369	3.55006		0.5	0.3333	0.3571	0.6154		0.1667	0.1333	0.2143	0.1538		0.1667	0.3333	0.0714	0.1538
	14	14	12			-0.6429	-0.5	-1.6417			3.33853	3.55006	3.55006			0.4706	0.3333	0.3571			0.1176	0.1333	0.2857			0.1765	0.2667	0.1429
	14	14	11			-0.4857	0.2143	-0.6364			4.18436	3.42471	3.84995			0.3125	0.4	0.3846			0.25	0.2667	0.1538			0.1875	0.0667	0.1538
	14	14	11			-0.2857	-0.7714	0.9727			3.84995	3.55006	4.18438			0.3125	0.5333	0.3846			0.1875	0.1333	0.1538			0.125	0.0667	0.2308
	15	14	10			0.0667	-0.5357	1.2			6.31803	3.84995	3.87494			0.5	0.3333	0.5385			0.125	0.1333	0.3077			0.125	0.2667	0.0769
	14	14	9			-0.5214	-0.3214	0.0444			3.49189	3.55006	3.55006			0.4375	0.4667	0.3077			0.125	0.0667	0.2308			0.25	0.2	0.2308
	13	14	15			-0.4615	0.1643	-0.16			3.55006	5.92254	3.84994			0.25	0.2143	0.3846			0.1875	0.0714	0.0769			0.1875	0.2857	0.2308
	13	14	14			-0.7077	-0.7286	-0.0286			6.31803	4.18438	3.84998			0.4375	0.4286	0.3333			0.125	0.1429	0.25			0.1875	0.2857	0.0833
	13	14	13			-0.6	-0.1286	-0.1077			3.87599	3.55005	3.87599			0.4375	0.3571	0.5			0.1875	0.1429	0.25			0.1875	0.2143	0.0833
	12	14	13			0.1083	-0.9857	-0.4538			3.82608	3.49189	6.2288			0.5	0.5714	0.3333			0.125	0.1429	0.1667			0.125	0.0714	0.25
	10	14	15			-0.98	-0.5143	-1.56			3.49189	4.31192	3.84998			0.375	0.5714	0.25			0.0625	0.1429	0.25			0.1875	0.0714	0.1667
	16	14	12			-0.55	-0.0714	-1.3083			4.31192	3.38003	6.22936			0.625	0.5714	0.4167			0.125	0.1429	0.25			0.0625	0.1429	0.1667
	15	14	13			0.4933	0.0143	-1.1231			6.15812	3.55006	6.31497			0.4667	0.5	0.5455			0.1333	0.1429	0.1818			0.2	0.1429	0.0909
	14	14	14			-0.4857	-0.6071	-0.1714			3.84995	4.25811	3.49189			0.3333	0.4286	0.5			0.2	0.1429	0.1429			0.2	0.1429	0.2143
	14	14	12			-0.3143	0	-1.075			3.84998	6.23245	3.74999			0.4	0.3846	0.4615			0.2	0.1538	0.2308			0.1333	0.3077	0.1538
	14	14	14			-0.45	-0.7071	0.2857			5.91951	4.18436	5.91951			0.3333	0.3846	0.4			0.1333	0.1538	0.1333			0.2	0.1538	0.1333
	14	14	13			-0.4571	-1.3429	-0.5231			6.15812	3.49189	4.18438			0.4667	0.5385	0.5			0.1333	0.1538	0.1429			0.1333	0.0769	0.2143
	13	14	15			0.5077	-0.3714	-0.6133			3.92755	4.37037	3.61369			0.4667	0.5385	0.3846			0.2	0.1538	0.2308			0.1333	0.1538	0.0769
	13	14	16			-0.5385	-0.3714	0.2			3.55006	3.55006	3.61369			0.3333	0.4167	0.4667			0.2	0.25	0.2			0.1333	0.0833	0.1333
	13	14	15			0.0615	-0.6286	-0.3667			3.74999	7.35547	3.87494			0.2667	0.5833	0.5625			0.1333	0.25	0.1875			0.2667	0.0833	0.125
	12	14	14			0.1417	-0.7143	-0.2429			3.55006	6.16118	3.49189			0.2667	0.4667	0.4			0.2	0.0667	0.1333			0.2	0.2	0.2
	12	14	14			-0.725	-0.65	0.1			6.31803	3.49189	3.55006			0.4667	0.375	0.3333			0.1333	0.1875	0.2			0.2	0.125	0.2667
	12	14	14			-0.9917	0.2429	0.3429			3.74999	3.92755	5.2898			0.3333	0.5	0.4667			0.1333	0.25	0.2			0.2	0.0833	0.2
	11	14	15			0.6364	-0.9786	0.4933			3.38003	4.10922	3.55006			0.4667	0.4667	0.4			0.1333	0.2	0.2			0.2	0.1333	0.2667
	16	14	15			-1.5625	-0.2214	0.04			6.31138	3.55006	5.2898			0.5333	0.4667	0.4			0.2	0.1333	0.2			0.1333	0.2	0.1333
	15	14	15			-0.7133	-0.1714	0.1867			4.18436	4.18438	3.55006			0.4	0.4	0.4			0.2	0.1333	0.2			0.2	0.1333	0.1333
	15	14	15			-0.28	-0.4929	-0.18			3.55006	3.55006	3.74999			0.4667	0.2857	0.3846			0.2	0.2143	0.0769			0.0667	0.2857	0.3077
	15	13	13			0.1333	-0.4615	-1.1385			3.38003	3.47281	3.98006			0.5333	0.3571	0.5			0.1333	0.2143	0.1667			0.2	0.1429	0.0833
	15	13	10			-0.1333	-0.9	0.19			6.31803	3.55006	3.55006			0.4	0.3158	0.5			0.1333	0.1579	0.25			0.2	0.2105	0.0833
	15	13	15			-0.0867	-0.1385	-0.1467			4.10922	3.33853	3.26049			0.6	0.4444	0.5			0.1333	0.1667	0.1875			0.1333	0.1667	0.1875
	15	13	13			-0.66	-0.6692	-0.5846			4.10922	3.74999	7.35722			0.5333	0.25	0.5			0.0667	0.1875	0.1875			0.2	0.25	0.125
	14	13	15			-0.1429	0	0.1			5.91951	3.55006	6.22636			0.4	0.375	0.375			0.1333	0.125	0.1875			0.2	0.3125	0.125
	14	13	15			0.5857	-0.4077	-0.5267			3.74999	6.15812	3.55006			0.3571	0.375	0.4			0.0714	0.1875	0.2			0.2857	0.3125	0.1333
	14	13	16			-0.6429	-0.1385	-0.4938			8.52295	3.49189	3.38003			0.4286	0.5	0.4			0.1429	0.125	0.2			0.2143	0.1875	0.1333
	14	13	13			-0.9571	0.2846	-1.5923			3.49189	3.74999	3.92755			0.4286	0.4	0.4			0.2143	0.1333	0.1333			0.1429	0.1333	0.2
	14	13	17			-0.3143	-0.1154	0.1412			3.49189	3.49189	4.42638			0.4286	0.4	0.5333			0.2143	0.1333	0.1333			0.1429	0.2	0.2
	13	12	16			0.0154	0.9	0.025			3.55006	3.74999	3.55006			0.2857	0.3333	0.4			0.2143	0.1333	0.1333			0.2857	0.2	0.2
	13	12	15			0.6615	-1.1167	-0.3			3.49189	4.42142	3.61369			0.4286	0.4667	0.4			0.1429	0.3333	0.2			0.0714	0.0667	0.1333
	13	12	15			0.0462	-1.2667	-0.7333			3.55006	4.25811	3.74999			0.4286	0.3571	0.4286			0.1429	0.1429	0.1429			0.1429	0.2143	0.1429
	13	10	15			0.0692	0.29	-0.6533			3.49189	3.55006	3.92755			0.5	0.3571	0.5			0.1429	0.1429	0.1429			0.1429	0.3571	0.1429
	13	14	15			-0.5846	-0.1	-1.2733			3.55006	6.31497	5.91951			0.2857	0.5	0.4286			0.1429	0.1429	0.1429			0.2857	0.1429	0.1429
	13	13	15			-0.8462	-0.2769	0.1067			6.15812	3.49189	3.55006			0.3571	0.5714	0.3846			0.1429	0.1429	0.1538			0.2143	0.0714	0.2308
	13	15	15			0.3308	-0.24	-0.3133			3.55006	4.10922	3.74999			0.5	0.5	0.4615			0.1429	0.1429	0.1538			0.2143	0.1429	0.1538
	12	15	14			-1.4417	-0.52	-0.4214			3.42471	4.18438	3.84998			0.4286	0.5	0.25			0.2143	0.1429	0.25			0.0714	0.2143	0.1667
	12	15	12			-0.4583	-0.54	-0.1917			4.37037	6.31497	3.84995			0.5	0.5385	0.3333			0.2143	0.1538	0.1667			0.1429	0.1538	0.1667
	12	14	11			-0.625	-0.0071	0.1273			3.42471	3.74999	4.25811			0.4286	0.4615	0.5			0.2143	0.1538	0.1667			0.0714	0.1538	0.1667
	12	13	15			-0.7083	0.3	-0.6467			3.47281	3.74999	5.36102			0.5	0.4615	0.4			0.1429	0.0769	0.3			0.2143	0.2308	0.2
	12	12	14			-0.2083	0.1167	-0.1429			4.18436	6.31803	3.74999			0.4286	0.5	0.375			0.2143	0.1667	0.1875			0.2143	0.25	0.1875
	11	10	16			-0.5636	-0.52	-0.175			3.74999	5.28988	3.26049			0.5385	0.375	0.5			0.1538	0.25	0.1875			0.1538	0.25	0.125
	14	15	15			-1.1786	0.4933	0.28			3.33853	3.74999	3.74999			0.4615	0.2778	0.4375			0.1538	0.1111	0.125			0.1538	0.2222	0.1875
	12	14	14			0.2667	-0.5571	-0.4786			3.29496	4.18436	4.18436			0.5385	0.3529	0.375			0.2308	0.1765	0.25			0.0769	0.2353	0.1875
	14	13	12			-0.7	-0.5846	-0.5			4.18436	3.74999	8.54984			0.4615	0.2941	0.5			0.1538	0.1176	0.0625			0.1538	0.1176	0.1875
	17	13	16			-0.4294	-0.5846	-1.0875			3.38003	3.49189	5.91951			0.4615	0.4118	0.2667			0.1538	0.1176	0.1333			0.0769	0.1176	0.2
	13	16	15			0.3615	0.0625	0.2733			3.84995	3.55006	5.91951			0.3077	0.4706	0.4			0.1538	0.1176	0.1333			0.1538	0.1176	0.2667
	16	16	15			0.6	-0.825	-0.2133			3.49189	5.92254	3.74999			0.4615	0.3125	0.4			0.1538	0.0625	0.1333			0.0769	0.3125	0.1333
	14	15	15			-0.2429	-0.2733	-0.5533			3.55006	3.84995	4.10655			0.4615	0.375	0.4667			0.1538	0.125	0.2			0.2308	0.1875	0.1333
	14	15	14			-0.5143	-0.1067	-0.4786			8.55747	3.38003	3.61369			0.3333	0.4375	0.3333			0.25	0.1875	0.2			0.25	0.125	0.1333
	15	15	14			0.4133	-0.5867	0.2643			3.84995	4.10922	3.92755			0.4167	0.5625	0.4			0.1667	0.125	0.1333			0.1667	0.1875	0.2
	11	15	13			0.2636	-0.14	-0.3385			4.18438	3.74999	6.23245			0.4167	0.3125	0.4667			0.1667	0.125	0.0667			0.1667	0.1875	0.2667
	15	15	16			-0.3333	-0.6467	0.0375			4.18438	3.74999	4.18438			0.4167	0.375	0.3333			0.1667	0.125	0.1333			0.1667	0.1875	0.2
	15	15	15			-1.18	-0.86	-0.14			3.74999	3.82608	4.18442			0.3333	0.5625	0.4			0.1667	0.125	0.2667			0.0833	0.125	0.2
	14	14	15			-0.2	0.1	0.3933			3.74999	3.74999	3.84998			0.4545	0.4375	0.2857			0.1818	0.125	0.2143			0.1818	0.1875	0.0714
	16	14	15			0.375	0.1143	-0.6733			3.29496	6.15812	6.15812			0.5455	0.4375	0.3571			0.1818	0.125	0.1429			0.0909	0.1875	0.2143
	14	14	14			0.7786	-0.7357	0.0714			4.18436	3.38003	3.38003			0.5455	0.375	0.3571			0.1818	0.25	0.2143			0.0909	0.125	0.2143
	12	14	14			-0.35	-0.2071	-0.5357			4.18438	3.74999	4.10922			0.4545	0.375	0.5714			0.1818	0.125	0.1429			0.1818	0.125	0.1429
	13	14	14			-1.5154	-0.0286	-0.6357			3.74999	3.74999	3.49189			0.3636	0.4	0.3571			0.1818	0.1333	0.0714			0.0909	0.2	0.2143
	13	14	13			-0.5308	-0.1929	-1.1615			4.18436	6.31803	3.92755			0.5	0.4667	0.5			0.2	0.1333	0.1429			0.1	0.2667	0.1429
	12	14	12			-0.2417	-0.9429	0.3333			3.55006	5.36107	3.38003			0.4	0.2667	0.6429			0.3	0.2	0.1429			0.1	0.3333	0.0714
	12	14	12			-0.7583	0.05	-0.2417			3.55006	3.84995	6.37932			0.4444	0.2667	0.5714			0.2222	0.2	0.1429			0.1111	0.1333	0.1429
	14	13	16			-0.2286	-0.1692	-0.2688			3.61369	3.84995	4.18438			0.4	0.3333	0.5			0.2	0.1333	0.1429			0.2667	0.2	0.2143
	14	13	15			-1.0071	-0.4308	-0.2933			3.49189	5.91951	3.47281			0.4286	0.3333	0.3571			0.1429	0.1333	0.1429			0.2143	0.2	0.1429
	18	12	15			-0.6167	-0.8	-0.16			4.10922	3.55006	6.23245			0.375	0.3333	0.5			0.1875	0.1333	0.0714			0.25	0.2667	0.2143
	15	12	16			0.44	-0.5417	-0.025			3.74999	3.55006	3.61369			0.4118	0.4	0.2857			0.1176	0.1333	0.2143			0.1765	0.2667	0.2143
	17	12	16			-0.4647	-0.9917	-0.4625			3.55006	3.49189	3.84995			0.3125	0.4	0.2857			0.125	0.1333	0.1429			0.3125	0.2	0.1429
	16	11	16			0.2125	-0.2273	-0.3125			4.10922	3.55006	4.18436			0.5625	0.4667	0.5714			0.1875	0.1333	0.1429			0.0625	0.2	0.0714
	16	10	15			-0.4	0.22	-0.1467			8.50651	3.42471	3.61369			0.4375	0.4667	0.4286			0.1875	0.1333	0.1429			0.125	0.2	0.1429
	16	18	15			-0.725	0.2056	-0.5467			3.55006	3.42471	6.15754			0.4	0.4	0.5			0.2	0.1333	0.1429			0.1333	0.1333	0.0714
	15	16	15			0.42	0.2	-1.1533			4.18113	3.38003	3.84998			0.5333	0.4	0.3077			0.2667	0.2	0.2308			0.0667	0.1333	0.0769
	15	16	14			0.4867	-0.7438	0.0071			4.18438	3.87599	4.18438			0.4	0.5333	0.4615			0.2	0.1333	0.1538			0.1333	0.1333	0.1538
	15	15	14			0.1933	-0.6133	-0.7429			3.61369	3.38003	4.10922			0.3333	0.4667	0.5385			0.2	0.1333	0.1538			0.2	0.2	0.1538
	15	15	17			-0.2667	0.0267	-0.7118			6.15812	3.33853	6.22936			0.5	0.5333	0.4615			0.1429	0.1333	0.1538			0.2143	0.0667	0.1538
	15	14	16			0.26	-0.6286	-0.7062			3.82608	4.10922	6.15754			0.6429	0.5333	0.4167			0.1429	0.1333	0.1667			0.0714	0.2	0.25
	15	14	15			-0.6867	-0.45	-0.6667			3.49189	4.18438	3.55006			0.3571	0.6	0.3333			0.1429	0.1333	0.25			0.1429	0.0667	0.1667
	14	14	15			-1.1214	-0.5214	0.3067			3.74999	3.42471	3.38003			0.5385	0.4	0.4167			0.1538	0.2667	0.25			0.0769	0.0667	0.1667
	14	14	15			-0.6071	-0.2286	-0.7867			6.15812	5.91951	4.18436			0.4615	0.3333	0.4167			0.1538	0.1333	0.1667			0.1538	0.1333	0.1667
	14	14	15			-0.8	-0.6643	-1.0733			3.74999	3.74999	4.18438			0.4615	0.5	0.3636			0.1538	0.1429	0.1818			0.0769	0.1429	0.1818
	13	13	14			-0.3923	0.9692	-0.3714			3.84998	6.22636	6.31742			0.4615	0.3571	0.5714			0.2308	0.2143	0.1429			0.0769	0.1429	0.2143
	13	13	14			-0.7231	-0.6769	-1.3714			3.42471	6.23245	5.91951			0.4167	0.3571	0.3571			0.25	0.1429	0.1429			0.0833	0.2143	0.2143
	13	13	14			-0.0846	-1.0538	0.2571			6.22936	6.23245	3.61369			0.4167	0.3571	0.3846			0.25	0.1429	0.1538			0.1667	0.2143	0.3077
	16	12	14			-0.075	0.3333	-1.1786			3.74999	6.23245	3.84994			0.3333	0.4286	0.3333			0.1667	0.1429	0.1667			0.2222	0.2143	0.25
	14	12	14			-0.95	-0.2083	-0.8286			3.84995	5.91951	3.84994			0.2941	0.2857	0.3333			0.1765	0.1429	0.1333			0.1765	0.2143	0.2667
	14	12	13			-0.5286	-1.35	-0.2462			3.55006	4.18439	3.61369			0.3529	0.4286	0.4667			0.1176	0.2857	0.2			0.2941	0.0714	0.2
	14	12	13			-0.2071	-0.9917	-0.1			3.74999	3.55006	9.58148			0.375	0.4286	0.5833			0.125	0.1429	0.1667			0.1875	0.1429	0.1667
	16	14	11			0.0437	-0.6214	-0.6455			6.16118	4.18438	6.22936			0.4375	0.5	0.5			0.0625	0.1429	0.125			0.25	0.2143	0.125
	16	16	16			-0.0188	-0.6688	-0.6938			3.55006	6.15812	3.38003			0.3125	0.5714	0.4286			0.1875	0.1429	0.2143			0.1875	0.1429	0.2143
	15	14	16			0.2733	-0.1	-0.9875			3.55006	4.18436	3.74999			0.375	0.4286	0.4286			0.1875	0.1429	0.1429			0.125	0.2857	0.1429
	15	13	16			-0.4267	-0.5769	-0.5188			3.55006	3.29496	6.31803			0.3125	0.4286	0.6154			0.1875	0.1429	0.1538			0.1875	0.2143	0.1538
	15	14	15			-0.9067	0.1071	-0.68			3.49189	3.55006	3.55006			0.5	0.3571	0.5			0.125	0.1429	0.1667			0.125	0.2857	0.25
	15	14	15			-0.7067	-0.2357	-0.6067			3.38003	3.38003	6.22579			0.4375	0.4286	0.4167			0.25	0.2857	0.25			0.0625	0.1429	0.0833
	15	14	15			-0.5667	-1.3786	-0.42			3.33853	3.55006	3.42471			0.5625	0.4286	0.4706			0.1875	0.1429	0.1765			0.0625	0.2143	0.2353
	14	14	15			-0.4071	-0.5714	-0.4533			3.61369	4.18436	6.31497			0.375	0.4286	0.5333			0.125	0.2143	0.1333			0.25	0.1429	0.0667
	14	14	15			-0.0214	-0.3857	-0.1533			4.25812	4.25813	6.22936			0.375	0.5	0.4167			0.3125	0.1429	0.1667			0.125	0.1429	0.1667
	14	14	15			0.5	-0.85	-0.4267			3.84995	4.18438	3.55006			0.4375	0.4286	0.4615			0.125	0.0714	0.2308			0.1875	0.2143	0.0769
	14	14	14			0.2071	-1.3714	-0.3143			5.91951	3.98006	3.38003			0.25	0.5714	0.4			0.125	0.1429	0.2667			0.25	0.1429	0.1333
	14	14	14			-0.8786	-0.1357	-0.4786			6.31803	3.61369	3.87599			0.4667	0.3571	0.5625			0.1333	0.2857	0.1875			0.2	0.1429	0.125
	14	16	14			-0.2214	-0.7313	-0.1143			3.55006	3.61369	3.87599			0.2667	0.2857	0.5333			0.2667	0.2143	0.2			0.2	0.1429	0.2
	14	15	13			-0.2643	-0.8667	0.0077			3.84995	3.61369	3.84998			0.2667	0.5	0.2667			0.2	0.1429	0.2			0.1333	0.1429	0.2
	14	14	13			0.1214	-0.4357	-0.3			3.55006	4.18436	3.55006			0.4667	0.5714	0.4667			0.2	0.1429	0.2			0.0667	0.1429	0.1333
	14	13	12			-0.5714	-0.4462	-0.0583			3.74999	3.55006	4.18438			0.4667	0.4286	0.5			0.1333	0.2143	0.2143			0.2667	0.1429	0.0714
	14	13	12			0.4929	-0.7385	0.225			7.35618	9.44787	4.18438			0.4	0.3571	0.4			0.2	0.2143	0.2			0.2	0.1429	0.2
	14	11	12			-0.15	-0.7364	-0.6083			3.49189	3.74999	6.22936			0.4667	0.5714	0.5			0.1333	0.1429	0.1667			0.0667	0.0714	0.25
	14	14	10			-0.4286	-0.6786	0.1			3.74999	8.52286	3.84994			0.2667	0.4615	0.3333			0.0667	0.1538	0.1333			0.2667	0.2308	0.2667
	13	13	16			-1.3	-0.7692	-0.6063			4.10922	5.91651	3.84995			0.4	0.2308	0.4615			0.1333	0.2308	0.1538			0.2	0.2308	0.0769
	11	14	14			0.2909	-0.6857	-0.0714			3.82608	3.74999	3.49189			0.5333	0.4615	0.5263			0.1333	0.1538	0.1053			0.1333	0.2308	0.1579
	17	15	14			-0.4	-0.7067	-0.2			3.55006	3.33853	3.55006			0.2667	0.5385	0.4375			0.2667	0.1538	0.125			0.2	0.1538	0.25
	17	14	13			-0.3294	-0.45	-0.8385			5.40566	3.49189	3.74999			0.5333	0.4615	0.5714			0.2	0.1538	0.1429			0.1333	0.0769	0.1429
	16	17	15			-0.0938	-0.8353	0.6467			4.18436	3.33853	3.55006			0.4	0.5385	0.4286			0.2	0.1538	0.1429			0.2	0.1538	0.2143
	16	15	13			-0.6812	-0.7333	-0.6308			3.74999	6.26879	3.55006			0.4667	0.5385	0.4615			0.1333	0.1538	0.2308			0.2667	0.0769
	16	16	15			0.3438	0.2187	0.3333			3.49189	3.55006	6.23245			0.4667	0.4615	0.4167			0.1333	0.1538	0.1667			0.1333	0.2308	0.1667
	16	14	15			-0.6812	-1.6143	-0.1467			4.10922	3.47281	3.55006			0.6	0.3846	0.5			0.1333	0.2308	0.25			0.1333	0.1538	0.0833
	16	14	14			-0.6375	-0.9286	-0.4286			4.10923	3.47281	3.55006			0.4667	0.3846	0.5			0.2	0.1538	0.2			0.1333	0.2308	0.2
	15	12	13			-0.3533	-0.3917	-0.0615			3.42471	3.84995	3.84995			0.4667	0.3846	0.3333			0.1333	0.1538	0.1333			0.1333	0.1538	0.2667
	15	15	13			0.1867	0.1267	-0.6692			4.42634	3.49189	3.55006			0.5333	0.5385	0.4			0.1333	0.1538	0.2			0.2	0.1538	0.2
	15	15	17			-0.2333	0.26	-0.3882			3.42471	6.15754	3.61369			0.3333	0.4615	0.4286			0.2	0.1538	0.2143			0.2	0.0769	0.1429
	15	15	16			-0.3667	-0.8267	0.0875			3.55006	3.84995	5.91951			0.3333	0.3333	0.3846			0.2667	0.1667	0.1538			0.2	0.1667	0.1538
	15	14	16			0.62	0.3643	0.3			3.55006	4.18436	3.84995			0.4	0.4167	0.4615			0.2	0.1667	0.2308			0.1333	0.25	0.0769
	15	14	15			-0.52	0.2357	-0.0333			4.25811	3.38003	6.15454			0.4	0.4167	0.5			0.2	0.25	0.1875			0.2	0.1667	0.125
	15	13	13			-0.4	0.2846	-0.6231			3.61369	3.84995	4.18438			0.4	0.4167	0.4667			0.2	0.1667	0.2667			0.1333	0.1667	0.1333
	15	13	13			-0.0467	-0.5231	-0.2154			3.84995	3.61369	5.92254			0.4667	0.4167	0.4286			0.1333	0.1667	0.0714			0.1333	0.25	0.2143
	15	13	12			-0.6733	-1.4923	-0.225			3.84995	3.74999	3.61368			0.2667	0.5	0.4286			0.1333	0.1667	0.1429			0.2667	0.0833	0.0714
	15	12	12			-0.4933	0.8583	-0.2417			5.91951	3.84998	6.23245			0.3571	0.3333	0.4286			0.1429	0.3333	0.1429			0.2143	0.0833	0.1429
	15	12	12			-0.7333	0.5583	-0.7833			3.84998	3.84995	4.10922			0.4286	0.25	0.7143			0.2143	0.1667	0.1429			0.2143	0.25	0.0714
	15	11	14			-1.36	-0.4818	-1.1286			3.84995	4.25812	3.84994			0.2857	0.4167	0.4286			0.2143	0.25	0.1429			0.2143	0.0833	0.1429
	14	15	13			0.6929	-0.3	-0.3308			5.91951	3.84998	4.10922			0.3571	0.3636	0.5714			0.1429	0.3636	0.1429			0.2143	0.0909	0.1429
	14	15	15			0.3357	-0.6733	0.5933			3.38003	3.49189	3.38003			0.4286	0.5455	0.4286			0.1429	0.1818	0.1429			0.0714	0.0909	0.1429
	14	14	14			-1.1929	-0.0857	-0.8			4.18438	3.55006	3.92755			0.5	0.4545	0.5			0.2143	0.1818	0.2143			0.1429	0.1818	0.1429
	14	18	15			-0.5214	-0.5389	0.7667			3.74999	3.61369	4.18436			0.2857	0.4	0.4286			0.1429	0.2	0.2143			0.2857	0.2	0.2143
	14	17	13			-0.2429	-0.2294	0.2077			3.49189	4.10922	3.74999			0.4286	0.4	0.5385			0.1429	0.2667	0.1538			0.2857	0.1333	0.0769
	14	16	14			0.4786	0.3937	0.4714			3.49189	3.84994	3.61369			0.5	0.3077	0.4615			0.1429	0.1538	0.2308			0.1429	0.1538	0.0769
	14	16	18			-0.1714	0.0812	0.0333			3.55006	6.15812	4.10922			0.3571	0.3529	0.6923			0.2143	0.1176	0.1538			0.2143	0.1765	0.0769
	14	16	15			0.2786	0.075	-1.0667			3.55006	3.29496	6.31497			0.3571	0.4	0.6923			0.1429	0.2	0.1538			0.2143	0.1333	0.0769
	14	16	14			0.5286	0.125	0.2143			3.55006	3.74999	6.2288			0.3571	0.2941	0.3846			0.1429	0.1176	0.2308			0.2143	0.1765	0.1538
	14	15	13			0.2	0.12	-1			3.49189	4.18436	4.18436			0.4286	0.2941	0.5			0.1429	0.1176	0.1667			0.1429	0.2941	0.1667
	14	15	14			-0.6857	-0.1933	-0.3571			3.49189	3.87599	3.87599			0.5	0.4375	0.5			0.1429	0.125	0.1667			0.2143	0.25	0.1667
	14	15	17			-0.3643	-0.86	-0.4412			3.92755	4.18436	4.18436			0.4286	0.375	0.4			0.1429	0.1875	0.2			0.2143	0.1875	0.2667
	14	15	17			-0.1571	0.5933	0.3			3.49189	5.91951	3.74999			0.5	0.4375	0.4			0.1429	0.125	0.1333			0.1429	0.125	0.2
	14	15	16			-0.7286	0.5	0.0312			3.92755	3.49189	3.84998			0.4286	0.4667	0.3846			0.2143	0.1333	0.2308			0.1429	0.1333	0.0769
	14	15	15			-0.8	0.5467	-0.1333			3.74999	3.55006	5.91951			0.5	0.4667	0.3333			0.1429	0.1333	0.1333			0.1429	0.1333	0.2
	14	15	15			-0.6429	-0.1933	-0.2533			3.87599	3.87599	6.15812			0.5714	0.4667	0.4			0.1429	0.1333	0.1333			0.0714	0.1333	0.2
	13	15	15			-0.7692	0.3533	0.3733			3.61369	3.38003	4.18436			0.4286	0.5	0.4286			0.2143	0.1429	0.1429			0.0714	0.2143	0.2143
	13	15	15			0.0769	-0.2867	-1.32			3.92755	3.33853	6.23245			0.5	0.5	0.5385			0.2143	0.1429	0.0769			0.0714	0.1429	0.2308
	13	14	14			0.1923	0.0429	-0.5143			3.55006	3.61369	4.18438			0.3571	0.4286	0.4118			0.1429	0.1429	0.1176			0.1429	0.1429	0.1765
	13	14	14			-0.1231	-0.3	-0.9143			3.84995	4.18438	3.84995			0.3571	0.5	0.375			0.1429	0.2143	0.1875			0.1429	0.0714	0.25
	13	14	14			-0.4538	-0.2071	-0.5			3.84994	3.55006	6.15812			0.3571	0.3846	0.4375			0.1429	0.1538	0.125			0.2857	0.2308	0.3125
	13	14	14			0.1077	0.2143	0.2786			3.84998	3.74999	8.54983			0.3846	0.3333	0.4			0.3077	0.1667	0.1333			0.1538	0.3333	0.2
	13	14	12			-0.0846	-0.4571	-0.4333			4.18438	3.33853	3.84995			0.4615	0.5	0.4615			0.1538	0.1667	0.1538			0.1538	0.1667	0.0769
	13	13	12			-0.8077	-0.7385	-0.2			3.84998	3.82608	4.25811			0.2308	0.5833	0.4615			0.2308	0.1667	0.1538			0.1538	0.0833	0.2308
	13	13	11			0.2	0.1615	-0.0091			3.55006	3.84994	6.23245			0.4615	0.4167	0.4167			0.1538	0.1667	0.1667			0.1538	0.1667	0.25
	13	13	16			-0.6538	0.2385	-0.1438			3.49189	3.55006	3.87599			0.5385	0.4706	0.5			0.1538	0.1176	0.1667			0.0769	0.1176	0.1667
	13	13	14			-0.8462	0.1154	0.3929			3.49189	3.55006	6.15812			0.5385	0.3529	0.6667			0.1538	0.1176	0.1667			0.1538	0.1765	0.0833
	12	12	14			-0.1083	-0.6917	0.3357			3.55006	4.18438	6.22936			0.3846	0.4118	0.4667			0.1538	0.1765	0.2			0.0769	0.1176	0.2
	12	12	14			0.6083	-0.025	-0.1643			4.18436	3.74999	3.55006			0.4615	0.3529	0.3333			0.1538	0.1765	0.3333			0.0769	0.1176	0.1333
	12	10	14			0.7167	0.04	-0.2571			3.74999	3.74999	3.55006			0.4615	0.3125	0.4			0.1538	0.125	0.1333			0.1538	0.3125	0.2
	12	18	13			-0.1083	-0.5167	-0.3769			3.84995	3.55006	4.10922			0.4615	0.375	0.5714			0.1538	0.125	0.1429			0.1538	0.1875	0.1429
	17	17	13			-0.1824	0.1882	0.2462			3.55006	4.18436	4.10922			0.3333	0.375	0.5			0.1667	0.1875	0.1429			0.25	0.1875	0.1429
	13	16	13			-0.7077	-0.1688	-0.6231			3.87599	3.38003	3.61369			0.5	0.5	0.4286			0.25	0.125	0.1429			0.0833	0.1875	0.1429
	11	15	13			-1.2727	-0.1867	0.0462			3.74999	3.26049	3.38003			0.5	0.5	0.5714			0.1667	0.125	0.2143			0.1667	0.0625	0.1429
	15	15	12			1.08	0.5467	-0.325			3.55006	6.22936	5.4517			0.5	0.4	0.5			0.1667	0.1333	0.3571			0.1667	0.2667	0.0714
	14	15	12			0.45	-0.6067	-0.3			3.55006	8.54984	3.84995			0.4167	0.4667	0.3846			0.1667	0.0667	0.1538			0.1667	0.2	0.0769
	12	15	13			-0.7833	-0.4867	0.7692			3.61369	5.91951	8.54512			0.3333	0.2667	0.5385			0.1667	0.1333	0.1538			0.1667	0.3333	0.1538
	16	15	15			0.25	-0.4333	-0.3467			3.61369	3.74999	3.61369			0.4167	0.4	0.6154			0.25	0.1333	0.1538			0.0833	0.2	0.1538
	14	15	15			-0.1643	-0.4267	-0.5867			3.74999	3.55006	3.55006			0.2727	0.3333	0.4615			0.1818	0.1333	0.2308			0.2727	0.1333	0.0769
	17	15	15			-0.6059	-1.1267	-1.2133			3.55006	5.92254	3.55006			0.4545	0.4	0.4615			0.2727	0.0667	0.2308			0.0909	0.2	0.1538
	14	15	15			-0.1714	0.58	-0.7667			3.38003	3.69898	3.61369			0.5455	0.4667	0.3846			0.1818	0.2	0.1538			0.0909	0.2	0.1538
	14	14	14			-0.7143	0.45	-0.4929			4.25811	3.55006	4.18438			0.3636	0.4	0.5385			0.1818	0.2	0.1538			0.1818	0.1333	0.1538
	16	14	15			-0.2438	0.1857	-1.1067			6.22936	3.74999	6.15812			0.4545	0.4667	0.5385			0.1818	0.1333	0.1538			0.0909	0.2	0.0769
	15	14	14			0.4933	-0.0929	0.1214			6.15812	3.42471	4.25811			0.5455	0.6	0.3846			0.1818	0.1333	0.1538			0.0909	0.1333	0.2308
	15	14	13			-0.2733	-0.4714	0.0692			6.15812	3.74999	3.84994			0.4545	0.4667	0.3333			0.1818	0.1333	0.1667			0.0909	0.2	0.1667
	15	14	12			-0.94	0.3643	0.525			3.84994	6.31497	4.10655			0.2857	0.4667	0.6667				0.1333	0.25			0.4286	0.2	0.0833
	15	14	12			-1.0333	0.0714	0.1333			5.91951	4.18438	3.42471			0.5	0.4	0.5			0.1429	0.1333	0.1667			0.1429	0.2	0.0833
	14	14	18			0.45	0.1357	-1.1944			8.52295	4.36604	6.22936			0.4286	0.4667	0.4			0.1429	0.2	0.1333			0.1429	0.2	0.3333
	16	14	16			-0.1625	-1.1643	0.35			3.55006	3.55006	3.84994			0.3571	0.3333	0.3571			0.1429	0.2	0.1429			0.3571	0.2	0.3571
	16	14	16			-0.625	-0.0714	0.325			3.74999	3.42471	8.54512			0.5	0.3333	0.5455			0.1667	0.2	0.1818			0.0833	0.2667	0.1818
	16	13	15			-0.4625	-0.7	0.06			3.61369	3.49189	10.5264			0.4667	0.4	0.2727			0.2	0.1333	0.1818			0.1333	0.1333	0.2727
	15	13	14			0.76	-0.2846	0.0143			6.31803	3.49189	6.15812			0.5	0.4	0.5714			0.1429	0.0667	0.1429			0.2143	0.2667	0.0714
	15	13	14			-0.7	-0.5538	-0.9143			3.74999	6.15812	3.84998			0.5	0.4	0.4615			0.1429	0.1333	0.2308			0.0714	0.2	0.1538
	14	12	16			0.0143	-1.6167	-0.5875			3.55006	3.55006	3.74999			0.5	0.3333	0.4167			0.1429	0.1333	0.1667			0.1429	0.2667	0.25
	13	12	15			-0.6154	-0.575	-1.0667			3.84995	6.31803	5.91951			0.4286	0.4	0.4			0.1429	0.1333	0.1333			0.2857	0.2667	0.3333
	13	16	15			-0.2692	0.0875	-0.4933			3.55006	4.18438	6.22936			0.5	0.4	0.4286			0.1667	0.2	0.2143			0.25	0.1333	0.2143
	13	13	14			0.2846	-0.3692	0.5857			4.18436	3.55006	6.22636			0.6	0.4	0.4667			0.2	0.2	0.2			0.1	0.2	0.2
	13	13	13			-0.6538	-0.5923	0.3231			3.84995	3.49189	3.84998			0.3571	0.4667	0.5			0.2143	0.1333	0.25			0.1429	0.2	0.1667
	12	15	14			0.1417	0.1933	-0.7143			3.55006	3.55006	6.22636			0.4286	0.4	0.4615			0.1429	0.2	0.2308			0.2857	0.2667	0.1538
	16	17	14			-0.6375	0.0647	-0.6143			3.84998	3.33853	5.36102			0.4	0.5333	0.5			0.2667	0.1333	0.1875			0.1333	0.1333	0.1875
	14	14	14			-0.0143	0.2143	-1.3286			3.84995	3.69898	8.54983			0.4	0.5333	0.4667			0.2	0.1333	0.1333			0.2	0.0667	0.1333
	15	13	12			-0.0733	1.2923	-0.9333			6.22636	3.55006	4.18438			0.6154	0.5333	0.3571			0.2308	0.0667	0.2857			0.0769	0.2	0.1429
	14	18	16			0.2214	-0.1722	-0.1125			3.84994	3.74999	4.18438			0.5385	0.4	0.5			0.1538	0.1333	0.2143			0.1538	0.1333	0.0714
	14	14	14			-0.4786	-0.0143	-0.8929			3.84994	3.61369	6.22636			0.4615	0.4	0.4545			0.1538	0.1333	0.2727			0.2308	0.1333	0.0909
	13	14	18			-0.4692	-0.15	-0.6167			3.38003	3.84995	3.84995			0.5	0.3333	0.4286			0.2143	0.2	0.2143			0.1429	0.2	0.1429
	13	16	16			0.2692	0.3687	-0.75			3.61369	3.55006	6.2288			0.4545	0.4667	0.3571			0.2727	0.1333	0.2143			0.0909	0.1333	0.2143
	12	16	15			0.2083	-0.875	-0.6267			3.84995	6.23245	3.84998			0.4	0.4286	0.3846			0.2	0.1429	0.2308			0.2	0.2857	0.2308
	16	15	15			-0.3438	-0.8333	-0.5267			3.49189	3.74999	5.92254			0.4286	0.4286	0.3333			0.2143	0.1429	0.0667			0.1429	0.1429	0.3333
	15	15	15			-0.6867	-0.74	-0.8533			3.74999	3.55006	3.74999			0.4615	0.3571	0.3077			0.2308	0.1429	0.3077			0.0769	0.2857	0.2308
	15	14	14			-1.1467	-0.1286	-0.2357			3.61369	4.25811	3.84998			0.4615	0.4286	0.3846			0.2308	0.1429	0.2308			0.0769	0.1429	0.2308
	14	12	12			0.0143	-0.1167	0.1083			4.25811	5.91951	3.61369			0.4615	0.4286	0.4167			0.1538	0.1429	0.25			0.1538	0.1429	0.1667
	13	16	10			-0.4615	-0.975	0.14			3.55006	3.74999	3.61369			0.4167	0.5	0.4615			0.1667	0.1429	0.2308			0.25	0.1429	0.1538
	13	16	16			0.2077	0.2688	-0.7875			4.18436	3.84994	3.61369			0.6	0.4286	0.3571			0.1	0.1429	0.2143			0.2	0.1429	0.2857
	15	15	15			-0.8267	-0.3533	-0.1667			6.16118	4.10922	6.22936			0.5385	0.5714	0.4			0.0769	0.1429	0.2			0.2308	0.1429	0.1333
	13	15	15			-0.6154	-0.3533	-0.24			3.84995	3.49189	3.55006			0.3333	0.5	0.4545			0.1333	0.1429	0.1818			0.2667	0.1429
	12	14	16			-0.7167	0.2857	-1.0125			3.92755	3.49189	4.10922			0.5	0.4286	0.3846			0.1429	0.1429	0.1538			0.2143	0.2143	0.1538
	12	13	15			-0.6083	-0.1923	-0.3533			3.84995	3.38003	3.74999			0.3	0.4286	0.2857			0.3	0.1429	0.1429			0.2	0.2143	0.2857
	12	15	15			-0.6083	-0.02	-0.1067			6.15812	4.18113	8.54983			0.4375	0.5	0.5333			0.1875	0.2857	0.1333			0.1875	0.1429	0.1333
	15	14	15			-0.4267	-0.1286	-0.36			3.84995	3.74999	8.5272			0.3333	0.3571	0.4			0.1333	0.1429	0.1333			0.2667	0.2143	0.2667
	15	12	15			0.0267	-0.8583	0.0067			3.84998	3.87599	5.91951			0.4286	0.4286	0.5385			0.2143	0.2143	0.2308			0.0714	0.1429	0.1538
	13	17	15			-0.3077	-0.6059	-0.56			8.50655	3.92755	8.54983			0.3571	0.5	0.5333			0.2143	0.1429	0.1333			0.1429	0.1429	0.1333
	17	15	15			-0.3588	0.84	-0.5333			8.5348	4.18438	3.84994			0.4286	0.3571	0.4			0.2143	0.2143	0.0667			0.1429	0.1429	0.2667
	15	15	13			0.0333	0.1267	0.0308			6.15812	3.74999	3.84995			0.4286	0.4286	0.4667			0.2143	0.1429	0.1333			0.2143	0.2143	0.2
	15	15	12			-0.7	0.42	-1.1917			5.91951	3.49189	3.84995			0.3846	0.4286	0.4			0.1538	0.1429	0.2			0.2308	0.0714	0.1333
	15	14	12			-0.5133	0.2857	-0.7333			3.55006	3.74999	3.74999			0.4615	0.3571	0.4615			0.2308	0.0714	0.1538			0.1538	0.2857	0.2308
	15	14	12			-0.9	-0.8	-0.5083			4.18438	3.33853	8.50651			0.5385	0.5714	0.4286			0.1538	0.1429	0.2143			0.2308	0.1429	0.2143
	15	13	15			-0.24	-0.4923	-0.46			3.74999	4.36602	3.84995			0.4167	0.5	0.4286			0.1667	0.2857	0.2143			0.25	0.0714	0.2143
	15	13	12			0.08	-0.2769	0.025			3.55006	3.49189	5.91651			0.4167	0.4286	0.4375			0.1667	0.0714	0.1875			0.0833	0.2143	0.1875
	14	13	10			0.0929	-0.6769	-0.21			3.55006	3.49189	4.25812			0.5833	0.3571	0.6154			0.25	0.1429	0.2308			0.0833	0.1429	0.0769
	14	12	15			0.0286	0.0083	0.0933			5.92254	4.18438	6.15812			0.3636	0.4286	0.6429			0.1818	0.1429	0.1429			0.1818	0.1429	0.1429
	14	17	15			0.5857	-0.1353	-0.24			3.84995	4.18436	3.84994			0.4615	0.4286	0.5			0.1538	0.1429	0.1429			0.0769	0.0714	0.2143
	14	16	14			0.0357	-0.8938	0.1071			4.4214	3.47281	3.55006			0.5	0.4286	0.5385			0.2222	0.1429	0.1538			0.1111	0.1429	0.2308
	14	16	13			-0.3643	-0.3062	-0.4769			8.5272	3.84995	8.52713			0.375	0.3571	0.5625			0.125	0.1429	0.125			0.25	0.2143	0.125
	13	15	11			-0.0769	0.48	-0.0091			6.15812	4.25812	3.74999			0.5	0.5	0.5333			0.125	0.2143	0.1333			0.125	0.0714	0.1333
	11	15	13			0.0273	0.0533	-0.5385			5.91951	3.61369	6.26937			0.4	0.4286	0.5			0.1333	0.2143	0.1429			0.2667	0.1429	0.1429
	17	14	11			-0.3529	-0.5	-0.9455			4.18436	5.91951	8.54983			0.4667	0.3571	0.5			0.1333	0.1429	0.1111			0.2	0.1429	0.2222
	17	14	15			-0.4412	0.4857	0.0867			3.55006	4.42143	6.16118			0.3571	0.5	0.6			0.2143	0.2857	0.0667			0.1429	0.1429	0.2
	16	13	16			-0.2938	-0.0769	-0.8625			5.91951	3.74999	4.18438			0.3846	0.4615	0.5			0.1538	0.1538	0.1429			0.2308	0.1538	0.2143
	15	12	15			-0.1467	0.5417	-0.76			5.91951	4.18438	4.10922			0.5	0.5385	0.6923			0.1667	0.1538	0.1538			0.1667	0.0769	0.0769
	15	12	14			0.16	0.6	-0.9071			8.5272	3.74999	8.52295			0.4167	0.4615	0.5625			0.1667	0.1538	0.125			0.1667	0.2308	0.1875
	15	12	15			0.6467	-0.45	-0.6533			6.15812	3.49189	3.84995			0.5833	0.4615	0.4			0.1667	0.1538	0.1333			0.0833	0.1538	0.3333
	15	18	13			0.1333	-0.2833	-0.7846			6.26937	3.42471	4.18438			0.625	0.4615	0.4286			0.125	0.1538	0.1429			0.0625	0.2308	0.2857
	15	16	15			-0.3467	-0.2125	-1.1667			3.55006	3.42471	6.26937			0.4667	0.5385	0.6667			0.2	0.1538	0.1667			0.1333	0.1538	0.0833
	14	13	14			-0.4429	-0.6769	-0.2143			3.55006	3.38003	8.53049			0.4	0.4615	0.4545			0.2	0.1538	0.2727			0.2	0.2308	0.2727
	14	12	14			-0.1786	-0.725	-0.4429			3.55006	3.84995	8.52713			0.3333	0.3077	0.5333			0.1333	0.1538	0.1333			0.2667	0.2308	0.2
	14	15	13			0.3643	-0.32	-0.3385			3.55006	6.23245	6.23245			0.4	0.4615	0.4615			0.2	0.1538	0.1538			0.2667	0.2308	0.2308
	13	15	13			0.0692	-0.3067	0.3615			3.84995	3.84994	5.92254			0.5333	0.3333	0.3333			0.1333	0.1667	0.0833			0.2	0.3333	0.25
	17	14	13			-0.3529	0.1429	-0.4154			4.18436	6.26937	3.55006			0.6667	0.4167	0.5			0.1333	0.1667	0.25			0.1333	0.0833	0.0833
	16	12	13			0.1187	-0.9583	-0.5154			6.23245	3.87599	3.84995			0.3571	0.5	0.3077			0.1429	0.25	0.3077			0.2143	0.0833	0.1538
	15	15	16			-0.18	-0.1467	-0.3938			3.84994	3.84995	3.84994			0.3571	0.2	0.3636			0.1429	0.2	0.1818			0.2143	0.2	0.1818
	15	15	15			-0.4867	-0.88	-0.04			6.15812	3.74999	8.54983			0.5	0.4286	0.5			0.2143	0.1429	0.1429			0.1429	0.2143	0.1429
	14	14	15			0.3071	-0.5143	0.3333			4.10922	3.84995	3.74999			0.6429	0.3846	0.4			0.1429	0.1538	0.2			0.0714	0.1538	0.2
	14	14	15			-0.4	-0.5429	-0.5533			3.74999	8.5272	8.5272			0.5714	0.4167	0.4667			0.1429	0.1667	0.1333			0.1429	0.1667	0.2
	12	13	14			-0.2833	0.0692	-0.0643			3.84994	3.87599	6.23245			0.5385	0.5	0.3571			0.1538	0.2143	0.1429			0.1538	0.1429	0.2857
	12	12	14			-0.5917	-0.5	0.1429			3.84995	3.55006	8.54983			0.3077	0.4286	0.4667			0.1538	0.2143	0.1333			0.3077	0.1429	0.1333
	17	12	14			-0.2176	-0.7333	-0.4143			3.84994	6.15812	3.49189			0.3846	0.5385	0.6154			0.1538	0.1538	0.1538			0.2308	0.1538	0.1538
	16	16	14			0.2812	-0.6625	-0.3786			3.84995	3.74999	4.25811			0.4615	0.4375	0.4286			0.1538	0.1875	0.2143			0.2308	0.1875	0.1429
	16	14	13			-0.9875	-0.3714	0.0462			3.49189	3.84994	6.23245			0.5385	0.4545	0.4			0.1538	0.1818	0.1333			0.1538	0.1818	0.2
	16	14	13			-0.8688	-0.3357	-0.2154			4.18436	3.61369	6.15812			0.4615	0.4	0.5			0.1538	0.2	0.1429			0.1538	0.1333	0.1429
	15	13	13			-0.42	-1.1846	-0.6231			3.55006	3.55006	3.38003			0.3846	0.4	0.4667			0.2308	0.2	0.2667			0.3077	0.1333	0.0667
	15	11	15			-1.06	-0.1	0.1867			4.10922	6.15812	3.55006			0.5833	0.4667	0.5714			0.1667	0.1333	0.1429			0.0833	0.1333	0.2143
	15	17	14			-0.76	-0.5	-0.9571			6.22636	4.18438	5.91951			0.5	0.5	0.4286			0.25	0.1429	0.1429			0.1667	0.2857	0.2143
	15	17	13			-0.12	-0.3471	0.4769			3.84995	5.92254	3.74999			0.4167	0.2308	0.5385			0.1667	0.0769	0.1538			0.0833	0.3077	0.1538
	14	16	16			-0.4429	-0.5062	-0.3813			3.49189	5.91951	3.84994			0.6667	0.4167	0.4615			0.1667	0.1667	0.0769			0.0833	0.25	0.3077
	14	16	15			-1.35	-0.3188	-0.5333			3.55006	8.52295	3.61369			0.5	0.4	0.5385			0.25	0.2	0.2308			0.1667	0.1	0.1538
	14	15	15			-0.5143	-0.08	-0.2			4.18436	6.23245	3.84998			0.4545	0.5	0.5385			0.1818	0.1429	0.2308			0.1818	0.1429	0.0769
	13	15	15			-0.4462	-0.7867	-0.7933			3.55006	3.74999	6.22936			0.5714	0.5385	0.4706			0.2143	0.1538	0.1765			0.0714	0.0769	0.1765
	13	15	12			-0.3846	-0.6533	-0.4333			3.84995	5.91951	6.2288			0.3333	0.5714	0.4118			0.1667	0.1429	0.1176			0.25	0.1429	0.2941
	13	11	16			-0.6308	-0.9545	-0.875			3.38003	5.826	3.84995			0.4	0.4	0.375			0.2	0.1333	0.125			0.2	0.2	0.1875
	13	19	15			-0.7077	-0.1158	0.0533			8.54992	8.54983	3.84998			0.5714	0.5714	0.3333			0.0714	0.1429	0.3333			0.2143	0.1429	0.1333
	12	18	15			-0.8917	-0.6222	-0.5667			8.52713	6.27242	3.49189			0.5294	0.6154	0.6			0.1176	0.1538	0.1333			0.1765	0.1538	0.2
	12	16	14			-0.4833	0.1375	-0.6643			3.84994	6.31803	6.23245			0.4615	0.6154	0.3333			0.1538	0.1538	0.1333			0.2308	0.1538	0.2
	14	16	15			-0.1429	0.4312	0.1333			3.84995	3.42471	6.31195			0.3125	0.5	0.6			0.1875	0.2143	0.2			0.3125	0.1429	0.0667
	14	16	15			-0.7429	0.1438	-0.1067			8.54983	3.42471	8.51418			0.4286	0.5333	0.4286			0.2143	0.2	0.2857			0.2143	0.2	0.1429
	11	16	14			-0.7273	-0.425	-0.4786			6.22636	3.74999	3.49189			0.3571	0.4667	0.5714			0.2143	0.1333	0.2143			0.1429	0.2	0.0714
	15	15	14			0.4933	-0.58	0.55			3.84995	5.2898	6.22936			0.2667	0.4	0.4286			0.2667	0.2	0.2143			0.2	0.1333	0.1429
	14	15	16			0.0143	-0.3267	-0.1188			3.74999	3.55006	3.84994			0.6	0.4615	0.4286			0.2	0.1538	0.1429			0.1333	0.1538	0.2143
	10	15	15			0.22	-0.1467	-0.5467			3.84995	5.49051	6.22636			0.4	0.5385	0.4167			0.1333	0.2308	0.25			0.3333	0.1538	0.1667
	18	15	14			-0.8222	-1.3133	0.2357			6.15754	6.22936	6.22936			0.5714	0.375	0.5			0.1429	0.1875	0.1667			0.0714	0.25	0.25
	16	14	12			0.0125	-0.0786	-0.55			5.91951	3.42471	3.84995			0.2727	0.4375	0.4545			0.1818	0.25	0.1818			0.1818	0.125	0.1818
	16	14	12			-0.8938	0.55	0.175			6.31497	5.91951	3.47281			0.4667	0.4667	0.3529			0.2	0.2	0.1765			0.2	0.1333	0.2941
	15	14	16			0.2867	-1.2143	-0.4312			6.15754	5.92254	4.18438			0.4667	0.3333	0.5882			0.1333	0.0667	0.1176			0.1333	0.2667	0.1765
	15	14	13			-0.26	-1.05	-1.2308			6.15812	3.49189	3.61369			0.5	0.5333	0.4375			0.1429	0.1333	0.125			0.1429	0.2	0.25
	14	14	11			-0.3571	-0.75	-1.1727			6.22636	3.49189	6.26879			0.4615	0.4667	0.6875			0.2308	0.2	0.125			0.1538	0.2	0.125
	13	14	14			0.5154	0.0286	-0.2857			8.52713	4.18438	3.84994			0.6	0.4667	0.3333			0.1333	0.2	0.1333			0.1333	0.2	0.2667
	12	13	14			-0.075	-0.9077	-0.4357			8.52716	3.38003	5.2898			0.4	0.6	0.5333			0.1333	0.1333	0.2			0.2	0.0667	0.2
	12	13	12			-0.1167	-0.3	-1.2167			3.87599	3.84995	3.84995			0.6	0.3571	0.4			0.1333	0.2143	0.1333			0.0667	0.2143	0.2
	12	13	15			-0.7583	-0.3692	-0.6333			6.22936	4.18438	3.84995			0.4286	0.4286	0.5333			0.2143	0.1429	0.1333			0.2143	0.2143	0.2
	15	12	15			0.48	-0.3667	-0.14			5.91651	3.42471	8.5272			0.4	0.5	0.4667			0.2	0.2143	0.1333			0.2	0.1429	0.1333
	15	8	15			-0.4267	0.125	-0.0333			3.84995	3.74999	3.84995			0.4667	0.5	0.3571			0.0667	0.1429	0.1429			0.2667	0.2143	0.2857
	14	17	15			-0.7786	-0.0588	-0.5467			3.74999	3.74999	5.91951			0.4667	0.4286	0.3571			0.1333	0.0714	0.2143			0.1333	0.2857	0.2143
	15	17	14			-0.5467	0.3	-1.2571			4.18438	5.45185	8.54983			0.5	0.5	0.5714			0.1429	0.2143	0.1429			0.1429	0.2143	0.2143
	14	16	12			-0.75	-0.1938	-0.725			3.84995	6.34967	3.84994			0.3125	0.5	0.5714			0.125	0.2143	0.1429			0.25	0.1429	0.1429
	15	16	15			0.04	-0.5188	0.1667			3.84994	6.22936	5.92254			0.3571	0.2857	0.2857			0.1429	0.2143	0.0714			0.2143	0.2143	0.2857
	15	16	13			-0.38	-0.0813	-0.5538			8.54976	3.74999	3.74999			0.5	0.4615	0.6429			0.1429	0.2308	0.1429			0.1429	0.1538	0.1429
	14	15	11			-0.1571	-0.5	0.4818			3.84998	3.42471	6.23245			0.4167	0.4615	0.5714			0.25	0.2308	0.1429			0.1667	0.1538	0.1429
	14	15	16			-0.5	-0.1133	-0.125			9.4987	3.55006	3.74999			0.5385	0.4167	0.3846			0.1538	0.25	0.2308			0.0769	0.0833	0.1538
	17	15	15			-0.0294	-0.9133	-0.3867			6.31803	3.55006	3.84995			0.4615	0.4167	0.4615			0.1538	0.1667	0.1538			0.1538	0.1667	0.2308
	16	14	14			-0.9	-0.5429	-1.1714			6.22636	3.38003	8.53472			0.4167	0.5833	0.6154			0.25	0.25	0.2308			0.25	0.0833	0.0769
	15	14	14			-0.38	-0.6786	-0.5143			3.55006	3.61369	3.84995			0.5833	0.4545	0.3846			0.25	0.1818	0.1538			0.0833	0.1818	0.3077
	15	14	15			-0.12	-0.2714	-0.6			4.18436	3.84995	4.18438			0.4286	0.3	0.5385			0.1429	0.3	0.1538			0.2143	0.2	0.2308
	15	14	15			-0.4267	-0.9786	0.1			4.18438	3.84995	8.52295			0.5714	0.5	0.6154			0.2143	0.2	0.1538			0.0714	0.1	0.1538
	14	13	14			-0.1786	0.2385	0.7571			6.15812	3.84995	4.10922			0.5	0.6	0.6923			0.1429	0.2	0.1538			0.1429	0.1333	0.0769
	14	12	16			-0.1786	0.7833	-0.6063			9.29802	3.84994	3.84994			0.4444	0.5385	0.4167			0.1667	0.1538	0.1667			0.2222	0.1538	0.25
	14	12	15			-0.3071	-0.4667	-0.2			3.84995	3.74999	3.55006			0.2667	0.5	0.5			0.1333	0.1429	0.25			0.2667	0.0714	0.0833
	14	12	11			-0.9286	-0.9917	0.1182			8.52295	5.91951	4.37037			0.4	0.3846	0.5833			0.1333	0.1538	0.1667			0.2667	0.2308	0.1667
	16	12	15			0.2312	0.1083	-0.5267			6.15812	5.91951	7.35552			0.5	0.5385	0.4545			0.1875	0.1538	0.3636			0.1875	0.1538	0.1818
	15	11	14			0.16	0.4182	0.0571			5.92254	3.84994	6.2288			0.4615	0.5	0.4545			0.0769	0.1667	0.1818			0.3077	0.1667	0.2727
	15	14	11			-0.7067	-0.1714	0.1091			4.37037	6.15812	6.31195			0.6154	0.4444	0.5			0.1538	0.1111	0.25			0.1538	0.2778	0.0833
	15	15	15			0.24	-0.3533	0.1933			6.23245	3.55006	5.91951			0.4	0.4375	0.4118			0.2	0.125	0.1176			0.2	0.25	0.1765
	15	15	13			-0.4	0.1267	0.1231			3.84994	3.42471	5.91951			0.3333	0.5	0.375			0.1667	0.1875	0.125			0.3333	0.125	0.1875
	13	15	16			0.1	-0.1467	-0.6562			6.15812	6.15812	8.5272			0.5714	0.5333	0.3333			0.1429	0.1333	0.1333			0.0714	0.0667	0.2667
	15	13	16			0.3067	-0.3077	-0.325			6.15514	3.55006	4.18438			0.4286	0.4667	0.5			0.2143	0.1333	0.25			0.1429	0.2	0.1667
	14	13	15			-0.2786	-0.8154	-0.2267			5.91951	3.84998	6.15216			0.4615	0.3571	0.4375			0.2308	0.2143	0.25			0.2308	0.0714	0.125
	14	14	15			-0.55	-0.6143	-0.48			6.23245	3.55006	6.23245			0.4667	0.5	0.4			0.1333	0.2143	0.1333			0.1333	0.1429	0.1333
	13	13	14			-0.1154	0.5154	-0.5214			3.55006	4.18114	3.61369			0.5	0.5	0.5455			0.2143	0.2143	0.1818			0.2143	0.1429	0.1818
	11	13	15			0.4364	-0.1231	-0.9067			4.10922	3.55006	5.91355			0.625	0.4286	0.5			0.125	0.2143	0.25			0.125	0.1429	0.125
	11	12	13			-0.1818	0.1	-0.5154			8.5272	3.49189	5.91951			0.5333	0.5714	0.4			0.1333	0.1429	0.1333			0.2	0.0714	0.2
	11	13	14			0.4364	-0.1538	-0.4071			5.92254	3.84994	5.91951			0.4667	0.3846	0.4			0.0667	0.1538	0.1333			0.3333	0.3846	0.2
	17	14	15			-0.0059	-0.3071	-0.1333			3.84994	4.18438	5.91951			0.3333	0.5385	0.5333			0.1333	0.1538	0.1333			0.2667	0.1538	0.1333
	15	13	14			-0.4533	-1.0462	-0.2071			3.84994	4.25812	3.84995			0.4	0.6154	0.3571			0.1333	0.2308	0.2857			0.2667	0.0769	0.1429
	15	14	13			-1.5733	-0.6286	-0.6692			3.55006	3.84994	5.92254			0.6429	0.4167	0.4286			0.1429	0.1667	0.0714			0.1429	0.1667	0.2857
	15	15	15			-0.5933	0.02	0.4			3.74999	3.55006	8.5272			0.5	0.5	0.5			0.1429	0.25	0.1429			0.1429	0.1667	0.1429
	15	14	16			-1.0133	-0.4286	-0.8312			3.74999	6.31497	4.18436			0.4615	0.5833	0.4286			0.0769	0.25	0.2857			0.3077	0.0833	0.2143
	14	13	15			0.6	0.6385	-0.5733			8.54983	6.15812	3.84995			0.4615	0.5833	0.3846			0.2308	0.1667	0.3077			0.1538	0.0833	0.1538
	14	17	15			-0.0429	0.3353	0.1867			6.23245	5.92254	3.84994			0.4118	0.4615	0.3846			0.1176	0.0769	0.1538			0.2353	0.2308	0.1538
	14	16	12			-0.0214	0.1625	-0.35			3.74999	8.52295	3.74999			0.5625	0.6429	0.5			0.125	0.1429	0.125			0.0625	0.1429	0.1875
	14	15	13			-0.2857	-0.6733	-0.0308			10.4374	3.84995	6.23245			0.5333	0.4286	0.4286			0.1333	0.2143	0.1429			0.2	0.1429	0.2857
	12	14	14			0.125	0.1143	-0.5786			5.91951	7.35552	3.55006			0.6	0.3333	0.4286			0.1333	0.2667	0.1429			0.2	0.2	0.2857
	12	14	10			-0.3	-1.0143	0.35			5.91951	8.5272	3.74999			0.4667	0.4615	0.5714			0.1333	0.1538	0.1429			0.1333	0.1538	0.1429
	12	14	15			-0.1417	0.1714	0.1667			3.74999	3.49189	6.35572			0.5714	0.4375	0.5714			0.1429	0.125	0.1429			0.1429	0.125	0.2143
	8	14	14			-0.3375	-0.3429	-0.6071			6.15754	5.91951	3.74999			0.5	0.4286	0.5385			0.2143	0.1429	0.1538			0.2143	0.2143	0.2308
	14	12	12			-0.2286	0.9417	-0.6333			6.15812	8.52295	6.23245			0.5	0.5385	0.4615			0.1429	0.1538	0.1538			0.2143	0.1538	0.2308
	14	14	15			0.3143	-0.65	-0.4667			6.15812	6.22636	8.5272			0.5	0.6154	0.5385			0.1429	0.2308	0.1538			0.2143	0.0769	0.1538
	13	13	15			-0.1077	-0.3846	-0.66			8.50651	5.91951	6.2288			0.4706	0.4615	0.4615			0.1765	0.1538	0.1538			0.1765	0.2308	0.2308
	16	13	14			-1.0562	-0.4	0.0071			3.84995	6.31497	8.54984			0.3125	0.5385	0.4167			0.1875	0.1538	0.0833			0.1875	0.1538	0.3333
	16	12	15			0.125	-0.125	0.2733			6.15514	6.22936	5.91951			0.5	0.4286	0.5			0.1875	0.1429	0.1667			0.1875	0.2143	0.1667
	15	17	15			0.16	-0.2294	-0.0933			9.49998	3.61369	3.84995			0.5625	0.3571	0.4444			0.125	0.2857	0.1667			0.1875	0.2143	0.2222
	14	16	14			0.1	0.0875	-0.4071			6.23245	3.49189	3.84995			0.4	0.5714	0.4706			0.2	0.2143	0.1765			0.2	0.0714	0.2353
	15	15	13			-0.2267	-0.0667	-1.4692			6.23245	6.22636	6.23245			0.4	0.4286	0.3125			0.1333	0.2143	0.125			0.2667	0.1429	0.25
	14	15	15			-0.3	-0.4067	-1.1867			8.22118	6.23245	5.91951			0.4	0.4	0.375			0.0667	0.1333	0.1875			0.2667	0.2667	0.125
	14	14	16			0.0286	0.15	-0.4688			3.74999	6.15812	6.31803			0.5333	0.5714	0.5			0.1333	0.1429	0.125			0.1333	0.1429	0.1875
	13	14	14			-0.1231	-0.1571	-0.3214			6.23245	3.87599	3.84995			0.5333	0.7143	0.375			0.1333	0.1429	0.125			0.2667	0.0714	0.25
	12	13	13			-0.7083	-1.2615	-0.0615			6.31497	6.22636	3.84995			0.6	0.4615	0.5			0.2	0.2308	0.125			0.1333	0.1538	0.25
	13	13	15			-0.1077	-0.5231	-0.3067			4.10922	3.74999	6.22936			0.6429	0.5	0.375			0.2143	0.1429	0.1875			0.0714	0.1429	0.25
	16	12	14			-0.025	-0.35	0.3357			3.55006	6.15812	3.84998			0.5	0.4286	0.4667			0.2143	0.1429	0.2667			0.1429	0.1429	0.0667
	15	12	13			-0.8333	-0.1417	0.2			4.10922	6.26879	5.91951			0.5	0.6429	0.4667			0.1429	0.1429	0.1333			0.1429	0.1429	0.2
	11	11	11			0.2182	0.8273	0.6818			3.55006	4.10922	3.84994			0.3846	0.7143	0.5333			0.3077	0.1429	0.1333			0.1538	0.0714	0.1333
	14	11	17			-0.6	-0.7273	-0.0176			5.49051	8.52716	3.84995			0.5385	0.4286	0.3333			0.3077	0.2143	0.2			0.1538	0.2857	0.2
	14	11	16			-0.5	0.6545	0.1062			8.5272	6.15812	3.84995			0.5385	0.5	0.3571			0.1538	0.125	0.2143			0.2308	0.125	0.2143
	14	17	15			-0.7929	0.1294	0.1667			6.2288	3.74999	5.91951			0.3846	0.5333	0.3571			0.1538	0.2	0.1429			0.2308	0.0667	0.2857
	15	15	14			-0.42	0.0867	-1.1071			7.35547	3.74999	3.84994			0.5714	0.5	0.4286			0.2143	0.1429	0.1429			0.0714	0.0714	0.3571
	15	15	16			0.3533	-0.08	-0.4688			8.52716	3.74999	5.91951			0.5455	0.5385	0.5			0.1818	0.1538	0.1429			0.0909	0.0769	0.2143
	13	14	13			-0.9	-0.3	0.0308			3.61369	6.15812	3.84995			0.4	0.5385	0.4286			0.2	0.1538	0.1429			0.2	0.0769	0.2143
	12	14	16			-1.2167	-0.7	-0.625			5.36102	5.36095	8.5272			0.3077	0.5455	0.4286			0.2308	0.3636	0.1429			0.1538	0.0909	0.2143
	16	14	15			-0.0188	0.0429	-0.3467			3.84998	3.84995	8.52286			0.4286	0.3571	0.6429			0.2143	0.2143	0.1429			0.2143	0.2857	0.0714
	16	14	14			-0.3813	-0.1357	-0.65			5.91951	3.84994	3.55006			0.3125	0.2667	0.4615			0.125	0.1333	0.2308			0.1875	0.2667	0.1538
	14	13	12			-0.4286	0.0077	1.0833			6.22936	3.84994	8.54983			0.5385	0.4615	0.4615			0.1538	0.1538	0.1538			0.1538	0.2308	0.2308
	14	13	13			-0.8786	-0.1385	-0.7			4.18439	9.49998	3.61369			0.4615	0.5	0.6154			0.1538	0.1429	0.1538			0.2308	0.1429	0.1538
	14	12	15			-0.8286	0.05	0.0933			8.50651	6.22636	7.35618			0.5	0.4615	0.5385			0.1875	0.2308	0.2308			0.125	0.0769	0.1538
	13	11	14			-0.3308	0.3727	-0.2			8.5272	5.45185	6.23245			0.4375	0.6154	0.3846			0.125	0.2308	0.1538			0.125	0.1538	0.2308
	12	15	13			-0.5083	0.7067	0.1769			4.18438	3.92755	4.5446			0.4286	0.6429	0.6154			0.2857	0.1429	0.1538			0.1429	0.1429	0.1538
	12	15	13			-0.8417	-0.8267	-0.4385			8.52713	3.74999	6.22936			0.5714	0.4	0.4615			0.1429	0.1333	0.1538			0.1429	0.1333	0.2308
	15	14	15			0.36	-0.5286	-0.6733			6.26937	3.92755	3.84995			0.6923	0.4286	0.3333			0.1538	0.1429	0.1667			0.0769	0.1429	0.1667
	15	15	13			-0.7067	-0.6067	0.5			5.91951	3.74999	3.55006			0.375	0.4706	0.5833			0.1875	0.1176	0.1667			0.1875	0.1176	0.1667
	15	15	12			-0.32	-1.0133	-0.0833			7.35552	4.18436	6.23245			0.4	0.4667	0.4167			0.2	0.2667	0.25			0.2	0.1333	0.1667
	14	16	12			-0.9357	-0.3062	-0.4833			3.74999	6.23245	8.50254			0.5333	0.4375	0.5833			0.1333	0.125	0.25			0.1333	0.25	0.0833
	13	15	15			-1.1538	-0.9533	-0.4133			3.84994	8.52713	3.55006			0.4	0.6429	0.4545			0.1333	0.1429	0.1818			0.2667	0.0714	0.0909
	16	15	12			-0.3188	-1.0333	-0.525			3.74999	6.26937	3.84995			0.5333	0.5	0.3636			0.1333	0.1429	0.2727			0.1333	0.0714	0.2727
	16	14	13			-0.2938	0.5929	-0.5538			6.22936	3.55006	8.54518			0.3846	0.4167	0.3			0.2308	0.3333	0.2			0.1538	0.1667	0.3
	15	13	14			-0.3133	0.2846	-0.8286			6.15812	4.25811	5.92254			0.4375	0.5	0.4444			0.1875	0.125	0.3333			0.1875	0.25	0.1111
	14	13	13			-1.1	0.2692	-0.4308			6.31497	6.23245	3.55006			0.5	0.4286	0.3846			0.2143	0.1429	0.1538			0.0714	0.2143	0.3077
	14	16	14			0.2786	-0.5875	-1.2071			3.74999	6.15812	3.84994			0.5	0.5333	0.4667			0.1429	0.1333	0.1333			0.0714	0.1333	0.2
	13	15	15			-0.2462	-0.4867	0.7067			6.22936	3.74999	4.25811			0.5	0.6	0.5			0.1429	0.2	0.2143			0.1429	0.0667	0.2143
	16	15	11			-0.3125	0.3533	0.1909			3.84994	3.74999	3.74999			0.5	0.4667	0.3846			0.1667	0.1333	0.1538			0.25	0.2667	0.2308
	13	16	16			-0.1923	-0.475	-0.075			3.74999	3.55006	6.22936			0.6667	0.4	0.3846			0.1667	0.1333	0.1538			0.0833	0.1333	0.1538
	13	12	12			-0.9	-0.3	0.2417			3.84995	11.0598	4.37037			0.4667	0.5714	0.6667			0.1333	0.1429	0.1333			0.2	0.1429	0.0667
	13	14	16			-0.7231	-0.5786	-0.1813			7.35905	3.55006	6.31497			0.5	0.4545	0.5833			0.1429	0.1818	0.1667			0.2857	0.1818	0.0833
	15	15	13			-1.02	-0.3	-1.0462			6.22936	6.22936	4.18438			0.5	0.5	0.4615			0.1429	0.1429	0.3077			0.1429	0.2143	0.0769
	16	16	12			-0.8188	0.0187	-1.35			4.25811	11.0599	8.52716			0.4615	0.5333	0.4615			0.1538	0.2	0.3077			0.2308	0.1333	0.1538
	15	16	13			-0.1533	-0.35	-1			3.74999	6.22936	7.3594			0.3636	0.4	0.3846			0.1818	0.1333	0.3846			0.2727	0.1333	0.1538
	15	15	13			-0.0267	0.4867	0.2923			6.23245	4.10922	8.54512			0.4545	0.5714	0.3571			0.1818	0.1429	0.2143			0.1818	0.1429	0.2143
	15	17	13			0.1867	-0.1235	-0.3308			3.84994	5.92254	4.18436			0.1818	0.4118	0.4167			0.2727	0.0588	0.25			0.2727	0.2941	0.0833
	15	15	14			0.24	0.0067	0.2643			3.74999	3.55006	3.84998			0.375	0.5	0.3571			0.1875	0.1875	0.3571			0.25	0.25	0.1429
	14	14	13			-0.4	-0.1286	0.6154			3.84995	8.5272	3.61369			0.4375	0.4667	0.3333			0.125	0.1333	0.2			0.1875	0.1333	0.2667
	14	12	14			-0.5714	-0.6583	-0.6357			6.23245	6.23245	6.22936			0.4	0.5	0.2857			0.2	0.2143	0.2143			0.2	0.1429	0.2857
	13	15	17			0.3692	-0.28	-0.0235			3.74999	6.31195	8.54992			0.4667	0.5	0.3077			0.1333	0.2857	0.1538			0.1333	0.0714	0.2308
	13	15	14			-0.5538	-0.28	-0.2357			8.52286	6.23245	8.54512			0.5333	0.5	0.4667			0.1333	0.1429	0.1333			0.1333	0.2857	0.1333
	16	14	15			-0.8938	-0.6929	-0.8467			3.74999	3.49189	3.74999			0.5333	0.5	0.4667			0.1333	0.1429	0.1333			0.1333	0.1429	0.1333
	16	14	14			-0.5562	-0.6786	-0.6857			5.2898	3.84994	3.84994			0.5333	0.3333	0.375			0.2	0.25	0.125			0.1333	0.25	0.25
	14	14	13			-0.6857	-0.6786	0.2231			5.91951	3.84995	8.5272			0.5	0.3333	0.6			0.2143	0.3333	0.1333			0.0714	0.1333	0.2
	14	13	15			-0.9857	0.4846	-1.14			3.74999	3.84995	3.49189			0.5714	0.4667	0.5			0.1429	0.1333	0.2143			0.2143	0.2667	0.0714
	13	12	13			-1.4923	-0.8	0.7231			3.84994	6.15812	3.74999			0.4286	0.6	0.4286			0.1429	0.1333	0.1429			0.2143	0.1333	0.2143
	12	10	14			0.2167	0.7	-0.9357			5.91951	6.22936	3.47281			0.3571	0.4286	0.5			0.1429	0.2143	0.1429			0.2143	0.2143	0.2857
	12	16	12			-0.9417	-0.0563	-0.1083			8.52716	6.23245	3.74999			0.5	0.4286	0.4667			0.1429	0.1429	0.1333			0.1429	0.2143	0.2
	16	15	17			-0.225	-0.3733	-0.0235			3.74999	3.84995	5.91951			0.5	0.4615	0.2857			0.1429	0.1538	0.1429			0.2143	0.2308	0.2143
	16	15	14			0.3625	-0.8067	0.0643			8.55739	8.50655	4.18438			0.5	0.3846	0.6429			0.2143	0.2308	0.1429			0.2143	0.1538	0.0714
	14	15	13			-0.5643	-0.9733	-0.3615			8.5272	6.26937	3.84995			0.5	0.6923	0.5333			0.1429	0.1538	0.2			0.2143	0.0769	0.1333
	18	15	14			-0.1556	-0.8667	0.1429			3.49189	3.84994	6.23245			0.5	0.3333	0.3846			0.2143	0.25	0.1538			0.1429	0.1667	0.3077
	17	14	11			-0.1765	-0.6929	-0.4			6.23245	5.91951	3.84995			0.4286	0.3333	0.2667			0.1429	0.1667	0.2			0.2857	0.25	0.2667
	14	14	14			0.3071	-0.3214	-0.3			8.50655	3.84998	3.74999			0.4286	0.3636	0.375			0.2143	0.3636	0.125			0.2143	0.0909	0.125
	13	14	14			0.6462	-0.8714	-0.3786			6.15812	6.15812	3.74999			0.5714	0.5	0.5333			0.1429	0.1429	0.2			0.1429	0.0714	0.1333
	13	13	16			0.2846	0.1231	0.175			4.18439	3.84995	6.31497			0.5385	0.3571	0.6			0.3077	0.2143	0.1333			0.0769	0.2143	0.1333
	12	15	14			0.05	-0.8067	-0.4571			3.84994	3.84995	3.55006			0.4545	0.4	0.4			0.1818	0.2	0.2			0.1818	0.1	0.2
	14	15	15			0.0571	-0.38	-0.3			5.36102	3.84998	3.84995			0.5385	0.4615	0.2667			0.3077	0.2308	0.2			0.1538	0.1538	0.2
	15	15	15			-0.22	-0.3	-0.6467			3.84995	4.18438	3.55006			0.3077	0.5833	0.6			0.1538	0.25	0.1333			0.3077	0.0833	0.2
	14	14	13			-0.1857	0.3071	0.0692			5.91951	3.84995	3.74999			0.4375	0.5	0.4667			0.1875	0.2143	0.2			0.125	0.2143	0.0667
	14	14	14			-0.3714	-0.5214	-1.55			5.91951	5.91951	3.84995			0.4118	0.375	0.4286			0.1176	0.125	0.1429			0.2353	0.1875	0.1429
	14	17	15			0.1357	-0.4882	-0.6			3.55006	6.23245	3.38003			0.4667	0.4375	0.6923			0.3333	0.125	0.1538			0.1333	0.25	0.0769
	15	15	12			-0.18	-0.7467	-0.85			8.51864	8.5272	6.22936			0.7333	0.4375	0.4			0.1333	0.125	0.2			0.0667	0.125	0.3
	15	13				-0.9333	-0.5385				7.35905	6.31195				0.5333	0.5				0.1333	0.2143				0.2	0.1429
	13	14				-0.0308	-0.65				6.26638	3.74999				0.5333	0.5714				0.2	0.1429				0.1333	0.1429
	13	15				-0.9154	0.12				4.18438	3.55006				0.4286	0.4615				0.1429	0.2308				0.3571	0.1538
	12	13				0.1	-0.4692				5.91951	8.52295				0.5	0.3846				0.1429	0.1538				0.2143	0.1538
	12	13				-0.1833	-0.7923				6.23245	6.22936				0.5	0.5				0.1429	0.25				0.2143	0.1667
	10	14				0.87	0.4429				4.18436	5.92254				0.4286	0.4667				0.1429	0.0667				0.2143	0.2
	15	15				-0.6533	-0.68				8.5272	6.22936				0.4167	0.4667				0.1667	0.1333				0.25	0.1333
	14	14				-0.1571	-1.1643				5.91951	4.18436				0.5	0.5				0.1667	0.1429				0.1667	0.2143
	15	16				-0.12	0.025				6.22936	6.31195				0.5	0.5333				0.1667	0.2				0.1667	0.0667
	15	16				-0.3	0.2187				3.84995	5.91951				0.5	0.4667				0.25	0.1333				0.125	0.1333
	14	16				-0.15	-0.5562				6.22936	4.25813				0.5294	0.4167				0.1176	0.25				0.2353	0.1667
	16	14				0.225	-0.9429				6.15812	6.22936				0.5294	0.5455				0.1176	0.1818				0.1765	0.0909
	13	15				-0.4154	-1.2933				4.18436	6.23245				0.5	0.4118				0.1875	0.1176				0.1875	0.1765
	13	15				-0.0308	-0.2467				3.92755	5.91951				0.5	0.4375				0.1875	0.125				0.1875	0.1875
	13	12				-0.4385	-0.0917				8.52295	4.25811				0.4375	0.5333				0.125	0.1333				0.25	0.2
	13	11				0.6	-0.7727				3.38003	5.92254				0.4375	0.4667				0.25	0.0667				0.125	0.2
	13	14				-0.0154	-0.4071				9.4987	3.74999				0.5	0.5				0.125	0.1429				0.1875	0.2143
	15	13				0.2467	-0.4462				8.54976	6.23245				0.5333	0.5				0.2	0.2143				0.2	0.1429
	16	16				-0.2	-0.475				6.22936	3.92755				0.4	0.5385				0.2667	0.3077				0.2	0.0769
	15	15				-0.6	-0.2733				6.22636	3.84998				0.4	0.3846				0.2667	0.3077				0.1333	0.0769
	13	14				0.1538	-0.0429				5.91951	8.5272				0.4667	0.4167				0.1333	0.1667				0.2667	0.1667
	16	14				-0.4812	-0.2571				3.84995	3.74999				0.3333	0.4167				0.1333	0.1667				0.3333	0.1667
	15	16				-0.0667	-0.4562				4.10922	6.23245				0.5333	0.3636				0.1333	0.2727				0.2	0.2727
	15	14				0.0133	-0.3071				4.18438	3.84998				0.5333	0.4545				0.2	0.2727				0.2	0.0909
	14	13				0.0929	-0.9				8.54983	5.91951				0.4667	0.3636				0.1333	0.1818				0.2667	0.2727
	14	17				-0.5143	0.1412				3.49189	6.40536				0.6	0.5				0.1333	0.1111				0.0667	0.2778
	13	16				-0.2846	0.2625				3.74999	6.23245				0.4667	0.4118				0.2667	0.1176				0.1333	0.1765
	10	15				-0.13	0.2067				4.18436	6.23245				0.5333	0.5				0.1333	0.125				0.2	0.25
	16	14				0.1	-1.1429				5.45171	7.36011				0.6667	0.5625				0.2667	0.1875				0.0667	0.1875
	16	14				0.3437	-0.2143				3.84995	5.91951				0.2857	0.375				0.1429	0.1875				0.2857	0.1875
	15	16				-0.2667	-0.6688				3.84998	4.18435				0.3571	0.4375				0.2857	0.1875				0.2143	0.25
	17	14				-0.3588	-0.7571				6.31497	3.55006				0.6429	0.4667				0.2143	0.2				0.0714	0.2
	16	14				-1.0375	-0.6786				3.55006	3.74999				0.5	0.4667				0.3571	0.1333				0.0714	0.2
	15	14				-0.5933	-0.1				3.55006	3.92755				0.5714	0.5333				0.2143	0.2667				0.0714	0.1333
	15	14				-1.0667	-0.5357				3.74999	3.84995				0.3571	0.4667				0.1429	0.1333				0.2143	0.3333
	12	13				-0.6167	0.0462				3.74999	3.61369				0.5714	0.4				0.1429	0.2				0.1429	0.2667
	15	13				0.2867	0.4231				6.23245	6.22936				0.5	0.4				0.1429	0.1333				0.2857	0.3333
	12	12				-0.4167	-0.9083				3.84994	4.18438				0.3571	0.6				0.1429	0.1333				0.2143	0.2
	15	9				-0.3	0.2				4.18438	3.84994				0.4286	0.4				0.2143	0.1333				0.2143	0.2667
	15	16				0.0667	-0.55				9.5012	8.5272				0.5714	0.4667				0.2143	0.1333				0.1429	0.2
	13	12				-1.0538	-1.2667				8.50651	3.55006				0.4286	0.5				0.2143	0.2143				0.2143	0.2143
	13	13				0.2308	0.3077				8.5272	3.74999				0.4286	0.5				0.2143	0.0714				0.1429	0.2857
	15	16				-0.5733	-0.2625				3.74999	5.91951				0.6429	0.4286				0.1429	0.1429				0.1429	0.1429
	15	15				0.2333	-0.4267				4.10922	5.91951				0.5714	0.4286				0.1429	0.1429				0.1429	0.2143
	14	13				-0.6571	-0.1692				6.15812	3.84995				0.5	0.4286				0.1429	0.2143				0.1429	0.0714
	14	15				-1.2143	0.5733				6.22636	10.4374				0.4615	0.4615				0.2308	0.1538				0.0769	0.1538
	14	15				-0.5429	-1.08				5.92254	3.55006				0.4615	0.3846				0.1538	0.2308				0.2308	0.2308
	13	14				0.2615	0.1786				6.23245	3.84998				0.4615	0.3846				0.1538	0.2308				0.2308	0.2308
	14	16				0.1429	0.05				3.84995	4.2581				0.5385	0.3846				0.1538	0.2308				0.1538	0.3077
	15	15				-0.5067	-0.2333				8.50655	3.55006				0.4615	0.4167				0.2308	0.25				0.1538	0.0833
	14	14				-0.65	-0.6214				6.22936	3.84994				0.4615	0.5				0.1538	0.1667				0.3077	0.1667
	14	16				-0.0071	-0.275				6.23245	5.91951				0.6154	0.5				0.1538	0.2				0.1538	0.2
	14	14				0.1714	-0.1714				4.10922	5.91951				0.6154	0.5				0.1538	0.1667				0.1538	0.1667
	12	16				1.1167	-0.7625				8.5348	3.74999				0.3846	0.5				0.2308	0.2143				0.2308	0.0714
	13	15				-0.2308	-0.5667				3.74999	6.22936				0.5385	0.4118				0.1538	0.1176				0.0769	0.2353
	14	15				-1.0429	-0.3667				6.22636	8.52295				0.3846	0.4667				0.2308	0.1333				0.0769	0.2
	9	15				-0.4111	-0.2667				3.49189	6.23245				0.5833	0.4667				0.1667	0.1333				0.1667	0.2
	14	14				0.4143	-0.0714				4.18439	3.92755				0.4167	0.5714				0.1667	0.1429				0.25	0.1429
	14	13				-0.6214	-0.2615				3.84995	6.15812				0.4167	0.5714				0.1667	0.2143				0.3333	0.0714
	12	15				0.075	-0.6533				3.74999	4.18436				0.5833	0.5				0.1667	0.1429				0.1667	0.2857
	10	15				-1.08	-0.6333				3.84995	5.91951				0.3125	0.5				0.125	0.1429				0.25	0.1429
	15	14				-0.1067	-0.2643				4.18438	6.23245				0.5	0.5385				0.1429	0.1538				0.1429	0.2308
	15	10				-0.5867	-0.39				8.5272	5.91951				0.4286	0.4615				0.1429	0.2308				0.2143	0.1538
	15	14				-0.3667	-0.45				5.45179	3.84995				0.4118	0.5				0.2353	0.1667				0.2353	0.25
	14	13				0.6929	-0.8462				6.22936	3.74999				0.5385	0.4545				0.2308	0.1818				0.0769	0.2727
	15	14				0.42	-0.45				4.25811	3.69898				0.4545	0.4444				0.2727	0.1667				0.0909	0.2222
	14	12				-1.1429	-0.3				3.84994	5.91951				0.2667	0.4118				0.2	0.1176				0.2667	0.2353
	11	15				-1.2182	0.2933				3.84994	6.23245				0.2857	0.5				0.2143	0.125				0.2857	0.1875
	13	11				-0.5692	0.2091				3.49189	3.74999				0.5833	0.4				0.1667	0.2				0.0833	0.1333
	13	12				0.0769	0.2833				6.23245	3.84995				0.3571	0.4				0.2143	0.2				0.2143	0.2667
	10	14				0.34	-0.2214				8.54983	4.25811				0.4615	0.4				0.2308	0.2				0.1538	0.1333
	15	12				-0.2733	-0.8083				5.91951	3.55006				0.375	0.4667				0.125	0.2				0.25	0.1333
	14	15				-0.1714	0.5933				5.91951	5.91951				0.3077	0.4667				0.1538	0.1333				0.1538	0.1333
	14	14				-0.6357	-0.8643				3.61369	3.55006				0.4286	0.4667				0.2857	0.1333				0.2143	0.1333
	13	10				-0.5538	0.05				5.91951	4.18438				0.4	0.5333				0.2	0.2				0.2	0.0667
	12	17				-0.5083	-0.1059				3.55006	5.91951				0.5294	0.3333				0.1176	0.1333				0.1765	0.2667
	13	14				-1.1538	0.2286				3.74999	6.22936				0.4286	0.3571				0.1429	0.1429				0.1429	0.3571
	13	14				0.1538	-1.2				3.84998	3.84995				0.5	0.4286				0.2143	0.1429				0.0714	0.2143
	17	13				-0.1	0.4077				6.15812	8.54983				0.5625	0.5				0.125	0.1429				0.0625	0.2143
	15	14				-0.7	-0.8429				3.61369	3.84998				0.375	0.4286				0.1875	0.2143				0.25	0.1429
	16	14				0.3687	-0.35				3.55006	3.84995				0.4375	0.3571				0.1875	0.1429				0.1875	0.2857
	15	13				-0.2133	-0.7231				3.84995	6.22936				0.2667	0.4286				0.2	0.1429				0.2667	0.2857
	16	13				-0.1438	0.2231				4.18436	5.91951				0.4	0.4286				0.2	0.1429				0.2	0.2143
	15	15				0.2133	-0.8267				4.18436	4.10922				0.5333	0.5714				0.1333	0.2143				0.1333	0.0714
	12	15				0.05	0.26				3.55006	6.15812				0.6	0.4286				0.1333	0.1429				0.0667	0.2857
	14	15				-0.3357	-0.18				5.91951	6.15812				0.3571	0.5385				0.1429	0.2308				0.2857	0.0769
		14					-1.1643					5.91951					0.4615					0.1538					0.1538
		11					0.4182					3.84995					0.3077					0.1538					0.0769
		15					-0.0667					8.52706					0.5833					0.1667					0.0833
		12					-1.075					8.5272					0.4167					0.1667					0.1667
		14					-0.0071					3.84995					0.5625					0.125					0.1875
		16					-0.6562					5.91951					0.6154					0.1538					0.1538
		15					-0.0133					5.92254					0.3333					0.0667					0.2
		15					-0.2133					6.15812					0.4615					0.1538					0.1538
		14					-1.1					3.74999					0.4667					0.2					0.2
		13					0.1					3.74999					0.4118					0.1176					0.2353
		12					-0.1167					6.23245					0.2857					0.2143					0.2143
		15					-0.8					8.5272					0.2667					0.2					0.4
		13					-0.4692					3.84995					0.2143					0.2857					0.2143
		12					-0.3167					3.55006					0.3077					0.2308					0.3846
		15					-0.1267					8.5272					0.2778					0.1667					0.2222
		14					-0.1857					6.15812					0.6					0.1333					0.1333
		16					-0.425					3.74999					0.4375					0.125					0.125
		12					0.4083					3.61369					0.4286					0.3571					0.1429
		13					-0.3846					3.74999					0.4286					0.1429					0.2143
		12					0.4083					5.91951					0.5					0.1429					0.1429
		14					-0.6					5.91951					0.375					0.125					0.25
		14					-0.3071					3.74999					0.4615					0.1538					0.2308
		14					0.4071					3.38003					0.4667					0.2					0.1333
		10					-0.48					3.55006					0.5333					0.1333					0.0667
		14					0.7643					6.31497					0.5					0.125					0.1875
		17					0.0647					3.49189					0.5333					0.2667					0.0667
		13					-0.5538					4.18436					0.4375					0.125					0.25
		15					-0.56					3.61369					0.4667					0.2					0.0667
		14					-0.9929					3.74999					0.4667					0.1333					0.1333
		13					-0.3692					3.55006					0.5714					0.1429					0.1429
		16					-0.1438					3.74999					0.4167					0.0833					0.25
		16					-0.025					3.55006					0.6					0.1333					0.0667
