# Supplementary material for: Tissue-specific shaping of the TCR repertoire and antigen specificity of iNKT cells
Source: eLife. 2019 Dec 16;8:e51663. doi: 10.7554/eLife.51663 (PMC6930077; doi:10.7554/eLife.51663)
Supplement: Figure 1—source data 1. [file elife-51663-fig1-data1.xlsx]

## Sheet: Fig1A
	Figure 1A
	Frequency of Vb+ NKT cells obtained from Flow-cytometry data
	Frequency of Vb7+ NKT cells					Frequency of Vb8+ NKT cells					Frequency of Vbother+ NKT cells
	thymus	iLN	mLN	spleen		thymus	iLN	mLN	spleen		thymus	iLN	mLN	spleen
	18.5	12.8	14.3	14.3		53.7	47	41.3	54.9		27.8	40.2	44.4	30.8
	17.8	12.6	12.7	13.1		52.7	40.4	38.8	56		29.5	47	48.5	30.9
	18.6	11.8	17.4	13.6		51.9	42.7	40.7	54.9		29.5	45.5	41.9	31.5
	14.8	11.9	10.2	12.5		57.9	34.4	38	56.3		27.3	53.7	51.8	31.2
	13.3	6.8	9.75	11.2		56.7	34.4	36	57		30	58.8	54.25	31.8
	15.7	7.29	9.12	13.5		55.6	34.1	27.2	55.8		28.7	58.61	63.68	30.7
	15.9	16.9	17.2	13.2		55.5	44.8	46.9	55.2		28.6	38.3	35.9	31.6
	16.3	11.7	18.9	13.4		54.7	51.4	45.6	56.5		29	36.9	35.5	30.1
	16.2	12.3	16.7	14		51.4	45.9	47.6	56		32.4	41.8	35.7	30
	14.3	13.5	14.7	14		54.4	51.4	43.5	55.4		31.3	35.1	41.8	30.6
	13.9	12.2	11.2	13.4		52.8	44	47.2	53		33.3	43.8	41.6	33.6
	13.4	13.3	14.4	12.9		56.9	45.2	47.1	56.6		29.7	41.5	38.5	30.5
	14.1	15.1	21.2	13.9		54.3	52.9	42.7	57.7		31.6	32	36.1	28.4
	16.1	9.09	17.4	14.1		58	55.5	48.2	57.9		25.9	35.41	34.4	28
	16.4	9.76	16.3	13.8		57.4	57.3	40.2	56.8		26.2	32.94	43.5	29.4

## Sheet: Fig1B
	Figure 1B
	Frequency of TRBV+ sequences calculated from RNAseq data obtained from 4 individual samples (s1-s4) per tissue
		thymus				spleen				mLN				iLN
		s1	s2	s3	s4	s1	s2	s3	s4	s1	s2	s3	s4	s1	s2	s3	s4
	TRBV1	9.22509	11.2836	15.9383	14.7166	18.648	16.3607	17.7419	16.5242	12.4711	19.1748	18.5764	12.0993	24.3968	13.4045	26.8939	15.7103
	TRBV12-1	0.369004	0.207039	0	0	0.4662	0	0	0.379867	0	0	0	0.103413	0	0	0	1.03481
	TRBV12-2	0	0.10352	0	0.274223	0.2331	0	0	0	0	0	0	0.620476	0	0	0	0.28222
	TRBV13-1	16.9742	6.00414	7.71208	9.96344	10.2564	9.73663	15.8602	9.68661	18.2448	8.25243	15.625	7.75595	13.6729	15.6584	11.3636	14.4873
	TRBV13-2	39.1144	41.3043	34.9614	35.0091	36.8298	35.834	36.0215	44.8243	27.4827	36.0841	23.6111	36.6081	19.3029	29.8932	36.3636	29.7272
	TRBV13-3	8.11808	8.38509	12.0823	10.9689	8.39161	11.253	10.2151	4.65337	8.08314	14.2395	11.2847	14.2709	21.7158	10.2017	12.1212	7.4318
	TRBV14	0	0	0.514139	0.182815	0.2331	0.399042	0	0	0	0	0	0.103413	0	0	0.378788	1.4111
	TRBV15	1.10701	1.13872	1.28535	0.365631	0.699301	0.239425	0.537634	0.664767	0.692841	0.242718	0.694444	1.44778	0.268097	0.711744	0	1.4111
	TRBV16	0.369004	0.10352	0	1.00548	0.2331	0.718276	0.537634	1.51947	1.15473	0	0.347222	0.41365	1.60858	0.948992	0	1.88147
	TRBV17	6.27306	0.310559	0	0.731261	4.4289	1.19713	1.6129	3.03894	4.15704	2.18447	0.868056	1.34436	1.87668	0.355872	1.51515	2.16369
	TRBV19	0	0.414079	0.514139	1.46252	0.2331	0.558659	0	0.759734	3.00231	0.889968	1.04167	0.206825	0	0.355872	0	0
	TRBV2	0	0.517598	0.257069	0.274223	0	0	0.268817	0.569801	0	0	0	0	0	3.32147	0	0
	TRBV20	0	0.207039	0.514139	0.548446	0	0	0.537634	0	0	0	1.38889	0.310238	0.268097	2.25386	0	0
	TRBV21	0	0.10352	0	0	0.4662	0	0	0	0	0.323625	0	0.206825	0	0	0	0
	TRBV23	0	0	0	0	0	0	0.268817	0	0	0	0	0	0	0	0	0
	TRBV24	0	0.207039	0.257069	0	0	0	0	0	0	0	0	0	0	0	0	0
	TRBV26	0	0	0.257069	0.365631	0	0.159617	0.268817	0	0.230947	0	0	1.03413	0	0	0	0.376294
	TRBV29	15.1292	26.6046	22.365	21.8464	15.1515	16.68	14.7849	14.245	20.0924	15.6149	22.5694	18.6143	10.7239	16.9632	10.6061	20.6021
	TRBV3	0.369004	0.414079	0	0.731261	0.2331	0.478851	0.268817	0.759734	0.461894	0.242718	0.173611	1.13754	0.536193	2.72835	0	0.940734
	TRBV30	0	0	0.257069	0	0	0	0	0	0	0	0	0	0	0	0	0
	TRBV31	0.369004	0.10352	0.257069	0.0914077	0.932401	0.877893	0.268817	0.379867	0.461894	0.161812	2.77778	1.13754	0	0.355872	0	0.658514
	TRBV4	1.47601	1.24224	0.257069	1.37112	0.932401	5.02793	0.268817	1.04463	1.15473	0.0809061	0	0.41365	0.268097	1.18624	0.378788	0.28222
	TRBV5	1.10701	1.34576	2.57069	0.0914077	1.6317	0.478851	0.537634	0.949668	2.30947	2.42718	1.04167	2.17166	5.36193	1.30486	0.378788	1.59925

## Sheet: Fig1E
	Figure 1E
	Counts for each unique CDR3b sequence obtainted from RNAseq data (sequences pooled from 4 samples per tissue)
		thymus	spleen	mLN	iLN
		1	1	1	1
		1	1	1	1
		1	1	1	1
		1	1	1	1
		1	1	1	1
		1	1	1	1
		1	1	1	1
		1	1	1	1
		1	1	1	1
		1	1	1	1
		1	1	1	1
		1	1	1	1
		1	1	1	1
		1	1	1	1
		1	1	1	1
		1	1	1	1
		1	1	1	1
		1	1	1	1
		1	1	1	1
		1	1	1	1
		1	1	1	1
		1	1	1	1
		1	1	1	1
		1	1	1	1
		1	1	1	1
		1	1	1	1
		1	1	1	1
		1	1	1	1
		1	1	1	1
		1	1	1	1
		1	1	1	1
		1	1	1	1
		1	1	1	1
		1	1	1	1
		1	1	1	1
		1	1	1	1
		1	1	1	1
		1	1	1	1
		1	1	1	1
		1	1	1	1
		1	1	1	1
		1	1	1	1
		1	1	1	1
		1	1	1	1
		1	1	1	1
		1	1	1	1
		1	1	1	1
		1	1	1	1
		1	1	1	1
		1	1	1	1
		1	1	1	1
		1	1	1	1
		1	1	1	1
		1	1	1	1
		1	1	1	1
		1	1	1	1
		1	1	1	1
		1	1	1	1
		1	1	1	1
		1	1	1	1
		1	1	1	1
		1	1	1	1
		1	1	1	1
		1	1	1	1
		1	1	1	1
		1	1	1	1
		1	1	1	1
		1	1	1	1
		1	1	1	1
		1	1	1	1
		1	1	1	1
		1	1	1	1
		1	1	1	1
		1	1	1	1
		1	1	1	1
		1	1	1	1
		1	1	1	1
		1	1	1	1
		1	1	1	1
		1	1	1	1
		1	1	1	1
		1	1	1	1
		1	1	1	1
		1	1	1	1
		1	1	1	1
		1	1	1	1
		1	1	1	1
		1	1	1	1
		1	1	1	1
		1	1	1	1
		1	1	1	1
		1	1	1	1
		1	1	1	1
		1	1	1	1
		1	1	1	1
		1	1	1	1
		1	1	1	1
		1	1	1	1
		1	1	1	1
		1	1	1	1
		1	1	1	1
		1	1	1	1
		1	1	1	1
		1	1	1	1
		1	1	1	1
		1	1	1	1
		1	1	1	1
		1	1	1	1
		1	1	1	1
		1	1	1	1
		1	1	1	1
		1	1	1	1
		1	1	1	1
		1	1	1	1
		1	1	1	1
		1	1	1	1
		1	1	1	1
		1	1	1	1
		1	1	1	1
		1	1	1	1
		1	1	1	1
		1	1	1	1
		1	1	1	1
		1	1	1	1
		1	1	1	1
		1	1	1	1
		1	1	1	1
		1	1	1	1
		1	1	1	1
		1	1	1	1
		1	1	1	1
		1	1	1	1
		1	1	1	1
		1	1	1	1
		1	1	1	1
		1	1	1	1
		1	1	1	1
		1	1	1	1
		1	1	1	1
		1	1	1	1
		1	1	1	1
		1	1	1	1
		1	1	1	1
		1	1	1	1
		1	1	1	1
		1	1	1	1
		1	1	1	1
		1	1	1	2
		1	1	1	2
		1	1	1	2
		1	1	1	2
		1	1	1	2
		1	1	1	2
		1	1	1	2
		1	1	1	2
		1	1	1	2
		1	1	1	2
		1	1	1	2
		1	1	1	2
		1	1	1	2
		1	1	1	2
		1	1	1	2
		1	1	1	2
		1	1	1	2
		1	1	1	2
		1	1	1	2
		1	1	1	2
		1	1	1	2
		1	1	1	2
		1	1	1	2
		1	1	1	2
		1	1	1	2
		1	1	1	2
		1	1	1	2
		1	1	1	2
		1	1	1	2
		1	1	1	2
		1	1	1	2
		1	1	1	2
		1	1	1	2
		1	1	1	2
		1	1	1	2
		1	1	1	2
		1	1	1	2
		1	1	1	2
		1	1	1	2
		1	1	1	2
		1	1	1	2
		1	1	1	2
		1	1	1	2
		1	1	1	2
		1	1	1	2
		1	1	1	2
		1	1	1	2
		1	1	1	2
		1	1	1	2
		1	1	1	2
		1	1	1	2
		1	1	1	2
		1	1	1	2
		1	1	1	2
		1	1	1	2
		1	1	1	2
		1	1	1	2
		1	1	1	3
		1	1	1	3
		1	1	1	3
		1	1	1	3
		1	1	1	3
		1	1	1	3
		1	1	1	3
		1	1	1	3
		1	1	1	3
		1	1	1	3
		1	1	1	3
		1	1	1	3
		1	1	1	3
		1	1	1	3
		1	1	1	3
		1	1	1	3
		1	1	1	3
		1	1	1	3
		1	1	1	3
		1	1	1	3
		1	1	1	3
		1	1	1	3
		1	1	1	3
		1	1	1	3
		1	1	1	3
		1	1	1	3
		1	1	1	3
		1	1	1	3
		1	1	1	3
		1	1	1	3
		1	1	1	3
		1	1	1	3
		1	1	1	3
		1	1	1	3
		1	1	1	3
		1	1	1	3
		1	1	1	3
		1	1	1	3
		1	1	1	3
		1	1	1	3
		1	1	1	3
		1	1	1	4
		1	1	1	4
		1	1	1	4
		1	1	1	4
		1	1	1	4
		1	1	1	4
		1	1	1	4
		1	1	1	4
		1	1	1	4
		1	1	1	4
		1	1	1	4
		1	1	1	4
		1	1	1	4
		1	1	1	4
		1	1	1	4
		1	1	1	4
		1	1	1	4
		1	1	1	4
		1	1	1	4
		1	1	1	4
		1	1	1	4
		1	1	1	4
		1	1	1	4
		1	1	1	5
		1	1	1	5
		1	1	1	5
		1	1	1	5
		1	1	1	5
		1	1	1	5
		1	1	1	5
		1	1	1	5
		1	1	1	5
		1	1	1	5
		1	1	1	5
		1	1	1	5
		1	1	1	5
		1	1	1	5
		1	1	1	5
		1	1	1	5
		1	1	1	6
		1	1	1	6
		1	1	1	6
		1	1	1	6
		1	1	1	6
		1	1	1	6
		1	1	1	6
		1	1	1	6
		1	1	1	6
		1	1	1	6
		1	1	1	6
		1	1	1	6
		1	1	1	7
		1	1	1	7
		1	1	1	7
		1	1	1	7
		1	1	1	7
		1	1	1	7
		1	1	1	7
		1	1	1	7
		1	1	1	7
		1	1	1	7
		1	1	1	7
		1	1	1	8
		1	1	1	8
		1	1	1	8
		1	1	1	8
		1	1	1	8
		1	1	1	8
		1	1	1	8
		1	1	1	8
		1	1	1	8
		1	1	1	8
		1	1	1	9
		1	1	1	9
		1	1	1	9
		1	1	1	9
		1	1	1	10
		1	1	1	10
		1	1	1	10
		1	1	1	10
		1	1	1	10
		1	1	1	11
		1	1	1	11
		1	1	1	11
		1	1	1	11
		1	1	1	11
		1	1	1	12
		1	1	1	12
		1	1	1	12
		1	1	1	12
		1	1	1	12
		1	1	1	13
		1	1	1	13
		1	1	1	14
		1	1	1	14
		1	1	1	14
		1	1	1	14
		1	1	1	14
		1	1	1	15
		1	1	1	16
		1	1	1	16
		1	1	1	16
		1	1	1	17
		1	1	1	17
		1	1	1	18
		1	1	1	18
		1	1	1	19
		1	1	1	19
		1	1	1	23
		1	1	1	23
		1	1	1	25
		1	1	1	25
		1	1	1	26
		1	1	1	27
		1	1	1	32
		1	1	1	41
		1	1	1
		1	1	1
		1	1	1
		1	1	1
		1	1	1
		1	1	1
		1	1	1
		1	1	1
		1	1	1
		1	1	1
		1	1	1
		1	1	1
		1	1	1
		1	1	1
		1	1	1
		1	1	1
		1	1	1
		1	1	1
		1	1	1
		1	1	1
		1	1	1
		1	1	1
		1	1	1
		1	1	1
		1	1	1
		1	1	1
		1	1	1
		1	1	1
		1	1	2
		1	1	2
		1	1	2
		1	1	2
		1	1	2
		1	1	2
		1	1	2
		1	1	2
		1	1	2
		1	1	2
		1	1	2
		1	1	2
		1	1	2
		1	1	2
		1	1	2
		1	1	2
		1	1	2
		1	1	2
		1	1	2
		1	1	2
		1	1	2
		1	1	2
		1	1	2
		1	1	2
		1	1	2
		1	1	2
		1	1	2
		1	1	2
		1	1	2
		1	1	2
		1	1	2
		1	1	2
		1	1	2
		1	1	2
		1	1	2
		1	1	2
		1	1	2
		1	1	2
		1	1	2
		1	1	2
		1	1	2
		1	1	2
		1	1	2
		1	1	2
		1	1	2
		1	1	2
		1	1	2
		1	1	2
		1	1	2
		1	1	2
		1	1	2
		1	1	2
		1	1	2
		1	1	2
		1	1	2
		1	1	2
		1	1	2
		1	1	2
		1	1	2
		1	1	2
		1	1	2
		1	1	2
		1	1	2
		1	1	2
		1	1	2
		1	1	2
		1	1	2
		1	1	2
		1	1	2
		1	1	2
		1	1	2
		1	1	2
		1	1	2
		1	1	2
		1	1	2
		1	1	2
		1	1	2
		1	1	2
		1	1	2
		1	1	2
		1	1	2
		1	1	2
		1	1	2
		1	1	2
		1	1	2
		1	1	2
		1	1	2
		1	1	2
		1	1	2
		1	1	2
		1	1	2
		1	1	2
		1	1	2
		1	1	2
		1	1	2
		1	1	2
		1	1	2
		1	1	2
		1	1	2
		1	1	2
		1	1	2
		1	1	2
		1	1	2
		1	1	2
		1	1	2
		1	1	2
		1	1	2
		1	1	2
		1	1	2
		1	1	2
		1	1	2
		1	1	2
		1	1	2
		1	1	2
		1	1	2
		1	1	2
		1	1	2
		1	1	2
		1	1	2
		1	1	2
		1	1	2
		1	1	2
		1	1	2
		1	1	2
		1	1	2
		1	1	2
		1	1	2
		1	1	2
		1	1	2
		1	1	2
		1	1	2
		1	1	2
		1	1	2
		1	1	2
		1	1	2
		1	1	2
		1	1	2
		1	1	2
		1	1	2
		1	1	2
		1	1	2
		1	1	2
		1	1	2
		1	1	2
		1	1	2
		1	1	2
		1	1	3
		1	1	3
		1	1	3
		1	1	3
		1	1	3
		1	1	3
		2	1	3
		2	1	3
		2	1	3
		2	1	3
		2	1	3
		2	1	3
		2	1	3
		2	1	3
		2	1	3
		2	1	3
		2	1	3
		2	1	3
		2	1	3
		2	1	3
		2	1	3
		2	1	3
		2	1	3
		2	1	3
		2	1	3
		2	1	3
		2	1	3
		2	1	3
		2	1	3
		2	2	3
		2	2	3
		2	2	3
		2	2	3
		2	2	3
		2	2	3
		2	2	3
		2	2	3
		2	2	3
		2	2	3
		2	2	3
		2	2	3
		2	2	3
		2	2	3
		2	2	3
		2	2	3
		2	2	3
		2	2	3
		2	2	3
		2	2	3
		2	2	3
		2	2	3
		2	2	3
		2	2	3
		2	2	3
		2	2	3
		2	2	3
		2	2	3
		2	2	3
		2	2	3
		2	2	3
		2	2	3
		2	2	3
		2	2	3
		2	2	3
		2	2	3
		2	2	3
		2	2	3
		2	2	3
		2	2	3
		2	2	3
		2	2	3
		2	2	3
		2	2	3
		2	2	3
		2	2	3
		2	2	3
		2	2	3
		2	2	3
		2	2	3
		2	2	3
		2	2	3
		2	2	3
		2	2	4
		2	2	4
		2	2	4
		2	2	4
		2	2	4
		2	2	4
		2	2	4
		2	2	4
		2	2	4
		2	2	4
		2	2	4
		2	2	4
		2	2	4
		2	2	4
		2	2	4
		2	2	4
		2	2	4
		2	2	4
		2	2	4
		2	2	4
		2	2	4
		2	2	4
		2	2	4
		2	2	4
		2	2	4
		2	2	4
		2	2	4
		2	2	4
		2	2	4
		2	2	4
		2	2	4
		2	2	4
		2	2	4
		2	2	4
		2	2	4
		2	2	4
		2	2	4
		2	2	4
		2	2	4
		2	2	4
		2	2	4
		2	2	4
		2	2	5
		2	2	5
		2	2	5
		2	2	5
		2	2	5
		2	2	5
		2	2	5
		2	2	5
		2	2	5
		2	2	5
		2	2	5
		2	2	5
		2	2	5
		2	2	5
		2	2	5
		2	2	5
		2	2	5
		2	2	5
		2	2	5
		2	2	5
		2	2	5
		2	2	5
		2	2	5
		2	2	5
		2	2	5
		2	2	5
		2	2	5
		2	2	5
		2	2	6
		2	2	6
		2	2	6
		3	2	6
		3	2	6
		3	2	6
		3	2	6
		3	2	6
		3	2	6
		3	2	6
		3	2	6
		3	2	6
		3	2	6
		3	2	6
		3	2	6
		3	2	6
		3	2	6
		3	2	6
		3	2	7
		3	2	7
		3	2	7
		3	2	7
		3	2	7
		3	2	7
		3	2	7
		3	2	7
		3	2	7
		3	2	7
		3	2	7
		3	2	7
		3	2	7
		3	2	7
		3	2	7
		3	2	8
		3	2	8
		3	3	8
		3	3	8
		3	3	8
		3	3	9
		3	3	9
		3	3	9
		3	3	9
		3	3	9
		3	3	9
		3	3	9
		3	3	9
		3	3	10
		3	3	10
		3	3	10
		3	3	10
		3	3	10
		3	3	11
		3	3	11
		3	3	11
		3	3	12
		3	3	12
		3	3	12
		3	3	12
		3	3	13
		3	3	13
		3	3	13
		3	3	14
		3	3	14
		3	3	15
		4	3	15
		4	3	15
		4	3	16
		4	3	16
		4	3	17
		4	3	19
		4	3	20
		4	3	21
		4	3	22
		4	3	24
		4	3	25
		4	3	30
		4	3
		4	3
		4	3
		4	3
		4	3
		4	3
		4	3
		4	3
		4	3
		4	3
		4	3
		4	3
		4	3
		4	3
		4	3
		4	3
		4	3
		5	3
		5	4
		5	4
		5	4
		5	4
		5	4
		5	4
		5	4
		5	4
		5	4
		5	4
		5	4
		5	4
		5	4
		5	4
		5	4
		5	4
		5	4
		5	4
		5	4
		5	4
		5	4
		5	4
		5	4
		5	4
		5	4
		5	4
		5	4
		5	4
		5	4
		5	4
		5	5
		6	5
		6	5
		6	5
		6	5
		6	5
		6	5
		7	5
		7	5
		7	5
		7	5
		7	5
		7	5
		7	5
		9	5
		9	5
		9	5
		9	5
		9	5
		9	6
		10	6
		10	6
		10	6
		11	6
		11	6
		11	6
		11	6
		12	6
		12	6
		13	6
		14	6
		14	6
		16	6
		17	6
		17	6
		18	6
		26	6
		27	6
			6
			6
			6
			7
			7
			8
			8
			8
			8
			8
			8
			8
			9
			9
			9
			9
			9
			10
			10
			11
			11
			11
			11
			11
			13
			14
			14
			15
			15
			16
			18
			33

## Sheet: Fig1F
		Figure 1F
		Frequency of CDR3b sequences obtained from RNAseq data present once, twice, 3, 4 or 5 or more times in our dataset
			thymus	spleen	mLN	iLN
		1	63.72	64.02	50.98	40.72
		2	17.55	17.93	19.13	18.79
		3	7.18	6.7	10.75	11.36
		4	3.42	3.41	5.5	6.37
		5 (+)	8.1	7.9	13.62	25.5

## Sheet: Fig 1G
		Figure 1G
		Cumulative frequency for the first 25 most prevalent clonotypes for each individual sample (s1-s4)
		thymus				Spleen				mLN				iLN
		s1	s2	s3	s4	s1	s2	s3	s4	s1	s2	s3	s4	s1	s2	s3	s4
		4	1.28205	5.76923	4.63458	3.24074	1.34048	7.41573	3.76569	2.06422	2.07254	5.01044	5.82524	3.73333	12.1673	11.9186	5.30612
		5.81818	2.30769	9.61538	7.66488	4.39815	2.68097	10.7865	7.11297	3.89908	3.97237	9.60334	10.6796	7.2	19.3916	19.7674	10
		7.27273	3.33333	13.2479	10.1604	5.32407	4.02145	13.9326	10.251	5.50459	5.87219	13.7787	14.7573	10.4	25.8555	27.0349	14.6939
		8.72727	4.35897	16.6667	12.2995	6.25	5.09383	16.1798	12.9707	6.88073	7.4266	17.7453	17.6699	13.6	31.9392	34.3023	18.5714
		9.81818	5.12821	19.6581	14.2602	6.94444	6.16622	18.2022	15.272	8.25688	8.63558	21.2944	20.5825	16.5333	35.7414	39.5349	22.0408
		10.9091	5.89744	22.4359	16.221	7.63889	7.23861	20.2247	17.5732	9.40367	9.84456	24.6347	23.301	19.4667	39.5437	44.7674	25.3061
		12	6.66667	25	18.1818	8.33333	8.31099	22.2472	19.8745	10.5505	11.0535	27.9749	25.6311	21.8667	42.9658	48.8372	28.5714
		13.0909	7.4359	27.1368	19.9643	9.02778	9.38338	24.0449	22.1757	11.6972	12.2625	31.1065	27.9612	24.2667	45.6274	52.907	31.6327
		14.1818	8.20513	29.0598	21.7469	9.72222	10.1877	25.8427	24.477	12.844	13.2988	34.0292	30.2913	26.4	48.289	56.9767	34.4898
		15.2727	8.97436	30.9829	23.3512	10.4167	10.992	27.6404	26.569	13.9908	14.3351	36.7432	32.233	28.5333	50.9506	60.7558	36.9388
		16.3636	9.48718	32.906	24.9554	11.1111	11.7962	29.4382	28.4519	15.1376	15.3713	39.4572	34.1748	30.6667	53.6122	63.9535	39.3878
		17.4545	10	34.4017	26.5597	11.8056	12.6005	31.0112	30.3347	16.055	16.4076	42.1712	35.9223	32.5333	56.2738	66.5698	41.8367
		18.5455	10.5128	35.8974	27.8075	12.5	13.4048	32.3596	32.0084	16.9725	17.4439	44.4676	37.4757	34.4	58.5551	68.8953	44.0816
		19.6364	11.0256	37.1795	29.0553	13.1944	14.2091	33.7079	33.682	17.8899	18.4801	46.5553	39.0291	36	60.8365	71.2209	46.3265
		20.7273	11.5385	38.2479	30.303	13.8889	15.0134	35.0562	35.3556	18.8073	19.5164	48.643	40.5825	37.6	63.1179	73.5465	48.3673
		21.8182	12.0513	39.3162	31.5508	14.5833	15.8177	36.4045	36.8201	19.7248	20.5527	50.7307	41.9417	39.2	65.019	75.2907	50.4082
		22.9091	12.5641	40.3846	32.7986	15.2778	16.622	37.7528	38.0753	20.6422	21.4162	52.6096	43.301	40.8	66.9202	77.0349	52.449
		24	13.0769	41.453	33.8681	15.9722	17.1582	39.1011	39.3305	21.5596	22.2798	54.4885	44.6602	42.4	68.4411	78.4884	54.0816
		25.0909	13.5897	42.5214	34.9376	16.6667	17.6944	40.4494	40.5858	22.4771	23.1434	56.3674	46.0194	43.7333	69.962	79.9419	55.7143
		25.8182	14.1026	43.5897	36.0071	17.3611	18.2306	41.7978	41.841	23.1651	24.0069	58.2463	47.3786	45.0667	71.4829	81.3953	57.3469
		26.5455	14.6154	44.6581	37.0766	17.8241	18.7668	43.1461	43.0962	23.8532	24.8705	60.1253	48.7379	46.4	72.6236	82.5581	58.9796
		27.2727	15.1282	45.7265	38.1462	18.287	19.3029	44.4944	44.3515	24.5413	25.734	61.7954	50.0971	47.7333	73.7643	83.7209	60.4082
		28	15.641	46.7949	39.0374	18.75	19.8391	45.8427	45.6067	25.2294	26.5976	63.2568	51.4563	49.0667	74.9049	84.8837	61.8367
		28.7273	16.1538	47.8632	39.9287	19.213	20.3753	47.191	46.8619	25.9174	27.4611	64.7182	52.6214	50.4	76.0456	85.7558	63.2653
		29.4545	16.6667	48.7179	40.82	19.6759	20.9115	48.5393	47.9079	26.6055	28.152	65.9708	53.7864	51.7333	77.1863	86.6279	64.6939
