# Supplementary material for: Tissue-specific shaping of the TCR repertoire and antigen specificity of iNKT cells
Source: eLife. 2019 Dec 16;8:e51663. doi: 10.7554/eLife.51663 (PMC6930077; doi:10.7554/eLife.51663)
Supplement: Figure 2—figure supplement 1—source data 1. [file elife-51663-fig2-figsupp1-data1.xlsx]

## Sheet: A
		Figure 2- figure supplement 1A
		Frequency of CCR7+PD1- iNKT cells
		thymus	spleen	mLN	iLN
		1.5	3.8	11.9	4.2
		0.4	5.2	8.5	4.5
		1.3	4.4	11.7	4.4
		2.5	2	16.4	11.9
		1.1	1.8	16.8	16.4

## Sheet: C
		Figure 2- figure supplement 1C
		Frequency Vb7+ or Vb8+ cells within CCR7+PD1- iNKT cells or iNKT cells excluded from the CCR7+PD-1- gate (rest)
		Frequency Vb7+ cells
		Thymus		Spleen		mLN		iLN
		CCR7+PD1-	rest	CCR7+PD1-	rest	CCR7+PD1-	rest	CCR7+PD1-	rest
		12.3	18.4	18	17.7	8.8	19.9	3.57	19.5
		15.4	15.2	20.1	5.3	13.4	17.6	13.6	21.3
		11	16.4	10.5	13.2	13.6	14.2	15.6	21.2
		10.7	16.4	12.5	15.7	1.9	17.2	3.3	19.1
		8.6	18.3	10.9	13.5	6.3	19.3	7.3	15.4
		Frequency Vb8+ cells
		Thymus		Spleen		mLN		iLN
		CCR7+PD1-	rest	CCR7+PD1-	rest	CCR7+PD1-	rest	CCR7+PD1-	rest
		47.4	61	47.2	60	42.3	56.8	57.1	59.3
		40	59.7	34.9	62.6	37.8	56.4	42.4	54.6
		55.9	59.9	49.7	59.7	36	48.3	19.4	52.9
		41.8	59.2	46	59.6	27.6	52.1	31.4	54.4
		40	55.2	48.3	59.2	31.8	51.2	30	51.7
