# Supplementary material for: Tissue-specific shaping of the TCR repertoire and antigen specificity of iNKT cells
Source: eLife. 2019 Dec 16;8:e51663. doi: 10.7554/eLife.51663 (PMC6930077; doi:10.7554/eLife.51663)
Supplement: Figure 2—source data 1. [file elife-51663-fig2-data1.xlsx]

## Sheet: Fig2A
	Figure 2A
	Frequency of GFP+ NKT RTE (from Rag2-GFP mice)
	thymus	spleen	mLN	iLN
	3.03	2.03	6.01	4.7
	2.44	1.69	7.51	2.52
	2.01	2.56	8.39	4.86
	3.18	1.79	12	3.22
	2.21	1.85	10.5	1.36
	3.32	1.41	8.1	3.29
	MFI for GFP in NKT RTE (from Rag2-GFP mice)
	thymus	spleen	mLN	iLN
	2699	532	406	214
	2012	347	547	291
	2084	428	431	303
	1779	584	465	475
	1912	320	463	295
	2986	442	334	341

## Sheet: Fig2B
	Figure 2B
	Frequency Vb7+ or Vb8+ cells within GFP+ or GFP- iNKT cells from Rag2-GFP mice
	Frequency Vb7+ cells
	Thymus		Spleen		mLN		iLN
	GFP+	GFP-	GFP+	GFP-	GFP+	GFP-	GFP+	GFP-
	10.8	13.9	5.1	10.6	11.9	13	3.3	14.2
	11.1	13.9	6.7	11.9	7.4	12.6	17	17.1
	13.4	11.9	8.6	9.9	6.3	12	3.1	10
	14.2	14.9	10.6	14.8	8.7	14.4	10.9	18.1
	12.6	12.6	9.3	12.6	1.6	12.7	4.8	12.3
	11.2	10.9	7.2	10.8	5.4	11.1	7.5	16.5
	Frequency Vb8+ cells
	Thymus		Spleen		mLN		iLN
	GFP+	GFP-	GFP+	GFP-	GFP+	GFP-	GFP+	GFP-
	57	61.1	66.3	63	41.6	57.6	66.7	57.3
	57.3	61.2	58.8	60.8	55.6	55.3	42.6	58.5
	54.1	59.6	76.5	61.7	67.1	55.6	56.2	60.3
	52.1	61.2	50.5	57.9	48	55.3	52.2	57.6
	57	60.4	71.4	60.4	67.7	52	52.4	57.3
	42.7	59.4	67.2	59.9	54.3	50.6	45	58.6
