# Supplementary material for: Tissue-specific shaping of the TCR repertoire and antigen specificity of iNKT cells
Source: eLife. 2019 Dec 16;8:e51663. doi: 10.7554/eLife.51663 (PMC6930077; doi:10.7554/eLife.51663)
Supplement: Figure 3—figure supplement 1—source data 1. [file elife-51663-fig3-figsupp1-data1.xlsx]

## Sheet: A
	Figure 3- figure supplement 1A
	Differentially expressed genes in iNKT cells from LNs vs. iNKT cells from spleen/thymus
	gene name	log2FoldChange	padj
	Klrk1	-1.67974	1.41404e-030*
	Gzma	-5.64668	4.83755e-022*
	Klrd1	-3.00179	1.90995e-020*
	Dennd4a	-1.4864	2.58691e-020*
	Klrc2	-2.63166	3.01043e-020*
	Il18rap	-1.37576	1.90833e-017*
	Styk1	-5.76469	6.79805e-016*
	Klrb1c	-1.25577	2.39192e-015*
	Klrc1	-2.06886	3.90122e-014*
	Il12rb2	-1.37136	3.90122e-014*
	Slamf7	-1.83913	5.24388e-014*
	Hbb-b1	-7.5756	4.96781e-013*
	Itga1	-1.56112	2.33098e-012*
	Nkg7	-1.57557	1.01183e-011*
	Fcer1g	-2.38775	1.0783e-011*
		-1.30063	1.74158e-010*
	Klre1	-3.33421	1.92755e-010*
	H2-Q7	-1.07388	2.99019e-010*
	Lrrk1	-3.14169	6.66732e-010*
	Kcnj8	-4.6745	7.21152e-010*
	Fasl	-1.14282	1.14836e-009*
	Fgl2	-1.28506	2.66758e-009*
	Lpar6	-0.967104	3.693e-009*
		-2.69821	1.03432e-008*
	Klra13-ps	-6.11418	1.78517e-008*
	Klra5	-5.90331	1.9924e-008*
	Abcb1a	-1.18909	2.27959e-008*
		-6.44714	2.3559e-008*
	Hnrnph1	-1.01906	4.64236e-008*
		-1.94291	5.52525e-008*
	Flt3l	-1.07184	1.05334e-007*
	Mylip	-0.770813	1.47871e-007*
	H2-Q5	-1.79051	1.47871e-007*
	Fam19a3	-4.12243	1.56818e-007*
	Klri2	-3.03466	1.61548e-007*
	Atp8b4	-0.871406	2.07235e-007*
	Ogt	-1.10777	2.36536e-007*
	Cd160	-1.37641	3.08927e-007*
	Rhno1	-1.64871	4.93443e-007*
	Xcl1	-1.1139	0.000001*
	Efhd2	-0.954822	0.000001*
	Srsf1	-1.1336	0.000001*
	Pvrig	-1.3812	0.000001*
	Chsy1	-0.905653	0.000001*
	Arsb	-0.83973	0.000001*
	Ergic2	-1.10277	0.000001*
	Nlrc5	-1.0076	0.000002*
	Peak1	-0.822725	0.000003*
	Padi2	-0.971737	0.000003*
	Mirt1	-1.59671	0.000003*
	Gimap4	-0.581582	0.000003*
	Gas7	-4.71449	0.000004*
	Tmem163	-3.3955	0.000004*
	Bcl2	-0.752732	0.000004*
	Hbb-b1	-6.36372	0.000004*
	Klra9	-3.54797	0.000004*
	Sytl3	-1.69501	0.000004*
	Hip1	-2.48068	0.000005*
	Ctla2a	-0.919444	0.000005*
	Rsrp1	-1.31936	0.000005*
	Irf3	-1.09526	0.000005*
	Tmem181a	-1.29724	0.000005*
	Dennd1c	-0.974903	0.000006*
	Gem	-1.68788	0.000006*
	Dok2	-1.00145	0.000006*
		-1.97162	0.000006*
	Tm6sf1	-1.61379	0.000007*
	5430427O19Rik	-2.20959	0.000009*
	Nbeal2	-1.2519	0.000009*
	Arhgap9	-0.685671	0.000013*
	Samd3	-1.0243	0.000018*
	Slc2a3	-1.02971	0.000019*
	Gbp8	-1.51838	0.000019*
		-1.40894	0.000022*
	Eif4a2	-0.63714	0.000022*
	Ifi213	-0.921808	0.000025*
	Malat1	-0.764903	0.000027*
		-0.783493	0.000028*
	Nmnat2	-2.58516	0.000042*
	Fgd5	-4.27653	0.000048*
		-2.95848	0.000048*
	Ppm1j	-2.32717	0.000051*
	Arglu1	-1.10298	0.000051*
	Hba-a2	-4.80816	0.000056*
	Eps15l1	-0.871483	0.000059*
	Klra6	-4.37636	0.000059*
		-6.36669	0.000079*
	Zswim8	-0.908152	0.000085*
	Oas1b	-1.6221	0.000089*
		-2.08019	0.000093*
	Zc3h7a	-0.810431	0.0001*
	Ppox	-2.49961	0.000101*
	Pik3r5	-0.859106	0.000119*
	Txk	-0.590943	0.000126*
	Crebzf	-0.900741	0.000126*
	Zfp598	-1.09374	0.000129*
	Acap1	-0.838559	0.000154*
	Tbx21	-1.10844	0.000175*
	Tex2	-0.855462	0.000178*
	Rasal3	-0.729808	0.000202*
	H2-Q10	-1.46965	0.000202*
	Ly6c2	-0.972781	0.000203*
	Tjp1	-4.94683	0.000208*
	Pde7a	-0.724862	0.00021*
	BC030336	-1.08229	0.000216*
	Hectd4	-0.751181	0.000216*
	Ccnl2	-0.991961	0.000218*
	Cc2d1a	-1.62194	0.00022*
	2410002F23Rik	-0.986751	0.000222*
	E2f4	-0.899018	0.000225*
	Anxa2	-1.54206	0.000278*
	Dapk2	-3.48764	0.000281*
	Tnfsf10	-0.775346	0.000285*
	Nedd4	-0.782943	0.000327*
	Nr3c1	-0.538392	0.000369*
		-1.45038	0.000408*
	Zzef1	-0.625896	0.000412*
	Mettl17	-1.32228	0.000427*
		-0.704789	0.000446*
	Caml	-1.90717	0.000507*
	Cln3	-1.34432	0.000513*
	Cysltr2	-1.11118	0.000539*
	Hdgfl3	-1.01784	0.000575*
	Hnrnpdl	-0.579237	0.000591*
		-5.24345	0.000609*
		-1.32444	0.000634*
	Il2rb	-0.695656	0.00068*
	Tmem199	-2.19207	0.000707*
	Srp54a	-13.2176	0.000773*
	Aup1	-1.29242	0.000797*
	Hsd11b1	-1.00922	0.000881*
	Nadsyn1	-2.46678	0.000888*
	Klrc3	-4.36107	0.000896*
	Atp6v0b	-1.41196	0.000906*
	2900076A07Rik	-2.48394	0.000977*
	Myo9b	-0.745047	0.0009860001*
	Gdi1	-0.695717	0.001037*
	Ddx43	-1.77006	0.001063*
	Crybg1	-0.812599	0.001078*
	Apol7e	-0.822158	0.001104*
	Plekhb1	-3.36464	0.001117*
	Ptprj	-0.861594	0.001149*
		-2.37032	0.001189*
	Sap25	-1.43845	0.001223*
	Hopx	-1.06591	0.001316*
		-3.44976	0.001404*
	Nav1	-3.47272	0.00146*
	Tmem191c	-2.83278	0.001483*
	Dusp3	-4.89405	0.001486*
	Fuz	-1.709	0.001501*
	H2-Q8	-0.918928	0.001515*
	Sytl2	-0.580596	0.001809*
	Fcgr3	-5.52983	0.001812*
		-1.52074	0.001821*
		-1.13441	0.001866*
	Neat1	-1.32988	0.001991*
	Gpx4	-1.23565	0.002134*
	Slc25a37	-0.84624	0.002149*
	Rag1	-4.46333	0.002149*
	Tedc1	-2.36585	0.002157*
	Hbegf	-2.1944	0.002184*
	F730043M19Rik	-4.40003	0.002214*
		-1.17724	0.002263*
	Cdc123	-0.685534	0.002263*
	Cipc	-1.04687	0.002283*
	Eme2	-1.3771	0.002423*
	Malt1	-0.655822	0.002423*
	Klra7	-2.89174	0.002438*
	Ndnf	-2.81716	0.002464*
	Cog3	-0.636963	0.002596*
	Ccr5	-0.919699	0.002654*
	Mx1	-2.10559	0.002719*
	Ube2d1	-0.932859	0.002742*
	Myo1f	-0.820922	0.002851*
		-3.1397	0.002885*
	Rap1gap2	-3.20766	0.003052*
	Prf1	-2.28005	0.003128*
		-4.03312	0.003166*
	Akap7	-2.83339	0.003307*
	Mxd4	-0.599085	0.003313*
	Grb7	-2.79236	0.003469*
	Sdf2	-1.31656	0.003534*
	Cracr2a	-1.1952	0.003626*
	Hba-a1	-4.59959	0.003653*
	Lamtor4	-1.26113	0.003766*
	Ubap2	-0.853716	0.003766*
	Brd9	-1.1632	0.003811*
	BC037034	-1.28397	0.003819*
	Kank3	-4.17649	0.003819*
	Chkb	-1.63219	0.004074*
	Diablo	-1.01725	0.004241*
	Papd7	-0.989859	0.004253*
	Rbm10	-1.13003	0.00428*
	Ikbkb	-0.682888	0.004287*
	Mtcp1	-1.45465	0.004302*
	Gbp7	-0.512539	0.004322*
	Cables1	-3.83159	0.004417*
	Kmt2d	-1.0819	0.004482*
	Cops3	-0.89085	0.004498*
	Mrpl24	-0.774611	0.004521*
		-2.7136	0.004531*
	Alkbh6	-1.42945	0.004653*
	Pogk	-0.791109	0.004773*
	Ctla2b	-1.41962	0.004786*
	Spns1	-1.46829	0.004802*
	Cycs	-0.895584	0.004875*
	Snhg20	-2.85466	0.004898*
	Pygl	-4.02128	0.004938*
	Soat2	-1.2333	0.004996*
	Tcirg1	-0.933239	0.004996*
	Zfp692	-2.67879	0.005004*
		-3.70158	0.005025*
		-0.748421	0.005056*
	Zfc3h1	-0.740478	0.005254*
	Gramd3	-0.743434	0.005254*
	Commd4	-0.972034	0.00529*
	Ccdc134	-2.40503	0.005344*
	Cfap54	-1.49478	0.005344*
		-1.09868	0.005365*
	Ppp1r12a	-0.476776	0.005365*
		-3.67642	0.00553*
	Clec2d	-0.544738	0.005848*
	Gzmb	-2.96598	0.005926*
	Nyx	-0.998626	0.005926*
	Dkkl1	-3.5917	0.006045*
	Socs1	-1.68546	0.006082*
	Klra1	-1.52918	0.006386*
		-0.993457	0.006394*
	Polr3e	-0.975636	0.006428*
		-3.19113	0.006557*
	Fkbp8	-1.00114	0.006728*
		-4.95579	0.006728*
		-3.15476	0.006771*
	Ifitm2	-3.28969	0.006944*
	Zfp318	-0.754354	0.006958*
	Slc12a3	-4.02828	0.00738*
	Xlr3b	-4.17698	0.007621*
	B4galt5	-1.01815	0.007621*
	Herpud1	-0.931799	0.007621*
	Cish	-1.04061	0.007627*
	Ptpn22	-0.442974	0.007665*
	Tmem110	-1.74128	0.007708*
	Gvin1	-0.521757	0.00771*
	Chrna2	-5.29151	0.007761*
	5830432E09Rik	-1.01341	0.007794*
	Cacfd1	-0.976848	0.007854*
	Txnrd1	-0.590678	0.007964*
	Mrps34	-1.53397	0.008027*
	Dopey2	-0.721552	0.008203*
	Gm17757	-1.11984	0.008239*
	Dtnbp1	-1.22265	0.008239*
	Rbm4b	-0.721779	0.008275*
	A930024E05Rik	-1.82367	0.008373*
	Zfp473	-2.27873	0.008644*
	Abhd16a	-0.729408	0.00868*
	Sp110	-0.388164	0.008706*
		-1.45339	0.008742*
	Pls1	-2.17614	0.008783*
	Srsf7	-0.753756	0.008822*
	Taf11	-1.14766	0.00883*
	Tm9sf1	-0.644587	0.008994*
	Asap2	-0.87865	0.008994*
	Slc16a6	-0.918014	0.009178*
	Ankmy1	-1.83973	0.009473*
	Med10	-0.785804	0.009725*
	Ctsw	-0.672035	0.009867*
	Mettl16	0.875093	0.009453*
	Plcb4	1.66671	0.009178*
	Znrf1	0.729314	0.009137*
	Pecam1	0.757891	0.008288*
	Twsg1	0.989431	0.008239*
	Ncbp1	1.10433	0.00819*
	Spock2	1.68958	0.008098*
	Ccni	0.649517	0.008027*
	4930402H24Rik	1.39173	0.007969*
	Psap	0.647804	0.007966*
		1.13742	0.007903*
	Usp6nl	1.66442	0.0079*
	Kcnn4	0.851946	0.007841*
	Ttc28	0.647924	0.007794*
	Laptm5	0.429624	0.007664*
	Scml4	0.743735	0.00721*
	Fam124b	1.24157	0.006795*
	Ttc17	0.789475	0.006681*
	Usp9x	0.587746	0.006645*
	St8sia1	0.948632	0.006511*
	Ly6e	0.273688	0.006428*
	Mical3	1.90099	0.006049*
	Naa50	0.749118	0.005997*
	Ppm1k	0.794031	0.005766*
		5.64014	0.005599*
	A530021J07Rik	3.70618	0.005482*
	COX1	0.507484	0.005436*
	Maf	0.489062	0.005344*
		1.64911	0.005307*
	Stom	4.23723	0.00529*
	Man2a1	1.14747	0.005219*
	Ctla4	2.69857	0.005219*
	Aff3	1.383	0.005214*
		1.69628	0.005162*
	Lamp1	0.502131	0.005039*
	Cerkl	1.52557	0.004996*
	Aebp2	0.759441	0.004996*
	Camk4	0.612858	0.004904*
	Tuba1b	0.541773	0.004875*
	Smarca5	0.640751	0.004743*
	Tns4	2.62856	0.004698*
	Prpf8	0.447282	0.004653*
	Olfr60	3.67835	0.004647*
	Egr1	0.65124	0.004318*
	Tdrp	2.47628	0.004151*
	Ift74	3.03599	0.003898*
	Angptl2	2.19246	0.003862*
	Akt2	0.622464	0.003799*
	Ralgapb	0.635729	0.003766*
	Nr4a3	1.93666	0.003716*
	Rcc2	0.493751	0.003659*
	Bmpr2	1.34163	0.003653*
	Atl3	0.489334	0.003653*
	Rftn2	1.72263	0.003534*
	Zbtb16	0.645279	0.003366*
	Pcyox1	1.66701	0.003314*
	Ikzf4	2.46311	0.003314*
	Diaph2	0.850532	0.003313*
	Mast4	1.08218	0.003128*
	Dpp4	0.900336	0.003014*
	Cd200	2.31777	0.003*
	Il7r	0.524569	0.002776*
	Ptp4a1	1.12733	0.00266*
	Izumo1r	0.778655	0.002487*
		5.03179	0.002464*
	Spty2d1	1.06301	0.002457*
	Slamf6	0.79517	0.002355*
	Sh3kbp1	0.401146	0.002265*
	Rcn2	0.728066	0.002265*
	1110032F04Rik	3.73421	0.002263*
		0.996207	0.002263*
	Nrip1	0.733166	0.002214*
	St6gal1	0.78768	0.002185*
	Sfmbt2	1.44138	0.002184*
	Setx	0.494655	0.002181*
	Fam78b	2.74168	0.002139*
		1.00987	0.002139*
	Thy1	0.492023	0.002087*
		1.33983	0.002087*
	Sun2	0.487672	0.00196*
	Myo1e	0.905412	0.001821*
	Pdcd4	0.397017	0.00181*
	Strbp	0.912921	0.00181*
	Stab2	2.86823	0.001809*
	Cacna1e	0.677125	0.00169*
	Foxo1	0.516724	0.001594*
	1700040D17Rik	3.89105	0.001571*
	Ccr6	5.95355	0.001514*
	Adam10	0.60395	0.001483*
	Ssbp3	1.03715	0.001483*
	Tnfsf11	1.84456	0.001458*
	Prkx	0.491667	0.001366*
	Acot2	1.0195	0.001175*
	Eftud2	0.858031	0.001065*
	Lrp6	0.625388	0.00099*
	Asap1	1.09174	0.000973*
	Ret	3.51536	0.000906*
	Slfn5	1.02369	0.000896*
	Fam169b	1.19354	0.000888*
	Ppic	2.92344	0.00082*
	Exoc6b	0.873332	0.000797*
	Ephx1	1.03103	0.000776*
	Lrrc8b	1.21028	0.000765*
	Dhcr24	1.75933	0.00072*
	Foxp3	3.56353	0.000635*
	Nbn	1.72531	0.000625*
	Sell	2.71067	0.000617*
		4.06989	0.000615*
	Dtx4	0.914375	0.000576*
	Pes1	0.983943	0.000575*
	Arhgap26	0.623994	0.000507*
	Cysltr1	3.13255	0.000479*
	S100a11	0.735693	0.000371*
	Lrrc8c	0.573326	0.000319*
	Atp6v0d2	2.52387	0.000299*
	Cd83	3.81502	0.000285*
		13.978	0.000208*
	Clint1	0.482457	0.000187*
	Junb	1.57674	0.000187*
	Laptm4b	3.59185	0.000176*
	St3gal1	0.908405	0.000171*
	Pou2f2	1.40884	0.000158*
		1.18395	0.000149*
	Coro2b	1.61669	0.000132*
	Nr1d1	1.745	0.000129*
	Il6st	0.835834	0.000128*
	St8sia6	1.48796	0.000119*
	Rgcc	2.38138	0.000115*
	Ltb4r1	5.07625	0.000115*
	Map2	2.2747	0.000083*
		14.8608	0.000077*
	Cpm	1.87317	0.000073*
	Synpo	4.03881	0.00006*
	Nav2	1.51364	0.00006*
	Cacna1d	1.52766	0.000058*
	Cyth3	1.4429	0.000052*
	Pde5a	2.80042	0.000051*
	Kcnc1	4.68904	0.000033*
		1.00855	0.000032*
	Camk2n1	2.33637	0.000031*
	Igf2r	0.80126	0.00002*
	Jun	2.98174	0.000017*
	Deptor	2.30629	0.000015*
	Kif1b	1.10566	0.000011*
	Klf11	3.84777	0.00001*
	Tmem176b	1.9626	0.000009*
	Poc1b	1.24216	0.000009*
	Il6ra	1.64812	0.000008*
	Tdrkh	2.72475	0.000008*
	Ccr8	3.13544	0.000005*
	Il23r	4.11944	0.000004*
	Nt5e	1.08666	0.000004*
	Gpr83	4.77463	0.000003*
	Rnf144a	1.18662	0.000003*
	Dkk3	6.17381	0.000003*
	Mtss1	2.5081	0.000003*
	Ccr2	0.697388	0.000003*
		0.982505	0.000002*
	Tmem176a	2.25935	0.000002*
	Anp32a	0.724138	0.000001*
	Lmo4	1.13443	0.000001*
	Rora	1.01449	0.000001*
	Ctss	0.943112	0.000001*
	Plxnd1	3.04227	0.000001*
	Adam12	1.96937	4.43967e-007*
	Ccr7	2.05101	3.68743e-007*
	Tbl1x	0.963201	3.61465e-007*
	Dusp1	2.01186	3.32715e-007*
	Il17re	3.09842	3.32715e-007*
	Ccr4	1.18619	1.78933e-007*
	Sema4b	1.50196	1.47871e-007*
	Fam129a	0.778074	7.76199e-008*
	Gpr183	1.19033	7.623e-008*
	Fos	5.53738	7.21026e-008*
	Igfbp4	1.68876	2.99724e-008*
	Xkrx	1.97582	2.82917e-008*
	Icos	0.919308	2.24576e-008*
	Rorc	2.66607	1.93089e-008*
	Fosb	4.90018	1.24401e-008*
	Mturn	1.70419	1.24401e-008*
	Nsg2	1.69866	1.24401e-008*
	Nrp1	1.51569	1.07205e-008*
	Gm2a	1.05766	7.61049e-009*
	Tgfbr3	1.59002	3.95751e-009*
	Chdh	1.18398	3.693e-009*
		0.963499	2.78016e-009*
	Phactr2	1.24026	2.64029e-009*
	Epas1	1.52317	1.02391e-009*
	Nr4a1	3.15393	8.78268e-010*
	Themis	1.58015	4.85923e-010*
	Cd96	0.778342	3.34695e-010*
	Emb	1.63356	1.74158e-010*
	S1pr1	1.19925	1.65214e-010*
	Pxdc1	3.69558	7.50069e-011*
	Ifngr2	3.50324	6.17793e-011*
	Mmp25	3.62258	5.52945e-011*
	Serpinb1a	3.52548	5.2494e-011*
	Sdc1	3.59714	8.78376e-012*
	Lingo4	3.42109	8.36408e-012*
	Irak3	3.34791	1.05062e-012*
	Gucy1a3	6.3723	7.04974e-013*
	Selenop	1.82743	4.96781e-013*
		0.927923	1.31322e-014*
	Fam83a	3.56187	3.12236e-015*
	Il1r1	3.14138	2.0752e-016*
	Itga4	1.5916	6.54375e-017*
	Tcf7	1.45728	5.60354e-019*
		1.05504	1.93308e-019*
	Il2ra	1.99206	3.44854e-025*
	Igf1r	3.3398	1.5257e-030*

## Sheet: B
	Figure 3- figure supplement 1B
	Functional enrichment analysis of genes as indicated:
	Upregulated in LN iNKT cells (vs spleen/thymus)						Upregulated in spleen/thymus iNKT cells (vs LN)
	Go term			p			Go term			p
	cellular response to organic substance			1.71e-05			positive regulation of lymphocyte mediated immunity			0.000417
	positive regulation of T cell activation			0.000135			positive regulation of leukocyte mediated cytotoxicity			0.036
	positive regulation of cell population proliferation			0.00144			positive regulation of defense response			0.0385
	T cell differentiation			0.00226			leukocyte activation			0.0392
	positive regulation of nucleic acid-templated transcription			0.00366			regulation of innate immune response			0.0468
	negative regulation of cellular process			0.00473
	positive regulation of chemotaxis			0.005
	response to cytokine			0.00502
	response to lipid			0.00872
	enzyme linked receptor protein signaling pathway			0.0113
	tube morphogenesis			0.0118
	inflammatory response			0.0153
	regulation of apoptotic process			0.0167

## Sheet: C
		Figure 3- figure supplement 1C
		Frequency of Vb7+ or Vb8+ cells within EdU+ or EdU- iNKT cells
			Vb7+		Vb8+
			EdU-	EdU+	EdU-	EdU+
		iLN	7.63	8.33	48.1	58.3
		iLN	9.75	15.8	49.5	42.1
		iLN	6.7	23	51.8	47
		iLN	5.2	8.8	55.8	54.5
		mLN	15	16.7	44.8	42.9
		mLN	14.2	21	47.7	38.9
		mLN	12.7	13.5	50	34.6
