# Supplementary material for: Tissue-specific shaping of the TCR repertoire and antigen specificity of iNKT cells
Source: eLife. 2019 Dec 16;8:e51663. doi: 10.7554/eLife.51663 (PMC6930077; doi:10.7554/eLife.51663)
Supplement: Figure 3—source data 1. [file elife-51663-fig3-data1.xlsx]

## Sheet: Fig3B
	Figure 3B
	Fold change (log2) of selected transcripts in iNKT cells from the indicated tissues (compared to splenic iNKT cells)
		Spleen	Thymus	mLN	iLN
	Caml	0	0	-2.21344	-2.32341
	Cd22	0	0	-4.6344	0
	Cd226	0	1.39874	0	-1.22365
	Cd28	0	0	0.794606	0
	Cdk6	0	0	0	1.48331
	Dok2	0	0	-0.968304	-1.36414
	Egr1	0	-0.954594	1.14034	1.11674
	Egr3	0	-2.3488	2.2476	0
	Fos	0	0	4.8485	6.13305
	Fosb	0	0	3.48787	4.03199
	Gpr183	0	-1.27662	1.3756	2.28169
	Icos	0	0	0	1.73764
	Nr4a1	0	0	2.60668	3.01795
	Ptpn22	0	0	0	-0.811193
	Rorc	0	0	0	4.19379
	Tcf7	0	0	1.40621	1.53429
	Tox	0	-1.68194	1.4601	1.16256
	Treml2	0	-1.6094	2.39251	0
	Ccl5	0	2.66073	-1.41618	-2.5373
	Ccr2	0	1.63862	-0.682694	0
	Ccr4	0	0	1.41183	1.46818
	Ccr5	0	2.87694	-1.61415	-3.10219
	Ccr8	0	-8.54265	6.35562	8.45791
	Ccr9	0	2.33735	0.954173	-2.26794
	Il12rb2	0	0	-1.08092	-0.949338
	Il18r1	0	-0.661425	0	1.2414
	Il18rap	0	0	-1.58067	-0.912567
	Il1r1	0	2.56848	0	4.99049
	Klrb1c	0	0	-0.969155	-0.949421
	Klrc1	0	0	-2.36014	-1.50504
	Klrd1	0	-2.1195	-1.53144	-2.35263
	Klrk1	0	-1.40102	-1.66843	0
	Gzma	0	-2.47254	-3.40848	-5.41235

## Sheet: Fig3E
		Figure 3E
		Ki-67MFI for iNKT cells normalised to Ki-67 MFI from T cells in the same tissues
		thymus	spleen	mln	iln
		1.09	1.71	1.76	3.55
		0.89	1.63	2.28	2.44
		1.03	1.56	2.05	3.71
		0.88	1.64	2.37	3.85
		0.85	1.67	1.95	4.9

## Sheet: Fig3F
		Figure 3F
		Frequency of EdU+ iNKT cells
		thymus	spleen	mln	iln
		2.05	1.37	5.84	4.23
		1.88	1.85	3.15	3.64
		1.8	0.92	3.75	4
		1.84	0.87	2.22	3.8
		0.6	0.71	3.45	2.58
		0.82	1.53	1.87	3.99

## Sheet: Fig3H
		Figure 3H
		Frequency of TRBV usage for CDR3b sequences present once (1) or 2 or more times (2+) in our data set
			TRBV1	TRBV12-2	TRBV13-1	TRBV13-2	TRBV13-3	TRBV15	TRBV17	TRBV19	TRBV20	TRBV29	TRBV31	TRBV4	TRBV5
		mln-1	13.8743	0	16.7539	31.6754	12.0419	0.26178	0.52356	1.04712	0.26178	17.2775	1.3089	1.3089	1.83246
		mln-2+	14.7453	0	12.8686	27.6139	12.8686	0.80429	1.87668	1.60858	0.536193	21.7158	1.07239	0.536193	2.41287
		iln-1	15.8621	0	14.4828	34.4828	9.65517	0.689655	1.37931	0.689655	1.37931	13.1034	0.689655	1.37931	2.75862
		iln-2+	18.3099	0	12.6761	29.108	11.2676	0.469484	1.40845	0	0.469484	19.7183	1.40845	1.40845	2.34742
