# Supplementary material for: Tissue-specific shaping of the TCR repertoire and antigen specificity of iNKT cells
Source: eLife. 2019 Dec 16;8:e51663. doi: 10.7554/eLife.51663 (PMC6930077; doi:10.7554/eLife.51663)
Supplement: Figure 4—figure supplement 1—source data 1. [file elife-51663-fig4-figsupp1-data1.xlsx]

## Sheet: Fig4-sup1
		Figure 4- figure supplement 1
		Frequency of CD4/NK1.1-expressing iNKT cells
			CD4+NK1.1-					NK1.1+CD4-					CD4+NK1.1+					CD4-NK1.1-
		Thymus	14.2	14.2	13.2	16.8	12	32.9	36.5	33.9	34.5	31.6	49.7	46.4	50.9	46.1	54.5	3.18	2.99	2	2.6	1.8
		Spleen	35	32.9	31.1	42.1	36	7.8	10.6	11.1	8.4	7.9	53.6	53.2	55	46	53.2	3.55	3.4	2.8	3.5	2.9
		mLN	50.3	52.7	45.8	48.1	53.7	7.5	8.4	9.1	9.4	6.4	38.5	33.4	39.7	38	35.5	3.7	5.5	5.4	4.5	5.3
		iLN	43.5	43.1	44.9	46.5	45.4	10.2	11.4	10.5	11.7	10.6	16	18.8	23.3	19.6	24.2	30.3	26.7	21.3	22.2	19.9
		Frequency of Vb7+ iNKT cells
			CD4+NK1.1-				NK1.1+CD4-				CD4+NK1.1+				CD4-NK1.1-
			Thymus	Spleen	mLN	iLN	Thymus	Spleen	mLN	iLN	Thymus	Spleen	mLN	iLN	Thymus	Spleen	mLN	iLN
			24.7	13	16.5	18.2	12.9	7.6	11.3	13	10.9	8.95	15.6	16.3	31.3	5.99	6.4	6.9
			25	12.5	16	20	10.4	7.6	8	11.8	11.5	10.9	14	16.1	6.93	4.06	10.7	7.8
			21.9	11	15.9	19.7	6.3	4.5	14.7	13.7	8.7	7.9	13.3	17.1	7.7	5	11.7	11.2
			24.1	11.5	17.6	18.3	7	6.2	10.7	8.1	9.2	9.6	12.3	15.1	10.2	5.7	2.9	5.8
			25.8	11.1	15.4	20.2	6.6	7.3	11.4	11.2	8.5	9.2	14	18.8	11	4.4	11.1	6.3
		Frequency of Vb8+ iNKT cells
			CD4+NK1.1-				NK1.1+CD4-				CD4+NK1.1+				CD4-NK1.1-
			Thymus	Spleen	mLN	iLN	Thymus	Spleen	mLN	iLN	Thymus	Spleen	mLN	iLN	Thymus	Spleen	mLN	iLN
			53.6	56.4	50.1	50.8	59.9	62	49.1	47.4	63.2	67.5	59.3	57.5	44.3	49.7	54.7	62
			49.1	55.5	48.9	47.7	64.8	61.1	52.2	52.5	63.4	64.2	57.1	61	52.8	57.2	46.3	55.5
			47.2	59.8	51.4	52.2	66.8	67.6	56.9	61.7	65	67.7	61	57.9	38.5	50.8	50.4	57.8
			48.8	59.1	49.4	52.9	67.3	65.8	60	60.3	65.8	68	62.1	59.5	49.2	59.7	66	57.4
			47.2	59.9	50	48.1	64.6	62.3	52.8	51.7	65.4	65.8	57.5	54.5	50	58.7	52.2	57
