# Supplementary material for: Tissue-specific shaping of the TCR repertoire and antigen specificity of iNKT cells
Source: eLife. 2019 Dec 16;8:e51663. doi: 10.7554/eLife.51663 (PMC6930077; doi:10.7554/eLife.51663)
Supplement: Figure 4—source data 1. [file elife-51663-fig4-data1.xlsx]

## Sheet: Fig4A
	Figure 4A
	Frequency of NKT1, NKT2 and NKT17 amongs iNKT cells in the depicted tissues of WT mice
		NKT17										NKT1										NKT2
	thymus	0.6	1	0.8	0.5	0.47	0.71	0.66	1.35	2.5	2.61	95.1	94.3	93.7	92.2	95.8	94.9	93.9	93.2	89.8	88	3.8	4.4	4.3	5.2	3.08	3.75	4.68	4.66	6.21	7.78
	spleen	1.4	1.9	1	1.4	1.57	1.17	1.58	2.23	1.84	2.01	91.6	92.7	91.6	88.3	94.1	92.6	93.2	92.8	91.5	89.9	5.9	4.4	5.1	7.6	3.63	4.69	4.01	3.37	5.6	6.77
	mLN	7.9	6.4	9.9	7	8.45	7.23	6.03	8.44	3.57	3.26	58.9	63.2	70.3	60.6	60.6	66.3	68.5	65.9	70.7	56.2	31.6	27.7	28.6	22.2	27	22.6	21.1	20.8	22.1	37.9
	iLN	32.7	41.3	40.2	32.6	31.4	26.2	34.7	35	28.5	27.8	44.7	44.5	47.7	48.7	44.6	41.9	42.4	41.9	56.9	58	18.9	11.8	10.9	16.4	16	28.2	19.4	19.7	13.5	13.3

## Sheet: Fig4C
		Figure 4C
		Frequency of TCRVb7+ or Vb8+ in NKT1, NKT2 or NKT17 cells
		NKT1 cells
		Vb7+				Vb8+
		thymus	spleen	mln	iln	thymus	spleen	mln	iln
		9.4	8.5	13.3	8.7	63.8	62.3	53.6	52.9
		8.5	9.9	11.2	9.6	63.6	61.5	50.5	46.2
		9.1	8.2	14.7	8.6	65.1	61.7	50.3	54.5
		10.3	9.4	13	11.7	64	61.5	50.6	55.2
		16.7	14.4	20	16.2	54.1	54.8	48.9	52.5
		12	13.4	14.4	17.2	63.9	57.1	54.6	55.8
		19.5	14.1	16.5	16.8	52.8	54.7	50.3	55.7
		16.8	15.6	17.9	14.7	53.7	53.4	46.3	51.9
		10.3	12.8	12.7	7.43	60.4	59.7	49.1	60.8
		10.1	12.5	12	16.3	62.4	59.9	50.6	50.5
		NKT2 cells
		Vb7+				Vb8+
		thymus	spleen	mln	iln	thymus	spleen	mln	iln
		30.3	19.4	19.8	26.6	50	57	51.6	44.3
		24.5	18.5	12.3	18.4	45	46	51.5	59.2
		29.9	17.9	22.5	30.9	58.2	53.1	49.4	40.4
		19.1	14.4	22.5	28.8	48.4	53	47.4	44.1
		30.2	18.7	19.8	26.6	43	56	49.4	53.1
		21.9	19.1	20.1	19.5	54.3	50	53.1	62.4
		22	18.6	23.2	24.5	53.5	54.3	48.9	46.9
		27.7	27.3	16.3	27.7	41.8	46.8	51.6	47.5
		26.4	26.7	17.6	28.6	49.8	46.2	55.9	54.3
		24.1	24.2	22	31.1	46.8	49.3	50.1	48.9
		NKT17 cells
		Vb7+				Vb8+
		thymus	spleen	mln	iln	thymus	spleen	mln	iln
		13.1	11	7.4	5.8	55.8	43.5	62.7	64.8
		6.1	11	2.4	3.6	54.2	53	58.5	69.1
		10.3	9.1	6.9	6.2	67.3	48.8	63.2	58.6
		9.6	10.9	4.2	3.4	48.7	46.6	67.6	64.7
		8.3	5.8	4.8	4.2	58.3	61.5	56.5	64.1
		12	11.4	6.7	5.8	48	57	62.2	57.4
		6.7	3.3	8.9	3.2	70	68.5	60	59.6
		10	10.9	7.1	12.3	60	56.2	53.1	44.4
		7.9	4.1	8.1	7.8	65.8	55.1	62.5	61.9
		10	8.9	5.7	8.1	56.7	42.2	48.4	59.8
