# Supplementary material for: Tissue-specific shaping of the TCR repertoire and antigen specificity of iNKT cells
Source: eLife. 2019 Dec 16;8:e51663. doi: 10.7554/eLife.51663 (PMC6930077; doi:10.7554/eLife.51663)
Supplement: Figure 5—figure supplement 1—source data 1. [file elife-51663-fig5-figsupp1-data1.xlsx]

## Sheet: Fig5-Sup1
	Figure 5 -figure supplement 1
	Frequency of aGlcCer- iNKT cells
	liver	lung	SI-LP
	6.42	8.41	16.7
	5.72	8	18.9
	6.07	5.44	12.2
	5.87	14.9	9.2
	Frequency of OCH- iNKT cells
	liver	lung	SI-LP
	13.7	13.6	24.8
	14.2	14.1	26.4
	14.8	21.8	39.3
	13.5	16.8	32.8
