# Supplementary material for: Tissue-specific shaping of the TCR repertoire and antigen specificity of iNKT cells
Source: eLife. 2019 Dec 16;8:e51663. doi: 10.7554/eLife.51663 (PMC6930077; doi:10.7554/eLife.51663)
Supplement: Figure 5—source data 1. [file elife-51663-fig5-data1.xlsx]

## Sheet: Fig5B
		Figure 5B
		Frequency of aGlcCer- iNKT cells
		thymus	spleen	mLN	iLN
		6.25	5.28	12.1	14.8
		6.52	4.51	11.7	14.7
		7.71	5.24	18.2	17.3
		8.7	7.6	12.6	13.8
		8.8	4.8	13.4	19.2
		8.6	5.8	13.4	16.4
		Frequency of OCH- iNKT cells
		thymus	spleen	mLN	iLN
		12.3	15.5	17.4	14.1
		15.4	13.6	18.1	11.6
		15.3	19.3	23.5	17.4
		16.3	17.9	22.7	24.4
		18.1	19.9	23.1	20.7
		29.4	25.4	43.1	36
		24.9	25.1	37.8	38.9
		26.4	24.8	32.9	37.2

## Sheet: Fig5E
		Figure 5E
		Frequency of Vb7+ iNKT cells in mice from 2, 6 and 11 weeks of age
		Thymus			Spleen			mLN			iLN
		2 weeks	6 weeks	11 weeks	2 weeks	6 weeks	11 weeks	2 weeks	6 weeks	11 weeks	2 weeks	6 weeks	11 weeks
		22	15.3	18.5	18.4	14.9	14.3	22.8	17.7	14.3	22	14.7	12.8
		28.7	17.7	17.8	18.8	16.6	13.1	18.4	19	12.7	26.7	17.3	12.6
		25.5	16.1	18.6	17.6	15.6	13.6	19.9	15.6	17.4	22.5	16.5	11.8
		21.3	18.1	14.8	16.4	16.6	12.5	17.6	16.6	10.2	17.3	19.2	11.9
		17.6	18.1	13.3	15.5	16.3	11.2	14.2	16.8	9.75	17.9	18.3	6.8
		26	17.7	15.7	17.7	17.9	13.5	15.9	18.7	9.12	22	18.9	7.29
		16.4	19.3	15.9	20.5	17.7	13.2	20.5	21.9	17.2	23.3	19.1	16.9
		17.1	17	16.3	9.14	16.5	13.4	15.6	17.7	18.9	15.6	16.1	11.7
		20.3	18.6	16.2	6.66	14.8	14	17.5	19.5	16.7	18.4	19.8	12.3
		22.4	17	14.3	9.5	15	14	19.2	17.2	14.7	15.5	18.8	13.5
			18.9	13.9	18.5	16.2	13.4		21.4	11.2	20.6	17.7	12.2
			11.8	13.4		14.3	12.9		16.2	14.4		14.5	13.3
			14.7	14.1		14.8	13.9		16.5	21.2		14.6	15.1
			15.3	16.1		14	14.1		14.6	17.4		15.2	9.09
			15.4	16.4		14	13.8		18.3	16.3		19.5	9.76
			18.5			13.4			14.8			19.4
			13.7			12.6			17.6			19.2
			18.1			13.8			17.3			19
			9.44			11.4			12.9			14.6
			8.11			9.09			15.6			12.6
		Frequency of Vb8+ iNKT cells in mice from 2, 6 and 11 weeks of age
		Thymus			Spleen			mLN			iLN
		2 weeks	6 weeks	11 weeks	2 weeks	6 weeks	11 weeks	2 weeks	6 weeks	11 weeks	2 weeks	6 weeks	11 weeks
		59.2	56	53.7	53.5	54.8	54.9	55.3	47	41.3	58.8	49.5	47
		47.1	53.7	52.7	53.3	55.4	56	52.7	48.6	38.8	50.5	48.7	40.4
		50	53.5	51.9	58.2	54.5	54.9	54.6	47.3	40.7	46.7	47.8	42.7
		52.9	57.9	57.9	59.8	57.7	56.3	56.7	56.4	38	55.7	56.1	34.4
		45.7	57.3	56.7	58.2	58.4	57	59.9	54.4	36	56.7	53.4	34.4
		46.9	56.4	55.6	52.1	56.3	55.8	54.6	52	27.2	48.2	57.9	34.1
		54.1	54.3	55.5	54.9	54	55.2	52.8	47.9	46.9	47.7	49.9	44.8
		53.8	52.6	54.7	62.8	52.7	56.5	51.2	45.3	45.6	53.2	48.1	51.4
		52.7	48.4	51.4	63.7	52.8	56	55.2	48.9	47.6	54	51	45.9
		48.4	49.4	54.4	64.2	53.1	55.4	53	53.1	43.5	55.6	58.1	51.4
			49.2	52.8	53.5	51.8	53		47.1	47.2	54.2	51.6	44
			55.4	56.9		56.7	56.6		43.2	47.1		44.4	45.2
			55.6	54.3		56.3	57.7		45.3	42.7		49.7	52.9
			53.6	58		56.6	57.9		44.6	48.2		49.1	55.5
			61.4	57.4		60.3	56.8		54	40.2		56.3	57.3
			61.9			61.9			56.7			57.6
			60.9			61			54.7			57.1
			56.7			60.3			48			58
			63.7			62.7			55.8			57.2
			67.5			66.6			56			56.8
		Frequency of Vbother+ iNKT cells in mice from 2, 6 and 11 weeks of age
		Thymus			Spleen			mLN			iLN
		2 weeks	6 weeks	11 weeks	2 weeks	6 weeks	11 weeks	2 weeks	6 weeks	11 weeks	2 weeks	6 weeks	11 weeks
		18.8	28.7	27.8	19.2	35.8	40.2	21.9	35.3	44.4	28.1	30.3	30.8
		24.2	28.6	29.5	22.8	34	47	28.9	32.4	48.5	27.9	28	30.9
		24.5	30.4	29.5	30.8	35.7	45.5	25.5	37.1	41.9	24.2	29.9	31.5
		25.8	24	27.3	27	24.7	53.7	25.7	27	51.8	23.8	25.7	31.2
		36.7	24.6	30	25.4	28.3	58.8	25.9	28.8	54.25	26.3	25.3	31.8
		27.1	25.9	28.7	29.8	23.2	58.61	29.5	29.3	63.68	30.2	25.8	30.7
		29.5	26.4	28.6	29	31	38.3	26.7	30.2	35.9	24.6	28.3	31.6
		29.1	30.4	29	31.2	35.8	36.9	33.2	37	35.5	28.06	30.8	30.1
		27	33	32.4	27.6	29.2	41.8	27.3	31.6	35.7	29.64	32.4	30
		29.2	33.6	31.3	28.9	23.1	35.1	27.8	29.7	41.8	26.3	31.9	30.6
			31.9	33.3	25.2	30.7	43.8		31.5	41.6	28	32	33.6
			32.8	29.7		41.1	41.5		40.6	38.5		29	30.5
			29.7	31.6		35.7	32		38.2	36.1		28.9	28.4
			31.1	25.9		35.7	35.41		40.8	34.4		29.4	28
			23.2	26.2		24.2	32.94		27.7	43.5		25.7	29.4
			19.6			23			28.5			24.7
			25.4			23.7			27.7			26.4
			25.2			23			34.7			25.9
			26.86			28.2			31.3			25.9
			24.39			30.6			28.4			24.31

## Sheet: Fig5F
	Figure 5F
	Frequency of aGlcCer- iNKT cells in mice of 2 or 11 weeks of age
	Thymus		Spleen		mLN		iLN
	2 weeks	11 weeks	2 weeks	11 weeks	2 weeks	11 weeks	2 weeks	11 weeks
	9.55	4.02	2.96	3.54	3.84	16	9.9	15.6
	4.16	3.74	3.52	3.5	6.02	14	11.8	18.4
	3.81	5.61	2.08	1.18	4.73	8.38	7.12	17.8
