# Supplementary material for: Tissue-specific shaping of the TCR repertoire and antigen specificity of iNKT cells
Source: eLife. 2019 Dec 16;8:e51663. doi: 10.7554/eLife.51663 (PMC6930077; doi:10.7554/eLife.51663)
Supplement: Figure 6—figure supplement 1—source data 1. [file elife-51663-fig6-figsupp1-data1.xlsx]

## Sheet: 1B
	Figure 6- figure supplement 1B
	MFI for Ki-67 in iNKT cells normalised to T cells
	Spleen		mLN		iLN
	PBS	aGalCer-3days	PBS	aGalCer-3days	PBS	aGalCer-3days
	3.6	23.5	7.02	29.99	8.13	27.3
	3	29.5	8.59	35.31	6.68	30.5
	2.7	29.8	4.94	26.66	5.21	28.2

## Sheet: 1C
	Figure 6- figure supplement 1C
	Frequency of iNKT cells after administration of aGalCer or PBS
	Spleen		mLN		iLN
	PBS	aGalCer-3days	PBS	aGalCer-3days	PBS	aGalCer-3days
	0.94	16.9	0.21	5.3	0.25	5.6
	0.99	19.5	0.38	3.8	0.2	2.4
	1.67	14.6	0.2	2.9	0.18	2.4

## Sheet: 1D
	Figure 6- figure supplement 1D
	Frequency of Vb7+, Vb8+ or Vbother+ iNKT cells after administration of aGalCer or PBS
	Frequency of Vb7+ iNKT cells
	Spleen		mLN		iLN
	PBS	aGalCer-3days	PBS	aGalCer-3days	PBS	aGalCer-3days
	8.7	9.79	8.3	11.8	14.1	10.4
	8.7	10.2	14.8	10.8	10.3	10.7
	10	10.2	13.6	11.4	14	16.3
	Frequency of Vb8+ iNKT cells
	Spleen		mLN		iLN
	PBS	aGalCer-3days	PBS	aGalCer-3days	PBS	aGalCer-3days
	56.8	65.6	50.8	62	62.8	63.5
	59.3	64.3	55.1	62.8	53.7	62.1
	59	64.9	47.6	60.9	56.6	61.8
	Frequency of Vbother+ iNKT cells
	Spleen		mLN		iLN
	PBS	aGalCer-3days	PBS	aGalCer-3days	PBS	aGalCer-3days
	29.1	24.4	34.7	27.4	25	23.8
	30	24.8	32	26.3	31	25.4
	27.8	24.2	36.1	26.9	27.2	24.9
