# Supplementary material for: Tissue-specific shaping of the TCR repertoire and antigen specificity of iNKT cells
Source: eLife. 2019 Dec 16;8:e51663. doi: 10.7554/eLife.51663 (PMC6930077; doi:10.7554/eLife.51663)
Supplement: Figure 6—figure supplement 2—source data 1. [file elife-51663-fig6-figsupp2-data1.xlsx]

## Sheet: Sheet1
	Figure 6 -figure supplement 2
	In vitro: Frequency of cytokine+ iNKT cells within the Vb+ populations (after stimulation with aGalCer in vitro)
	IFN-g+ iNKT				IL-4+ iNKT
	Vb7+	Vb8+	Vbother+		Vb7+	Vb8+	Vbother+
	3.97	8.15	9		4.6	7.15	9.1
	14.2	23	24.1		6.8	14.4	14
	4.1	11.4	10.9		7.9	12.3	12.5
	14	34.4	29.3		12.9	27.8	23.6
	13.3	25.5	23.9		8.3	18.3	17
	3.9	7.7	9.8		3.9	8.5	10.3
	6.1	11.3	13.1		6.6	14.6	16.1
	In vivo: Frequency of cytokine+ iNKT cells within the Vb+ populations (after stimulation with aGalCer in vivo)
	IFN-g+ iNKT				IL-4+ iNKT
	Vb7+	Vb8+	Vbother+		Vb7+	Vb8+	Vbother+
	46.5	65.6	71.2		53.7	70.4	73.6
	41.6	62.5	63.8		48.5	66.9	68.7
	39.2	55.3	58.9		51.5	66.6	68.9
	43.6	62.5	64.7		54.9	69.7	69.6
