# Supplementary material for: Tissue-specific shaping of the TCR repertoire and antigen specificity of iNKT cells
Source: eLife. 2019 Dec 16;8:e51663. doi: 10.7554/eLife.51663 (PMC6930077; doi:10.7554/eLife.51663)
Supplement: Figure 6—figure supplement 3—source data 1. [file elife-51663-fig6-figsupp3-data1.xlsx]

## Sheet: Sheet1
		Figure 6- figure supplement 3
		Frequency of iNKT cells after administration of antibiotics (Ab)
		Thymus		Spleen		mLN		iLN
		Ab	Control	Ab	Control	Ab	Control	Ab	Control
		3.52	3.79	4.18	4.84	0.41	0.21	0.16	0.19
		3.4	4.09	3.62	4.43	0.17	0.16	0.31	0.15
		3.9	4.62	2.91	3.61	0.24	0.19	0.49	0.13
		6.02	3.83	2.74	3.21	0.27	0.22	0.17	0.22
		3.92	5.34	2.8	3.9	0.23	0.23	0.25	0.33
		3.47	3.08	2.28	3.1	0.32	0.14	0.42	0.2
		3.4	4.48	2.51	3.87	0.3	0.3	0.35	0.2
		3.29	5.51	1.89	3.12	0.26	0.24	0.31	0.22
		4.99	6.8	3.98	2.96	0.28	0.26	0.37	0.18
		4.55	3.92	3.59	2.93	0.26	0.23	0.38	0.26
