# Supplementary material for: Tissue-specific shaping of the TCR repertoire and antigen specificity of iNKT cells
Source: eLife. 2019 Dec 16;8:e51663. doi: 10.7554/eLife.51663 (PMC6930077; doi:10.7554/eLife.51663)
Supplement: Figure 6—source data 1. [file elife-51663-fig6-data1.xlsx]

## Sheet: Fig6B
	Figure 6B
	MFI for Ki-67 in iNKT cells normalised to T cells
	Spleen			mLN			iLN
	PBS	OCH-3days	OCH-10 days	PBS	OCH-3days	OCH-10 days	PBS	OCH-3days	OCH-10 days
	1.1	30.9	7.1	1.93	32.7	3.53	4.78	21.8	5.07
	2.26	33.4	8.3	1.66	19.89	3.66	3.42	26	5.16
	3.88	26.12	6.17	2.44	32.96	2.99	3.5	27.1	5.23
	1.4	25		2.24	18.3		5.75	17.8
		29			24.9			19.1

## Sheet: Fig6C
	Figure 6C
	Frequency of iNKT cells after administration of OCH or PBS
	Spleen			mLN			iLN
	PBS	OCH-3days	OCH-10 days	PBS	OCH-3days	OCH-10 days	PBS	OCH-3days	OCH-10 days
	1.18	3.36	0.92	0.25	0.61	0.39	0.31	0.52	0.35
	1.27	5.9	0.93	0.2	1.99	0.42	0.24	0.32	0.34
	1.28	2.23	1.19	0.2	1.75	0.43	0.27	0.43	0.46
	1.61	2.63		0.21	0.63		0.17	0.46
		2.88			1.3			0.48

## Sheet: Fig6D
	Figure 6C
	Frequency of Vb7+ or Vb8+ iNKT cells after administration of OCH or PBS
	Frequency of Vb7+ iNKT cells
	Spleen			mLN			iLN
	PBS	OCH-3days	OCH-10 days	PBS	OCH-3days	OCH-10 days	PBS	OCH-3days	OCH-10 days
	12.3	7.49	5.77	16.1	4.73	9.09	13.6	7.21	10.3
	14	7.59	10.9	18.7	7.42	11.7	13.5	10.3	9.71
	17.5	9.93	9.13	22.2	5.7	10.3	20.5	12.8	8.07
	9.68	5.45		17.8	8.4		14.3	10.2
		5.42			6.3			9.2
	Frequency of Vb8+ iNKT cells
	Spleen			mLN			iLN
	PBS	OCH-3days	OCH-10 days	PBS	OCH-3days	OCH-10 days	PBS	OCH-3days	OCH-10 days
	63	67.9	63.8	57.6	80.6	68.8	61.2	70.5	68.2
	60.7	77.6	64.7	53.2	71.4	61	57.9	72.5	68.3
	56.4	65	68	52.1	76.8	66.9	51.1	72.3	71.8
	61	69.5		48.8	68		58.1	64.1
		68.6			70			65.2

## Sheet: Fig6E
	Figure 6E
	Frequency of Vb7+ or Vb8+ iNKT cells after administration of antibiotics
	Frequency of Vb7+ iNKT cells
	Thymus		Spleen		mLN		iLN
	Ab	Control	Ab	Control	Ab	Control	Ab	Control
	17.4	15.9	15.3	13.2	20	17.2	12.5	16.9
	17.1	16.3	13.2	13.4	15.7	18.9	12.4	11.7
	16.6	16.2	14.3	14	15.1	16.7	11.4	12.3
	17.4	14.3	12.7	14	17.9	14.7	16.6	13.5
	14.3	13.9	14.3	13.4	19.7	11.2	13	12.2
	16.9	13.4	13	12.9	16.5	14.4	12.5	13.3
	14.3	14.1	12.8	13.9	18.3	21.2	12.8	15.1
	14	16.1	14.1	14.1	17.5	17.4	7.99	9.09
	16.1	16.4	13.4	13.8	18.2	16.3	9.69	9.76
	16.8	18.5	19.1	14.3	19.1	14.3	12.4	12.8
	Frequency of Vb8+ iNKT cells
	Thymus		Spleen		mLN		iLN
	Ab	Control	Ab	Control	Ab	Control	Ab	Control
	55.1	55.5	54.5	55.2	50.4	46.9	51.4	44.8
	52.3	54.7	55.3	56.5	51.6	45.6	47.9	51.4
	54.5	51.4	54.7	56	53.3	47.6	58.5	45.9
	60.1	54.4	58.7	55.4	51.3	43.5	46.2	44.5
	60.6	52.8	58.1	53	45.6	47.2	48.1	44
	55.8	56.9	56.7	56.6	49.7	47.1	52.4	45.2
	55.3	54.3	55.9	57.7	50	42.7	53.1	52.9
	56.1	58	55.9	57.9	45.6	48.2	55.9	55.5
	53.8	57.4	55.8	56.8	49.8	40.2	61.1	57.3
	53.2	53.7	51.5	54.9	46.5	41.3	54.4	47

## Sheet: Fig 6F
	Figure 6F
	Frequency of Vb7+ or Vb8+ iNKT cells in GF or SPF mice
	Frequency of Vb7+ iNKT cells
	Thymus		Spleen		mLN		iLN
	GF	SPF	GF	SPF	GF	SPF	GF	SPF
	16.1	15.3	16.1	14.9	16.1	17.7	16	14.7
	15.8	17.7	15.2	16.6	25.1	19	15.5	17.3
	16.6	16.1	16.4	15.6	19.2	15.6	14.9	16.5
	20	18.1	14.9	16.6	18	16.6	23.3	19.2
	14.9	18.1	17.9	16.3	16.9	16.8	17.2	18.3
	17.4	17.7	16.4	17.9	20.7	18.7	15.8	18.9
	Frequency of Vb8+ iNKT cells
	Thymus		Spleen		mLN		iLN
	GF	SPF	GF	SPF	GF	SPF	GF	SPF
	57	56	53.5	54.8	48.2	47	56.9	49.5
	56.1	53.7	55.3	55.4	41.6	48.6	50.5	48.7
	57.6	53.5	55.8	54.5	43.6	47.3	53.4	47.8
	56.3	57.9	57.5	57.7	46	56.4	43.3	56.1
	53.5	57.3	53.7	58.4	50.7	54.4	37.6	53.4
	53.7	56.4	54.2	56.3	45	52	37.1	57.9
