# Supplementary material for: Tissue-specific shaping of the TCR repertoire and antigen specificity of iNKT cells
Source: eLife. 2019 Dec 16;8:e51663. doi: 10.7554/eLife.51663 (PMC6930077; doi:10.7554/eLife.51663)
Supplement: Figure 7—source data 1. [file elife-51663-fig7-data1.xlsx]

## Sheet: Fig7A
		Figure 7A
		Frequency of iNKT cells in human blood and tonsils
		blood	tonsil
		0.11	0.013
		0.057	0.018
		0.19	0.019
		0.43	0.019
		0.16	0.032
		0.17	0.013
		0.005	0.015
		0.006	0.007
		0.032	0.018
		0.021	0.0015
		0.016	0.012

## Sheet: Fig7B
		Figure 7B
		Frequency of CD4+, CD8+ or DN iNKT cells in human blood and tonsils
		CD4+		CD8+		DN
		blood	tonsil	blood	tonsil	blood	tonsil
		56.1	77.4	16.6	6.71	27	14.6
		28.8	69.1	23.9	5.83	46.6	22.9
		20	71.1	41.5	10.4	35	17.2
		83	64.7	10.5	19.1	4.26	14.5
		23.3	82.6	39.3	6.85	36	8.68
		63.9		5.38		29.3
		52		18.7		27.7

## Sheet: Fig7C
		Figure 7C
		Frequency of CD69+ or CD25+ iNKT cells in human blood and tonsils
		CD69+		CD25+
		blood	tonsil	blood	tonsil
		14.6	19.1	0.68	6.61
		42.2	49.1	13.3	6.5
		42.1	53.2	7.89	7.59
		15.5	43	4.74	6.06
		12.5	65.6	0.19	4.44
		9.67	74.1	1.68	24.1
		19.2		3.06

## Sheet: Fig7D
		Figure 7D
		Frequency of Vb11- NKT cells within the Va24+ population
		blood	tonsil
		1.99	2.23
		3.32	11.4
		0	2.08
		0	7.2
		2.04	1.9
		2.23	2.56
		0.88	2.83
		0.14	4.8
		0.73	1.79
		2.72	8.06

## Sheet: Fig7E
		Figure 7E
		Frequency of Va24- NKT cells within the Vb11+ population
		blood	tonsil
		1.78	3.89
		3.18	6.7
		0.52	8.93
		2.33	8.7
		2.04	4.2
		2.49	4.65
		0.34	3.11
		0.62	3.03
		1.28	5.39
		0.74	1.64
